# Supplementary material for: Fine scale mapping of the 17q22 breast cancer locus using dense SNPs, genotyped within the Collaborative Oncological Gene-Environment Study (COGs)
Source: PubMed Central journal article supplement (PMC5013272; doi:10.1038/srep32512), 2016-09-07

**Fine scale mapping of the 17q22 breast cancer locus using dense SNPs,  
genotyped within the Collaborative Oncological Gene-Environment Study  
(COGs)**

Hatef Darabi <sup>1\*</sup>, Jonathan Beesley <sup>2§</sup>, Arnaud Droit <sup>3§</sup>, Siddhartha Kar <sup>4§</sup>, Silje Nord <sup>5§</sup>, Mahdi Moradi Marjaneh <sup>2§</sup>, Penny Soucy <sup>6</sup>, Kyriaki Michailidou <sup>7,8</sup>, Maya Ghoussaini <sup>4</sup>, Hanna Fues Wahl <sup>1</sup>, Manjeet K. Bolla <sup>7</sup>, Qin Wang <sup>7</sup>, Joe Dennis <sup>7</sup>, M. Rosario Alonso <sup>9</sup>, Irene L. Andrulis <sup>10,11</sup>, Hoda Anton-Culver <sup>12</sup>, Volker Arndt <sup>13</sup>, Matthias W. Beckmann <sup>14</sup>, Javier Benitez <sup>15,16</sup>, Natalia V. Bogdanova <sup>17</sup>, Stig E. Bojesen <sup>18-20</sup>, Hiltrud Brauch <sup>21-23</sup>, Hermann Brenner <sup>13,23,24</sup>, Annegien Broeks <sup>25</sup>, Thomas Brüning <sup>26</sup>, Barbara Burwinkel <sup>27,28</sup>, Jenny Chang-Claude <sup>29,30</sup>, Ji-Yeob Choi <sup>31,32</sup>, Don M. Conroy <sup>4</sup>, Fergus J. Couch <sup>33</sup>, Angela Cox <sup>34</sup>, Simon S. Cross <sup>35</sup>, Kamila Czene <sup>1</sup>, Peter Devilee <sup>36,37</sup>, Thilo Dörk <sup>38</sup>, Douglas F. Easton <sup>4,7</sup>, Peter A. Fasching <sup>14,39</sup>, Jonine Figueroa <sup>40,41</sup>, Olivia Fletcher <sup>42,43</sup>, Henrik Flyger <sup>44</sup>, Eva Galle <sup>45,46</sup>, Montserrat Garcia-Closas <sup>41</sup>, Graham G. Giles <sup>47,48</sup>, Mark S. Goldberg <sup>49,50</sup>, Anna González-Neira <sup>15</sup>, Pascal Guénel <sup>51</sup>, Christopher A. Haiman <sup>52</sup>, Emily Hallberg <sup>53</sup>, Ute Hamann <sup>54</sup>, Mikael Hartman <sup>55,56</sup>, Antoinette Hollestelle <sup>57</sup>, John L. Hopper <sup>48</sup>, Hidemi Ito <sup>58</sup>, Anna Jakubowska <sup>59</sup>, Nichola Johnson <sup>42,43</sup>, Daehee Kang <sup>31,32,60</sup>, Sofia Khan <sup>61</sup>, Veli-Matti Kosma <sup>62-64</sup>, Mieke Krieger <sup>57</sup>, Vessela Kristensen <sup>5,65,66</sup>, Diether Lambrechts <sup>45,46</sup>, Loic Le Marchand <sup>67</sup>, Soo Chin Lee <sup>68,69</sup>, Annika Lindblom <sup>70</sup>, Artitaya Lophatananon <sup>71</sup>, Jan Lubinski <sup>59</sup>, Arto Mannermaa <sup>62-64</sup>, Siranoush Manoukian <sup>72</sup>, Sara Margolin <sup>73</sup>, Keitaro Matsuo <sup>74</sup>, Rebecca Mayes <sup>4</sup>, James McKay <sup>75</sup>, Alfons Meindl <sup>76</sup>, Roger L. Milne <sup>47,48</sup>, Kenneth Muir <sup>71,77</sup>, Susan L. Neuhausen <sup>78</sup>, Heli Nevanlinna <sup>61</sup>, Curtis Olswold <sup>53</sup>, Nick Orr <sup>42</sup>, Paolo Peterlongo <sup>79</sup>, Guillermo Pita <sup>9</sup>, Katri Pylkäs <sup>80,81</sup>, Anja Rudolph <sup>29</sup>, Suleeporn Sangrajrang <sup>82</sup>, Elinor J. Sawyer <sup>83</sup>, Marjanka K. Schmidt <sup>25</sup>, Rita K. Schmutzler <sup>84-86</sup>, Caroline Seynaeve <sup>57</sup>, Mitul Shah <sup>4</sup>, Chen-Yang Shen <sup>87,88</sup>, Xiao-Ou Shu <sup>89</sup>, Melissa C. Southey <sup>90</sup>, Daniel O. Stram <sup>52</sup>, Harald Surowy <sup>27,28</sup>, Anthony Swerdlow <sup>43,91</sup>, Soo H. Teo <sup>92,93</sup>, Daniel C. Tessier <sup>94</sup>, Ian Tomlinson <sup>95</sup>, Diana Torres <sup>54,96</sup>, Thérèse Truong <sup>51</sup>, Celine M. Vachon <sup>53</sup>, Daniel

Vincent <sup>94</sup>, Robert Winqvist <sup>80,81</sup>, Anna H. Wu <sup>52</sup>, Pei-Ei Wu <sup>88</sup>, Cheng Har Yip <sup>93</sup>, Wei Zheng <sup>89</sup>, Paul D. P. Pharoah <sup>4,7</sup>, Per Hall <sup>1</sup>, Stacey L. Edwards <sup>2</sup>, Jacques Simard <sup>6</sup>, Juliet D. French <sup>2</sup>, Georgia Chenevix-Trench <sup>2</sup>, Alison M. Dunning <sup>4</sup>

§ Contributed equally.

- 1 Department of Medical Epidemiology and Biostatistics, Karolinska Institutet, Stockholm, Sweden.
- 2 Department of Genetics, QIMR Berghofer Medical Research Institute, Brisbane, Australia.
- 3 Département de Médecine Moléculaire, Faculté de Médecine, Centre Hospitalier Universitaire de Québec Research Center, Laval University, Québec City, Canada.
- 4 Centre for Cancer Genetic Epidemiology, Department of Oncology, University of Cambridge, Cambridge, UK.
- 5 Department of Cancer Genetics, Institute for Cancer Research, Oslo University Hospital Radiumhospitalet, Oslo, Norway.
- 6 Genomics Center, Centre Hospitalier Universitaire de Québec Research Center, Laval University, Québec City, Canada.
- 7 Centre for Cancer Genetic Epidemiology, Department of Public Health and Primary Care, University of Cambridge, Cambridge, UK.
- 8 Department of Electron Microscopy/Molecular Pathology, The Cyprus Institute of Neurology and Genetics, Nicosia, Cyprus.
- 9 Human Genotyping-CEGEN Unit, Human Cancer Genetic Program, Spanish National Cancer Research Centre, Madrid, Spain.
- 10 Lunenfeld-Tanenbaum Research Institute of Mount Sinai Hospital, Toronto, Canada.
- 11 Department of Molecular Genetics, University of Toronto, Toronto, Canada.
- 12 Department of Epidemiology, University of California Irvine, Irvine, CA, USA.
- 13 Division of Clinical Epidemiology and Aging Research, German Cancer Research Center (DKFZ), Heidelberg, Germany.
- 14 Department of Gynaecology and Obstetrics, University Hospital Erlangen, Friedrich-Alexander University Erlangen-Nuremberg, Comprehensive Cancer Center Erlangen-EMN, Erlangen, Germany.
- 15 Human Cancer Genetics Program, Spanish National Cancer Research Centre, Madrid, Spain.
- 16 Centro de Investigación en Red de Enfermedades Raras, Valencia, Spain.
- 17 Department of Radiation Oncology, Hannover Medical School, Hannover, Germany.
- 18 Copenhagen General Population Study, Herlev and Gentofte Hospital, Copenhagen University Hospital, Herlev, Denmark.
- 19 Department of Clinical Biochemistry, Herlev and Gentofte Hospital, Copenhagen University Hospital, Herlev, Denmark.
- 20 Faculty of Health and Medical Sciences, University of Copenhagen, Copenhagen, Denmark.
- 21 Dr. Margarete Fischer-Bosch-Institute of Clinical Pharmacology, Stuttgart, Germany.
- 22 University of Tübingen, Tübingen, Germany.
- 23 German Cancer Consortium (DKTK), German Cancer Research Center (DKFZ), Heidelberg, Germany.
- 24 Division of Preventive Oncology, German Cancer Research Center (DKFZ) and National Center for Tumor Diseases (NCT), Heidelberg, Germany.
- 25 Netherlands Cancer Institute, Antoni van Leeuwenhoek hospital, Amsterdam, The Netherlands.

- 26 Institute for Prevention and Occupational Medicine of the German Social Accident Insurance, Institute of the Ruhr University Bochum, Bochum, Germany.
- 27 Department of Obstetrics and Gynecology, University of Heidelberg, Heidelberg, Germany.
- 28 Molecular Epidemiology Group, German Cancer Research Center (DKFZ), Heidelberg, Germany.
- 29 Division of Cancer Epidemiology, German Cancer Research Center (DKFZ), Heidelberg, Germany.
- 30 University Cancer Center Hamburg (UCCH), University Medical Center Hamburg-Eppendorf, Hamburg, Germany.
- 31 Department of Biomedical Sciences, Seoul National University College of Medicine, Seoul, Korea.
- 32 Cancer Research Institute, Seoul National University, Seoul, Korea.
- 33 Department of Laboratory Medicine and Pathology, Mayo Clinic, Rochester, MN, USA.
- 34 Sheffield Cancer Research, Department of Oncology and Metabolism, University of Sheffield, Sheffield, UK.
- 35 Academic Unit of Pathology, Department of Neuroscience, University of Sheffield, Sheffield, UK.
- 36 Department of Pathology, Leiden University Medical Center, Leiden, The Netherlands.
- 37 Department of Human Genetics, Leiden University Medical Center, Leiden, The Netherlands.
- 38 Gynaecology Research Unit, Hannover Medical School, Hannover, Germany.
- 39 David Geffen School of Medicine, Department of Medicine Division of Hematology and Oncology, University of California at Los Angeles, Los Angeles, CA, USA.
- 40 Usher Institute of Population Health Sciences and Informatics, The University of Edinburgh Medical School, Edinburgh, UK.
- 41 Division of Cancer Epidemiology and Genetics, National Cancer Institute, Rockville, MD, USA.
- 42 Breakthrough Breast Cancer Research Centre, The Institute of Cancer Research, London, UK.
- 43 Division of Breast Cancer Research, The Institute of Cancer Research, London, UK.
- 44 Department of Breast Surgery, Herlev and Gentofte Hospital, Copenhagen University Hospital, Herlev, Denmark.
- 45 Vesalius Research Center, Leuven, Belgium.
- 46 Laboratory for Translational Genetics, Department of Oncology, University of Leuven, Leuven, Belgium.
- 47 Cancer Epidemiology Centre, Cancer Council Victoria, Melbourne, Australia.
- 48 Centre for Epidemiology and Biostatistics, Melbourne School of Population and Global Health, The University of Melbourne, Melbourne, Australia.
- 49 Department of Medicine, McGill University, Montreal, Canada.
- 50 Division of Clinical Epidemiology, Royal Victoria Hospital, McGill University, Montreal, Canada.
- 51 Cancer & Environment Group, Center for Research in Epidemiology and Population Health (CESP), INSERM, University Paris-Sud, University Paris-Saclay, Villejuif, France.
- 52 Department of Preventive Medicine, Keck School of Medicine, University of Southern California, Los Angeles, CA, USA.
- 53 Department of Health Sciences Research, Mayo Clinic, Rochester, MN, USA.
- 54 Molecular Genetics of Breast Cancer, German Cancer Research Center (DKFZ), Heidelberg, Germany.
- 55 Saw Swee Hock School of Public Health, National University of Singapore, Singapore, Singapore.
- 56 Department of Surgery, National University Health System, Singapore, Singapore.

- 57 Department of Medical Oncology, Family Cancer Clinic, Erasmus MC Cancer Institute, Rotterdam, The Netherlands.
- 58 Division of Epidemiology and Prevention, Aichi Cancer Center Research Institute, Nagoya, Japan.
- 59 Department of Genetics and Pathology, Pomeranian Medical University, Szczecin, Poland.
- 60 Department of Preventive Medicine, Seoul National University College of Medicine, Seoul, Korea.
- 61 Department of Obstetrics and Gynecology, Helsinki University Hospital, University of Helsinki, Helsinki, Finland.
- 62 Cancer Center of Eastern Finland, University of Eastern Finland, Kuopio, Finland.
- 63 Institute of Clinical Medicine, Pathology and Forensic Medicine, University of Eastern Finland, Kuopio, Finland.
- 64 Imaging Center, Department of Clinical Pathology, Kuopio University Hospital, Kuopio, Finland.
- 65 K.G. Jebsen Center for Breast Cancer Research, Institute of Clinical Medicine, Faculty of Medicine, University of Oslo, Oslo, Norway.
- 66 Department of Clinical Molecular Biology, Oslo University Hospital, University of Oslo, Oslo, Norway.
- 67 University of Hawaii Cancer Center, Honolulu, HI, USA.
- 68 Department of Hematology-Oncology, National University Health System, Singapore, Singapore.
- 69 Cancer Science Institute of Singapore, National University of Singapore, Singapore, Singapore.
- 70 Department of Molecular Medicine and Surgery, Karolinska Institutet, Stockholm, Sweden.
- 71 Division of Health Sciences, Warwick Medical School, Warwick University, Coventry, UK.
- 72 Unit of Molecular Bases of Genetic Risk and Genetic Testing, Department of Preventive and Predictive Medicine, Fondazione IRCCS (Istituto Di Ricovero e Cura a Carattere Scientifico) Istituto Nazionale dei Tumori (INT), Milan, Italy.
- 73 Department of Oncology - Pathology, Karolinska Institutet, Stockholm, Sweden.
- 74 Division of Molecular Medicine, Aichi Cancer Center Research Institute, Nagoya, Japan.
- 75 International Agency for Research on Cancer, Lyon, France.
- 76 Division of Gynaecology and Obstetrics, Technische Universität München, Munich, Germany.
- 77 Institute of Population Health, University of Manchester, Manchester, UK.
- 78 Department of Population Sciences, Beckman Research Institute of City of Hope, Duarte, CA, USA.
- 79 IFOM, The FIRC (Italian Foundation for Cancer Research) Institute of Molecular Oncology, Milan, Italy.
- 80 Laboratory of Cancer Genetics and Tumor Biology, Cancer and Translational Medicine Research Unit, Biocenter Oulu, University of Oulu, Oulu, Finland.
- 81 Laboratory of Cancer Genetics and Tumor Biology, Northern Finland Laboratory Centre Oulu, Oulu, Finland.
- 82 National Cancer Institute, Bangkok, Thailand.
- 83 Research Oncology, Guy's Hospital, King's College London, London, UK.
- 84 Center for Hereditary Breast and Ovarian Cancer, University Hospital of Cologne, Cologne, Germany.
- 85 Center for Integrated Oncology (CIO), University Hospital of Cologne, Cologne, Germany.

- 86 Center for Molecular Medicine Cologne (CMMC), University of Cologne, Cologne, Germany.
- 87 Institute of Biomedical Sciences, Academia Sinica, Taipei, Taiwan.
- 88 Taiwan Biobank, Institute of Biomedical Sciences, Academia Sinica, Taipei, Taiwan.
- 89 Division of Epidemiology, Department of Medicine, Vanderbilt-Ingram Cancer Center, Vanderbilt University School of Medicine, Nashville, TN, USA.
- 90 Department of Pathology, The University of Melbourne, Melbourne, Australia.
- 91 Division of Genetics and Epidemiology, The Institute of Cancer Research, London, UK.
- 92 Cancer Research Initiatives Foundation, Subang Jaya, Selangor, Malaysia.
- 93 Breast Cancer Research Unit, Cancer Research Institute, University Malaya Medical Centre, Kuala Lumpur, Malaysia.
- 94 McGill University and Génome Québec Innovation Centre, Montréal, Canada.
- 95 Wellcome Trust Centre for Human Genetics and Oxford NIHR Biomedical Research Centre, University of Oxford, Oxford, UK.
- 96 Institute of Human Genetics, Pontificia Universidad Javeriana, Bogota, Colombia.

**Supplementary Table 1: Based on data from all European studies, genotyped or imputed variants associated with overall risk (P-values < 1x10<sup>-4</sup>).**

| SNP              | Position <sup>a</sup> | Type      | Major/Minor <sup>b</sup> | MAF <sup>c</sup> | Info <sup>d</sup> | Overall Risk <sup>e</sup> |                  | ER+ <sup>e</sup> |                  | ER- <sup>e</sup> |                  | Heterogeneity <sup>f</sup> | RL <sup>g</sup> |
|------------------|-----------------------|-----------|--------------------------|------------------|-------------------|---------------------------|------------------|------------------|------------------|------------------|------------------|----------------------------|-----------------|
|                  |                       |           |                          |                  |                   | P-value                   | OR (95% CI)      | P-value          | OR (95% CI)      | P-value          | OR (95% CI)      | P-value                    |                 |
| rs2787486        | 53209774              | Imputed   | A/C                      | 0.28             | 0.958             | 8.96E-15                  | 0.92 (0.9,0.94)  | 1.39E-14         | 0.91 (0.88,0.93) | 0.0177           | 0.95 (0.91,0.99) | 0.016634                   | -               |
| rs244353         | 53194769              | Genotyped | G/A                      | 0.29             | 1                 | 5.75E-14                  | 0.92 (0.9,0.94)  | 5.96E-14         | 0.91 (0.89,0.93) | 0.0275           | 0.96 (0.92,1)    | 0.015142                   | 0.161           |
| rs2628321        | 53205917              | Genotyped | A/G                      | 0.29             | 1                 | 5.88E-14                  | 0.92 (0.9,0.94)  | 7.01E-14         | 0.91 (0.89,0.93) | 0.0277           | 0.96 (0.92,1)    | 0.015346                   | 0.157           |
| rs2628316        | 53219837              | Genotyped | A/G                      | 0.29             | 1                 | 6.00E-14                  | 0.92 (0.9,0.94)  | 1.17E-13         | 0.91 (0.89,0.93) | 0.0276           | 0.96 (0.92,1)    | 0.015608                   | 0.154           |
| rs244338         | 53200418              | Genotyped | G/A                      | 0.29             | 1                 | 6.21E-14                  | 0.92 (0.9,0.94)  | 6.70E-14         | 0.91 (0.89,0.93) | 0.0276           | 0.96 (0.92,1)    | 0.015585                   | 0.149           |
| rs244337         | 53201124              | Imputed   | G/T                      | 0.29             | 0.992             | 6.60E-14                  | 0.92 (0.9,0.94)  | 6.29E-14         | 0.91 (0.89,0.93) | 0.0304           | 0.96 (0.92,1)    | 0.013809                   | 0.14            |
| rs244342         | 53198407              | Genotyped | C/T                      | 0.29             | 1                 | 6.73E-14                  | 0.92 (0.9,0.94)  | 7.48E-14         | 0.91 (0.89,0.93) | 0.03             | 0.96 (0.92,1)    | 0.014533                   | 0.138           |
| rs2529510        | 53182046              | Imputed   | T/A                      | 0.3              | 0.91              | 6.92E-14                  | 0.92 (0.9,0.94)  | 2.08E-14         | 0.91 (0.88,0.93) | 0.0645           | 0.96 (0.92,1)    | 0.00655                    | 0.134           |
| rs244373         | 53184949              | Imputed   | C/T                      | 0.29             | 0.984             | 7.30E-14                  | 0.92 (0.9,0.94)  | 7.84E-14         | 0.91 (0.89,0.93) | 0.0315           | 0.96 (0.92,1)    | 0.012324                   | 0.127           |
| rs2628315        | 53226622              | Genotyped | G/A                      | 0.29             | 1                 | 9.02E-14                  | 0.92 (0.9,0.94)  | 1.78E-13         | 0.91 (0.89,0.93) | 0.0259           | 0.96 (0.92,0.99) | 0.018409                   | 0.103           |
| chr17:53221365:l | 53221365              | Imputed   | T/TGC                    | 0.29             | 0.978             | 9.68E-14                  | 0.92 (0.9,0.94)  | 1.44E-13         | 0.91 (0.89,0.93) | 0.0254           | 0.95 (0.92,0.99) | 0.018015                   | 0.096           |
| rs244321         | 53223998              | Imputed   | T/A                      | 0.29             | 0.989             | 1.72E-13                  | 0.92 (0.91,0.94) | 3.22E-13         | 0.91 (0.89,0.94) | 0.0245           | 0.95 (0.92,0.99) | 0.023115                   | 0.055           |
| rs244322         | 53224759              | Imputed   | C/T                      | 0.29             | 0.99              | 2.03E-13                  | 0.93 (0.91,0.94) | 3.35E-13         | 0.91 (0.89,0.94) | 0.0281           | 0.96 (0.92,1)    | 0.021021                   | 0.046           |
| rs244319         | 53222874              | Genotyped | G/A                      | 0.29             | 1                 | 2.19E-13                  | 0.93 (0.91,0.94) | 4.18E-13         | 0.91 (0.89,0.94) | 0.028            | 0.96 (0.92,1)    | 0.021933                   | 0.043           |
| rs244320         | 53222920              | Genotyped | C/T                      | 0.29             | 1                 | 2.19E-13                  | 0.93 (0.91,0.94) | 4.18E-13         | 0.91 (0.89,0.94) | 0.028            | 0.96 (0.92,1)    | 0.021933                   | 0.043           |
| rs10432032       | 53224088              | Genotyped | A/G                      | 0.29             | 1                 | 2.47E-13                  | 0.93 (0.91,0.94) | 5.33E-13         | 0.91 (0.89,0.94) | 0.0281           | 0.96 (0.92,1)    | 0.023436                   | 0.038           |
| rs244318         | 53221368              | Imputed   | A/G                      | 0.29             | 0.985             | 4.19E-13                  | 0.93 (0.91,0.95) | 3.56E-13         | 0.91 (0.89,0.94) | 0.036            | 0.96 (0.92,1)    | 0.014627                   | 0.023           |
| rs244315         | 53214654              | Genotyped | C/T                      | 0.27             | 1                 | 4.72E-13                  | 0.92 (0.91,0.94) | 4.27E-13         | 0.91 (0.89,0.93) | 0.0493           | 0.96 (0.92,1)    | 0.010962                   | 0.02            |
| rs244317         | 53216985              | Genotyped | A/T                      | 0.27             | 1                 | 5.79E-13                  | 0.92 (0.91,0.94) | 2.74E-13         | 0.91 (0.89,0.93) | 0.0649           | 0.96 (0.92,1)    | 0.007933                   | 0.017           |

|                  |          |           |       |      |       |          |                  |          |                  |        |                  |          |       |
|------------------|----------|-----------|-------|------|-------|----------|------------------|----------|------------------|--------|------------------|----------|-------|
| rs2787481        | 53211110 | Genotyped | T/C   | 0.27 | 1     | 6.44E-13 | 0.92 (0.91,0.94) | 2.93E-13 | 0.91 (0.89,0.93) | 0.0637 | 0.96 (0.92,1)    | 0.008094 | 0.015 |
| rs8082622        | 53177567 | Genotyped | C/T   | 0.27 | 1     | 7.06E-13 | 0.93 (0.91,0.94) | 6.24E-13 | 0.91 (0.89,0.94) | 0.0528 | 0.96 (0.92,1)    | 0.011023 | 0.014 |
| rs244348         | 53196291 | Genotyped | G/A   | 0.27 | 1     | 7.08E-13 | 0.93 (0.91,0.94) | 5.20E-13 | 0.91 (0.89,0.93) | 0.0547 | 0.96 (0.92,1)    | 0.010577 | 0.014 |
| rs187242         | 53192946 | Imputed   | T/A   | 0.29 | 0.984 | 8.17E-13 | 0.93 (0.91,0.95) | 2.65E-12 | 0.92 (0.89,0.94) | 0.0278 | 0.96 (0.92,1)    | 0.029991 | 0.012 |
| rs244336         | 53201502 | Genotyped | G/A   | 0.27 | 1     | 8.80E-13 | 0.93 (0.91,0.95) | 7.60E-13 | 0.91 (0.89,0.94) | 0.047  | 0.96 (0.92,1)    | 0.012981 | 0.011 |
| rs2787497        | 53176211 | Genotyped | A/G   | 0.27 | 1     | 9.27E-13 | 0.93 (0.91,0.95) | 3.52E-13 | 0.91 (0.89,0.93) | 0.0702 | 0.96 (0.92,1)    | 0.007276 | 0.01  |
| rs244294         | 53228543 | Imputed   | A/G   | 0.29 | 0.986 | 9.28E-13 | 0.93 (0.91,0.95) | 1.21E-12 | 0.91 (0.89,0.94) | 0.0354 | 0.96 (0.92,1)    | 0.021678 | 0.01  |
| chr17:53205761:D | 53205761 | Imputed   | AT/A  | 0.27 | 0.987 | 9.42E-13 | 0.93 (0.91,0.95) | 7.95E-13 | 0.91 (0.89,0.94) | 0.0552 | 0.96 (0.92,1)    | 0.011595 | 0.01  |
| rs244358         | 53192231 | Genotyped | C/T   | 0.27 | 1     | 9.68E-13 | 0.93 (0.91,0.95) | 2.97E-13 | 0.91 (0.89,0.93) | 0.0893 | 0.97 (0.93,1.01) | 0.005256 | 0.01  |
| rs2787483        | 53210314 | Imputed   | G/A   | 0.27 | 0.982 | 1.09E-12 | 0.93 (0.91,0.95) | 5.89E-13 | 0.91 (0.89,0.93) | 0.0693 | 0.96 (0.92,1)    | 0.009154 | 0.009 |
| rs2529504        | 53206164 | Imputed   | C/T   | 0.27 | 0.988 | 1.10E-12 | 0.93 (0.91,0.95) | 8.72E-13 | 0.91 (0.89,0.94) | 0.058  | 0.96 (0.92,1)    | 0.010945 | 0.009 |
| rs2628317        | 53212573 | Imputed   | A/G   | 0.26 | 0.953 | 1.14E-12 | 0.92 (0.9,0.94)  | 5.42E-13 | 0.91 (0.89,0.93) | 0.068  | 0.96 (0.92,1)    | 0.009292 | 0.009 |
| rs244377         | 53183079 | Imputed   | T/C   | 0.27 | 0.987 | 1.31E-12 | 0.93 (0.91,0.95) | 9.88E-13 | 0.91 (0.89,0.94) | 0.0634 | 0.96 (0.92,1)    | 0.009435 | 0.007 |
| chr17:53179335:l | 53179335 | Imputed   | ACT/A | 0.27 | 0.983 | 1.54E-12 | 0.93 (0.91,0.95) | 6.19E-13 | 0.91 (0.89,0.93) | 0.0805 | 0.96 (0.92,1)    | 0.007396 | 0.006 |
| rs244376         | 53183199 | Imputed   | C/A   | 0.27 | 0.985 | 1.56E-12 | 0.93 (0.91,0.95) | 6.75E-13 | 0.91 (0.89,0.93) | 0.0788 | 0.96 (0.92,1)    | 0.007441 | 0.006 |
| chr17:53179336:l | 53179336 | Imputed   | CTT/C | 0.27 | 0.983 | 1.60E-12 | 0.93 (0.91,0.95) | 5.85E-13 | 0.91 (0.89,0.93) | 0.0822 | 0.96 (0.92,1)    | 0.007065 | 0.006 |
| rs181727         | 53190995 | Imputed   | T/C   | 0.27 | 0.986 | 1.63E-12 | 0.93 (0.91,0.95) | 7.51E-13 | 0.91 (0.89,0.94) | 0.0764 | 0.96 (0.92,1)    | 0.008189 | 0.006 |
| chr17:53210314:l | 53210314 | Imputed   | G/GTA | 0.27 | 0.978 | 1.78E-12 | 0.93 (0.91,0.95) | 8.50E-13 | 0.91 (0.89,0.93) | 0.0742 | 0.96 (0.92,1)    | 0.008923 | 0.006 |
| rs244379         | 53182578 | Imputed   | G/A   | 0.35 | 0.804 | 2.01E-12 | 0.92 (0.9,0.94)  | 4.41E-12 | 0.91 (0.89,0.94) | 0.0329 | 0.95 (0.91,1)    | 0.067268 | 0.005 |
| rs2787501        | 53093965 | Imputed   | C/G   | 0.3  | 0.989 | 2.91E-12 | 0.93 (0.91,0.95) | 2.22E-12 | 0.92 (0.89,0.94) | 0.0795 | 0.96 (0.93,1)    | 0.01109  | 0.003 |
| rs12449538       | 53111121 | Genotyped | C/T   | 0.3  | 1     | 3.56E-12 | 0.93 (0.91,0.95) | 4.05E-12 | 0.92 (0.9,0.94)  | 0.0835 | 0.97 (0.93,1)    | 0.010763 | 0.003 |
| rs2787500        | 53169806 | Genotyped | T/G   | 0.3  | 1     | 4.41E-12 | 0.93 (0.91,0.95) | 4.36E-12 | 0.92 (0.9,0.94)  | 0.0788 | 0.96 (0.93,1)    | 0.01295  | 0.002 |

|                  |          |           |      |      |       |          |                  |          |                  |        |                  |          |         |
|------------------|----------|-----------|------|------|-------|----------|------------------|----------|------------------|--------|------------------|----------|---------|
| rs4794551        | 53075427 | Imputed   | G/A  | 0.3  | 0.986 | 4.79E-12 | 0.93 (0.91,0.95) | 2.06E-12 | 0.92 (0.89,0.94) | 0.0839 | 0.97 (0.93,1)    | 0.009085 | 0.002   |
| rs1812715        | 53174966 | Imputed   | G/A  | 0.32 | 0.942 | 5.62E-12 | 0.93 (0.91,0.95) | 1.33E-12 | 0.92 (0.89,0.94) | 0.0613 | 0.96 (0.92,1)    | 0.012593 | 0.002   |
| rs2628301        | 53159273 | Genotyped | C/T  | 0.27 | 1     | 1.01E-11 | 0.93 (0.91,0.95) | 8.88E-12 | 0.92 (0.89,0.94) | 0.0979 | 0.97 (0.93,1.01) | 0.008736 | 0.001   |
| rs2541236        | 53159832 | Imputed   | G/T  | 0.27 | 0.987 | 1.14E-11 | 0.93 (0.91,0.95) | 1.65E-11 | 0.92 (0.89,0.94) | 0.0848 | 0.96 (0.93,1.01) | 0.012018 | 8.91e-4 |
| rs2541242        | 53089687 | Imputed   | C/T  | 0.27 | 0.987 | 1.16E-11 | 0.93 (0.91,0.95) | 9.65E-12 | 0.92 (0.89,0.94) | 0.0995 | 0.97 (0.93,1.01) | 0.009764 | 8.8e-4  |
| rs1156287        | 53076799 | Genotyped | A/G  | 0.28 | 1     | 3.41E-11 | 0.93 (0.91,0.95) | 2.31E-11 | 0.92 (0.9,0.94)  | 0.158  | 0.97 (0.93,1.01) | 0.00694  | 3.06e-4 |
| rs2541245        | 53101200 | Genotyped | A/G  | 0.28 | 1     | 3.97E-11 | 0.93 (0.91,0.95) | 2.53E-11 | 0.92 (0.9,0.94)  | 0.161  | 0.97 (0.93,1.01) | 0.007331 | 2.64e-4 |
| rs11658717       | 53076986 | Genotyped | A/G  | 0.28 | 1     | 4.05E-11 | 0.93 (0.91,0.95) | 5.32E-11 | 0.92 (0.9,0.94)  | 0.129  | 0.97 (0.93,1.01) | 0.010944 | 2.58e-4 |
| rs2628309        | 53115419 | Genotyped | A/G  | 0.28 | 1     | 4.10E-11 | 0.93 (0.91,0.95) | 2.47E-11 | 0.92 (0.9,0.94)  | 0.175  | 0.97 (0.93,1.01) | 0.005769 | 2.55e-4 |
| rs2628308        | 53123573 | Genotyped | G/C  | 0.28 | 1     | 4.23E-11 | 0.93 (0.91,0.95) | 5.65E-11 | 0.92 (0.9,0.94)  | 0.131  | 0.97 (0.93,1.01) | 0.011167 | 2.48e-4 |
| rs2787505        | 53107432 | Genotyped | C/T  | 0.28 | 1     | 4.61E-11 | 0.93 (0.91,0.95) | 2.62E-11 | 0.92 (0.9,0.94)  | 0.167  | 0.97 (0.93,1.01) | 0.00696  | 2.27e-4 |
| rs17745534       | 53137506 | Genotyped | G/A  | 0.28 | 1     | 5.25E-11 | 0.93 (0.91,0.95) | 2.58E-11 | 0.92 (0.9,0.94)  | 0.171  | 0.97 (0.93,1.01) | 0.006991 | 2.01e-4 |
| rs9889687        | 53132411 | Imputed   | A/G  | 0.28 | 0.992 | 5.52E-11 | 0.93 (0.91,0.95) | 2.87E-11 | 0.92 (0.9,0.94)  | 0.182  | 0.97 (0.93,1.01) | 0.006642 | 1.91e-4 |
| rs2787476        | 53089133 | Imputed   | C/T  | 0.28 | 0.981 | 5.59E-11 | 0.93 (0.91,0.95) | 3.72E-11 | 0.92 (0.9,0.94)  | 0.143  | 0.97 (0.93,1.01) | 0.011311 | 1.88e-4 |
| rs1484776        | 53111383 | Genotyped | C/A  | 0.28 | 1     | 5.61E-11 | 0.93 (0.91,0.95) | 6.80E-11 | 0.92 (0.9,0.94)  | 0.149  | 0.97 (0.93,1.01) | 0.009019 | 1.88e-4 |
| rs2787507        | 53127924 | Genotyped | T/C  | 0.28 | 1     | 5.70E-11 | 0.93 (0.91,0.95) | 3.73E-11 | 0.92 (0.9,0.94)  | 0.159  | 0.97 (0.93,1.01) | 0.007897 | 1.85e-4 |
| rs9303363        | 53137974 | Genotyped | G/A  | 0.28 | 1     | 5.74E-11 | 0.93 (0.91,0.95) | 2.29E-11 | 0.92 (0.9,0.94)  | 0.191  | 0.97 (0.93,1.01) | 0.005695 | 1.84e-4 |
| chr17:53100141:l | 53100141 | Imputed   | GA/G | 0.28 | 0.987 | 5.87E-11 | 0.93 (0.91,0.95) | 3.44E-11 | 0.92 (0.9,0.94)  | 0.162  | 0.97 (0.93,1.01) | 0.009011 | 1.8e-4  |
| rs2787494        | 53091181 | Imputed   | C/G  | 0.28 | 0.987 | 5.97E-11 | 0.93 (0.91,0.95) | 3.37E-11 | 0.92 (0.9,0.94)  | 0.166  | 0.97 (0.93,1.01) | 0.008615 | 1.77e-4 |
| rs2628296        | 53166495 | Genotyped | A/T  | 0.28 | 1     | 6.02E-11 | 0.93 (0.91,0.95) | 6.93E-11 | 0.92 (0.9,0.94)  | 0.118  | 0.97 (0.93,1.01) | 0.013887 | 1.75e-4 |
| rs2628304        | 53157189 | Imputed   | A/G  | 0.28 | 0.988 | 6.09E-11 | 0.93 (0.91,0.95) | 5.87E-11 | 0.92 (0.9,0.94)  | 0.142  | 0.97 (0.93,1.01) | 0.010396 | 1.73e-4 |
| rs1484769        | 53166651 | Imputed   | A/G  | 0.28 | 0.989 | 6.09E-11 | 0.93 (0.91,0.95) | 4.11E-11 | 0.92 (0.9,0.94)  | 0.149  | 0.97 (0.93,1.01) | 0.009746 | 1.73e-4 |



|                  |          |           |       |      |       |          |                  |          |                  |        |                  |          |         |
|------------------|----------|-----------|-------|------|-------|----------|------------------|----------|------------------|--------|------------------|----------|---------|
| rs2787477        | 53089139 | Imputed   | C/G   | 0.28 | 0.987 | 6.10E-11 | 0.93 (0.91,0.95) | 3.63E-11 | 0.92 (0.9,0.94)  | 0.16   | 0.97 (0.93,1.01) | 0.009348 | 1.73e-4 |
| rs2628305        | 53140427 | Genotyped | C/A   | 0.28 | 1     | 6.26E-11 | 0.93 (0.91,0.95) | 6.30E-11 | 0.92 (0.9,0.94)  | 0.14   | 0.97 (0.93,1.01) | 0.011499 | 1.69e-4 |
| rs2541237        | 53164037 | Imputed   | G/C   | 0.28 | 0.987 | 6.37E-11 | 0.93 (0.91,0.95) | 4.09E-11 | 0.92 (0.9,0.94)  | 0.158  | 0.97 (0.93,1.01) | 0.009019 | 1.66e-4 |
| rs11079143       | 53083122 | Genotyped | G/A   | 0.28 | 1     | 9.53E-11 | 0.93 (0.91,0.95) | 5.37E-11 | 0.92 (0.9,0.94)  | 0.149  | 0.97 (0.93,1.01) | 0.008871 | 1.12e-4 |
| rs7218719        | 53245227 | Genotyped | A/G   | 0.28 | 1     | 1.20E-10 | 0.93 (0.91,0.95) | 4.93E-11 | 0.92 (0.9,0.94)  | 0.0908 | 0.97 (0.93,1.01) | 0.016761 | 8.91e-5 |
| rs12936639       | 53235982 | Genotyped | G/A   | 0.28 | 1     | 2.28E-10 | 0.93 (0.91,0.95) | 9.74E-11 | 0.92 (0.9,0.94)  | 0.112  | 0.97 (0.93,1.01) | 0.016191 | 4.78e-5 |
| rs7211787        | 53234912 | Genotyped | A/T   | 0.28 | 1     | 2.61E-10 | 0.93 (0.91,0.95) | 1.00E-10 | 0.92 (0.9,0.94)  | 0.12   | 0.97 (0.93,1.01) | 0.014567 | 4.18e-5 |
| rs9898886        | 53249679 | Genotyped | A/G   | 0.28 | 1     | 3.11E-10 | 0.93 (0.92,0.95) | 2.62E-10 | 0.92 (0.9,0.95)  | 0.0783 | 0.96 (0.93,1)    | 0.029238 | 3.52e-5 |
| rs2541243        | 53091266 | Imputed   | G/A   | 0.3  | 0.933 | 3.28E-10 | 0.93 (0.91,0.95) | 2.52E-10 | 0.92 (0.9,0.95)  | 0.116  | 0.97 (0.93,1.01) | 0.021469 | 3.35e-5 |
| chr17:53210312:D | 53210312 | Imputed   | ATG/A | 0.23 | 0.894 | 6.44E-10 | 0.93 (0.91,0.95) | 2.23E-10 | 0.91 (0.89,0.94) | 0.0781 | 0.96 (0.92,1)    | 0.028596 | 1.73e-5 |
| rs10468513       | 53062903 | Genotyped | C/A   | 0.27 | 1     | 1.48E-09 | 0.94 (0.92,0.96) | 8.34E-09 | 0.93 (0.91,0.95) | 0.128  | 0.97 (0.93,1.01) | 0.026396 | 7.69e-6 |
| rs9915832        | 53054697 | Imputed   | G/A   | 0.27 | 0.994 | 1.55E-09 | 0.94 (0.92,0.96) | 8.22E-09 | 0.93 (0.91,0.95) | 0.133  | 0.97 (0.93,1.01) | 0.024531 | 7.37e-6 |
| rs17818028       | 53062755 | Genotyped | C/G   | 0.27 | 1     | 1.55E-09 | 0.94 (0.92,0.96) | 5.32E-09 | 0.93 (0.9,0.95)  | 0.155  | 0.97 (0.93,1.01) | 0.019138 | 7.35e-6 |
| rs8078550        | 53053379 | Imputed   | T/G   | 0.27 | 0.994 | 1.65E-09 | 0.94 (0.92,0.96) | 8.17E-09 | 0.93 (0.91,0.95) | 0.133  | 0.97 (0.93,1.01) | 0.024721 | 6.9e-6  |
| rs9914732        | 53054367 | Imputed   | C/G   | 0.27 | 0.995 | 1.69E-09 | 0.94 (0.92,0.96) | 8.23E-09 | 0.93 (0.91,0.95) | 0.135  | 0.97 (0.93,1.01) | 0.024461 | 6.74e-6 |
| rs7221223        | 53059007 | Genotyped | A/G   | 0.27 | 1     | 1.69E-09 | 0.94 (0.92,0.96) | 5.39E-09 | 0.93 (0.9,0.95)  | 0.158  | 0.97 (0.93,1.01) | 0.019138 | 6.77e-6 |
| rs9893306        | 53054749 | Imputed   | A/T   | 0.27 | 0.995 | 1.71E-09 | 0.94 (0.92,0.96) | 8.26E-09 | 0.93 (0.91,0.95) | 0.135  | 0.97 (0.93,1.01) | 0.024481 | 6.68e-6 |
| rs9902687        | 53048924 | Imputed   | G/A   | 0.27 | 0.994 | 1.75E-09 | 0.94 (0.92,0.96) | 8.69E-09 | 0.93 (0.91,0.95) | 0.135  | 0.97 (0.93,1.01) | 0.025009 | 6.52e-6 |
| rs8080491        | 53049869 | Imputed   | T/A   | 0.27 | 0.995 | 1.79E-09 | 0.94 (0.92,0.96) | 8.80E-09 | 0.93 (0.91,0.95) | 0.135  | 0.97 (0.93,1.01) | 0.024952 | 6.4e-6  |
| rs9916642        | 53054497 | Genotyped | T/C   | 0.27 | 1     | 1.80E-09 | 0.94 (0.92,0.96) | 9.22E-09 | 0.93 (0.91,0.95) | 0.127  | 0.97 (0.93,1.01) | 0.026962 | 6.35e-6 |
| rs7219874        | 53065807 | Genotyped | C/T   | 0.27 | 1     | 1.80E-09 | 0.94 (0.92,0.96) | 9.47E-09 | 0.93 (0.91,0.95) | 0.127  | 0.97 (0.93,1.01) | 0.026962 | 6.35e-6 |
| rs6504949        | 53050133 | Genotyped | T/G   | 0.27 | 1     | 1.81E-09 | 0.94 (0.92,0.96) | 9.00E-09 | 0.93 (0.91,0.95) | 0.129  | 0.97 (0.93,1.01) | 0.026791 | 6.32e-6 |

|                  |          |           |       |      |       |          |                  |          |                  |       |                  |          |         |
|------------------|----------|-----------|-------|------|-------|----------|------------------|----------|------------------|-------|------------------|----------|---------|
| rs6504948        | 53049987 | Genotyped | T/C   | 0.27 | 1     | 1.82E-09 | 0.94 (0.92,0.96) | 9.56E-09 | 0.93 (0.91,0.95) | 0.13  | 0.97 (0.93,1.01) | 0.02668  | 6.28e-6 |
| chr17:53057391:l | 53057391 | Imputed   | C/CTA | 0.27 | 0.994 | 1.83E-09 | 0.94 (0.92,0.96) | 8.84E-09 | 0.93 (0.91,0.95) | 0.138 | 0.97 (0.93,1.01) | 0.024638 | 6.23e-6 |
| rs9897447        | 53048469 | Imputed   | T/C   | 0.27 | 0.993 | 1.84E-09 | 0.94 (0.92,0.96) | 8.59E-09 | 0.93 (0.91,0.95) | 0.14  | 0.97 (0.93,1.01) | 0.024111 | 6.22e-6 |
| rs9892173        | 53060214 | Genotyped | C/T   | 0.27 | 1     | 1.85E-09 | 0.94 (0.92,0.96) | 9.34E-09 | 0.93 (0.91,0.95) | 0.134 | 0.97 (0.93,1.01) | 0.026396 | 6.2e-6  |
| rs6504951        | 53056975 | Imputed   | A/G   | 0.27 | 0.995 | 1.86E-09 | 0.94 (0.92,0.96) | 8.72E-09 | 0.93 (0.91,0.95) | 0.138 | 0.97 (0.93,1.01) | 0.024599 | 6.16e-6 |
| rs7222197        | 53047499 | Genotyped | G/A   | 0.27 | 1     | 1.90E-09 | 0.94 (0.92,0.96) | 9.26E-09 | 0.93 (0.91,0.95) | 0.135 | 0.97 (0.93,1.01) | 0.026109 | 6.02e-6 |
| rs9896044        | 53048542 | Genotyped | C/G   | 0.27 | 1     | 1.90E-09 | 0.94 (0.92,0.96) | 9.88E-09 | 0.93 (0.91,0.95) | 0.134 | 0.97 (0.93,1.01) | 0.02668  | 6.03e-6 |
| rs9891865        | 53060033 | Genotyped | C/T   | 0.27 | 1     | 1.90E-09 | 0.94 (0.92,0.96) | 9.57E-09 | 0.93 (0.91,0.95) | 0.135 | 0.97 (0.93,1.01) | 0.026396 | 6.03e-6 |
| rs1990674        | 53061075 | Genotyped | G/A   | 0.27 | 1     | 1.90E-09 | 0.94 (0.92,0.96) | 9.57E-09 | 0.93 (0.91,0.95) | 0.135 | 0.97 (0.93,1.01) | 0.026396 | 6.03e-6 |
| rs9902718        | 53061622 | Genotyped | T/C   | 0.27 | 1     | 1.90E-09 | 0.94 (0.92,0.96) | 9.57E-09 | 0.93 (0.91,0.95) | 0.135 | 0.97 (0.93,1.01) | 0.026396 | 6.03e-6 |
| rs9903146        | 53057747 | Imputed   | C/T   | 0.27 | 0.994 | 1.94E-09 | 0.94 (0.92,0.96) | 9.02E-09 | 0.93 (0.91,0.95) | 0.14  | 0.97 (0.93,1.01) | 0.024274 | 5.92e-6 |
| rs17745344       | 53048319 | Genotyped | A/G   | 0.27 | 1     | 1.95E-09 | 0.94 (0.92,0.96) | 5.84E-09 | 0.93 (0.9,0.95)  | 0.163 | 0.97 (0.93,1.01) | 0.019313 | 5.88e-6 |
| rs9903220        | 53057865 | Imputed   | A/G   | 0.27 | 0.994 | 1.95E-09 | 0.94 (0.92,0.96) | 9.07E-09 | 0.93 (0.91,0.95) | 0.14  | 0.97 (0.93,1.01) | 0.02423  | 5.88e-6 |
| rs9903825        | 53057914 | Imputed   | G/A   | 0.27 | 0.994 | 1.95E-09 | 0.94 (0.92,0.96) | 9.08E-09 | 0.93 (0.91,0.95) | 0.141 | 0.97 (0.93,1.01) | 0.024217 | 5.87e-6 |
| rs9892976        | 53060329 | Genotyped | G/A   | 0.27 | 1     | 1.95E-09 | 0.94 (0.92,0.96) | 9.66E-09 | 0.93 (0.91,0.95) | 0.137 | 0.97 (0.93,1.01) | 0.025861 | 5.87e-6 |
| rs16955471       | 53058807 | Imputed   | G/T   | 0.27 | 0.994 | 1.96E-09 | 0.94 (0.92,0.96) | 9.28E-09 | 0.93 (0.91,0.95) | 0.136 | 0.97 (0.93,1.01) | 0.025543 | 5.86e-6 |
| chr17:53059061:l | 53059061 | Imputed   | T/TA  | 0.27 | 0.994 | 1.97E-09 | 0.94 (0.92,0.96) | 9.25E-09 | 0.93 (0.91,0.95) | 0.137 | 0.97 (0.93,1.01) | 0.025287 | 5.83e-6 |
| rs9903444        | 53057893 | Imputed   | C/T   | 0.27 | 0.994 | 1.98E-09 | 0.94 (0.92,0.96) | 9.16E-09 | 0.93 (0.91,0.95) | 0.142 | 0.97 (0.93,1.01) | 0.023898 | 5.78e-6 |
| rs9902950        | 53057764 | Imputed   | A/T   | 0.27 | 0.992 | 1.99E-09 | 0.94 (0.92,0.96) | 9.01E-09 | 0.93 (0.91,0.95) | 0.138 | 0.97 (0.93,1.01) | 0.025725 | 5.75e-6 |
| rs9894529        | 53055246 | Imputed   | A/T   | 0.27 | 0.993 | 2.00E-09 | 0.94 (0.92,0.96) | 9.90E-09 | 0.93 (0.91,0.95) | 0.138 | 0.97 (0.93,1.01) | 0.025826 | 5.73e-6 |
| rs9890971        | 53059776 | Genotyped | A/T   | 0.27 | 1     | 2.01E-09 | 0.94 (0.92,0.96) | 1.03E-08 | 0.93 (0.91,0.95) | 0.138 | 0.97 (0.93,1.01) | 0.026026 | 5.71e-6 |
| rs28558726       | 53058676 | Genotyped | A/G   | 0.27 | 1     | 2.02E-09 | 0.94 (0.92,0.96) | 9.93E-09 | 0.93 (0.91,0.95) | 0.137 | 0.97 (0.93,1.01) | 0.025861 | 5.68e-6 |

|                  |          |           |             |      |       |          |                  |          |                  |        |                  |          |         |
|------------------|----------|-----------|-------------|------|-------|----------|------------------|----------|------------------|--------|------------------|----------|---------|
| rs6504950        | 53056471 | Genotyped | G/A         | 0.27 | 1     | 2.04E-09 | 0.94 (0.92,0.96) | 1.01E-08 | 0.93 (0.91,0.95) | 0.136  | 0.97 (0.93,1.01) | 0.026396 | 5.64e-6 |
| rs56348638       | 53064550 | Imputed   | C/T         | 0.27 | 0.992 | 2.05E-09 | 0.94 (0.92,0.96) | 9.23E-09 | 0.93 (0.91,0.95) | 0.139  | 0.97 (0.93,1.01) | 0.024889 | 5.6e-6  |
| rs35051208       | 53052568 | Imputed   | C/T         | 0.27 | 0.985 | 2.22E-09 | 0.94 (0.92,0.96) | 7.87E-09 | 0.93 (0.91,0.95) | 0.149  | 0.97 (0.93,1.01) | 0.02461  | 5.18e-6 |
| rs9915183        | 53047137 | Genotyped | G/A         | 0.27 | 1     | 2.27E-09 | 0.94 (0.92,0.96) | 1.10E-08 | 0.93 (0.91,0.95) | 0.139  | 0.97 (0.93,1.01) | 0.026962 | 5.07e-6 |
| chr17:53061695:D | 53061695 | Imputed   | TTTTTC/T    | 0.27 | 0.961 | 2.39E-09 | 0.94 (0.92,0.96) | 1.17E-08 | 0.93 (0.91,0.95) | 0.123  | 0.97 (0.93,1.01) | 0.034389 | 4.81e-6 |
| rs8082471        | 53067993 | Imputed   | T/A         | 0.27 | 0.986 | 2.68E-09 | 0.94 (0.92,0.96) | 1.20E-08 | 0.93 (0.91,0.95) | 0.145  | 0.97 (0.93,1.01) | 0.025898 | 4.32e-6 |
| rs12940106       | 53067683 | Imputed   | A/G         | 0.27 | 0.982 | 2.98E-09 | 0.94 (0.92,0.96) | 8.69E-09 | 0.93 (0.91,0.95) | 0.17   | 0.97 (0.93,1.01) | 0.021875 | 3.88e-6 |
| chr17:53059774:I | 53059774 | Imputed   | T/TA        | 0.26 | 0.947 | 4.11E-09 | 0.94 (0.92,0.96) | 1.43E-08 | 0.93 (0.9,0.95)  | 0.129  | 0.97 (0.93,1.01) | 0.03286  | 2.85e-6 |
| rs9892848        | 53059775 | Imputed   | T/A         | 0.26 | 0.948 | 4.26E-09 | 0.94 (0.92,0.96) | 1.45E-08 | 0.93 (0.9,0.95)  | 0.129  | 0.97 (0.93,1.01) | 0.032976 | 2.75e-6 |
| chr17:53059776:I | 53059776 | Imputed   | A/AT        | 0.26 | 0.947 | 4.57E-09 | 0.94 (0.92,0.96) | 1.45E-08 | 0.93 (0.9,0.95)  | 0.133  | 0.97 (0.93,1.01) | 0.03062  | 2.57e-6 |
| rs28394892       | 53066545 | Imputed   | A/T         | 0.27 | 0.963 | 4.91E-09 | 0.94 (0.92,0.96) | 1.86E-08 | 0.93 (0.91,0.95) | 0.125  | 0.97 (0.93,1.01) | 0.037645 | 2.39e-6 |
| rs9895808        | 53048442 | Genotyped | C/G         | 0.27 | 1     | 8.75E-09 | 0.94 (0.92,0.96) | 4.07E-08 | 0.93 (0.91,0.96) | 0.157  | 0.97 (0.93,1.01) | 0.029415 | 1.36e-6 |
| rs2628298        | 53163478 | Genotyped | A/T         | 0.26 | 1     | 1.37E-08 | 0.94 (0.92,0.96) | 1.35E-08 | 0.93 (0.91,0.95) | 0.188  | 0.97 (0.93,1.01) | 0.037111 | 8.8e-7  |
| rs12952253       | 53005716 | Imputed   | A/G         | 0.29 | 0.988 | 1.88E-08 | 0.94 (0.92,0.96) | 1.66E-08 | 0.93 (0.91,0.95) | 0.0789 | 0.96 (0.93,1)    | 0.070695 | 6.48e-7 |
| ch17_pos53009280 | 53009280 | Genotyped | G/T         | 0.29 | 1     | 2.24E-08 | 0.94 (0.92,0.96) | 2.30E-08 | 0.93 (0.91,0.96) | 0.0735 | 0.96 (0.93,1)    | 0.077663 | 5.48e-7 |
| rs7208123        | 53006339 | Genotyped | G/A         | 0.29 | 1     | 2.30E-08 | 0.94 (0.92,0.96) | 2.15E-08 | 0.93 (0.91,0.96) | 0.0744 | 0.96 (0.93,1)    | 0.075566 | 5.32e-7 |
| chr17:53168208:D | 53168208 | Imputed   | G/GTGTGTGTC | 0.33 | 0.791 | 2.32E-08 | 0.94 (0.92,0.96) | 2.02E-08 | 0.93 (0.9,0.95)  | 0.0867 | 0.96 (0.92,1.01) | 0.088326 | 5.3e-7  |
| rs7209926        | 53006324 | Genotyped | A/G         | 0.29 | 1     | 2.42E-08 | 0.94 (0.92,0.96) | 3.46E-08 | 0.93 (0.91,0.96) | 0.0645 | 0.96 (0.93,1)    | 0.091482 | 5.07e-7 |
| rs9916547        | 53006890 | Imputed   | G/A         | 0.29 | 0.991 | 2.60E-08 | 0.94 (0.92,0.96) | 3.90E-08 | 0.93 (0.91,0.96) | 0.0636 | 0.96 (0.93,1)    | 0.093246 | 4.74e-7 |
| rs8065361        | 53008853 | Imputed   | A/T         | 0.29 | 0.993 | 2.60E-08 | 0.94 (0.92,0.96) | 3.77E-08 | 0.93 (0.91,0.96) | 0.0642 | 0.96 (0.93,1)    | 0.091554 | 4.73e-7 |
| rs34652394       | 53013367 | Imputed   | C/T         | 0.29 | 0.991 | 2.75E-08 | 0.94 (0.92,0.96) | 2.36E-08 | 0.93 (0.91,0.96) | 0.0793 | 0.96 (0.93,1)    | 0.071315 | 4.48e-7 |
| rs35465233       | 53013357 | Imputed   | G/A         | 0.29 | 0.992 | 2.78E-08 | 0.94 (0.92,0.96) | 2.37E-08 | 0.93 (0.91,0.96) | 0.0796 | 0.96 (0.93,1)    | 0.071168 | 4.43e-7 |

|                  |          |           |                 |      |       |          |                  |          |                  |        |                  |          |          |
|------------------|----------|-----------|-----------------|------|-------|----------|------------------|----------|------------------|--------|------------------|----------|----------|
| rs9912589        | 53009971 | Imputed   | G/A             | 0.29 | 0.993 | 2.80E-08 | 0.94 (0.92,0.96) | 3.93E-08 | 0.93 (0.91,0.96) | 0.0634 | 0.96 (0.92,1)    | 0.092733 | 4.4e-7   |
| rs9900816        | 53012057 | Genotyped | G/A             | 0.29 | 1     | 2.81E-08 | 0.94 (0.92,0.96) | 4.13E-08 | 0.93 (0.91,0.96) | 0.0676 | 0.96 (0.93,1)    | 0.091235 | 4.38e-7  |
| rs17745183       | 53013595 | Imputed   | G/T             | 0.29 | 0.991 | 2.83E-08 | 0.94 (0.92,0.96) | 2.42E-08 | 0.93 (0.91,0.96) | 0.0796 | 0.96 (0.93,1)    | 0.071434 | 4.37e-7  |
| rs12603899       | 53010098 | Genotyped | T/C             | 0.29 | 1     | 2.88E-08 | 0.94 (0.92,0.96) | 3.99E-08 | 0.93 (0.91,0.96) | 0.068  | 0.96 (0.93,1)    | 0.09014  | 4.29e-7  |
| rs9891704        | 53010755 | Genotyped | A/G             | 0.29 | 1     | 2.91E-08 | 0.94 (0.92,0.96) | 3.96E-08 | 0.93 (0.91,0.96) | 0.0684 | 0.96 (0.93,1)    | 0.090802 | 4.25e-7  |
| rs9907961        | 53012927 | Genotyped | C/G             | 0.29 | 1     | 2.91E-08 | 0.94 (0.92,0.96) | 4.13E-08 | 0.93 (0.91,0.96) | 0.0645 | 0.96 (0.93,1)    | 0.094821 | 4.25e-7  |
| rs9909096        | 53013289 | Imputed   | G/T             | 0.29 | 0.993 | 3.38E-08 | 0.94 (0.92,0.96) | 4.77E-08 | 0.93 (0.91,0.96) | 0.0674 | 0.96 (0.93,1)    | 0.093011 | 3.67e-7  |
| ch17_pos52975265 | 52975265 | Genotyped | C/G             | 0.19 | 1     | 5.30E-08 | 0.94 (0.91,0.96) | 7.25E-08 | 0.92 (0.9,0.95)  | 0.0453 | 0.95 (0.91,1)    | 0.183278 | 2.37e-7  |
| rs35647022       | 53008071 | Imputed   | C/T             | 0.27 | 0.986 | 8.79E-08 | 0.94 (0.92,0.96) | 9.34E-08 | 0.93 (0.91,0.96) | 0.139  | 0.97 (0.93,1.01) | 0.045415 | 1.45e-7  |
| chr17:53035381:D | 53035381 | Imputed   | CTGAGGCCTGCAA/C | 0.27 | 0.983 | 9.97E-08 | 0.94 (0.92,0.96) | 1.13E-07 | 0.93 (0.91,0.96) | 0.131  | 0.97 (0.93,1.01) | 0.049383 | 1.29e-7  |
| ch17_pos52974643 | 52974643 | Genotyped | G/C             | 0.15 | 1     | 1.02E-07 | 0.93 (0.91,0.96) | 5.68E-07 | 0.92 (0.89,0.95) | 0.125  | 0.96 (0.91,1.01) | 0.1105   | 1.26e-7  |
| rs17817877       | 53034628 | Imputed   | T/A             | 0.27 | 0.991 | 1.29E-07 | 0.94 (0.92,0.96) | 1.54E-07 | 0.94 (0.91,0.96) | 0.153  | 0.97 (0.93,1.01) | 0.044523 | 1,00E-07 |
| rs9895901        | 52984885 | Genotyped | A/G             | 0.3  | 1     | 1.70E-07 | 0.95 (0.93,0.97) | 1.82E-07 | 0.94 (0.91,0.96) | 0.105  | 0.97 (0.93,1.01) | 0.083674 | 7.66e-8  |
| rs9904377        | 52985982 | Genotyped | G/A             | 0.3  | 1     | 1.78E-07 | 0.95 (0.93,0.97) | 1.79E-07 | 0.94 (0.91,0.96) | 0.104  | 0.97 (0.93,1.01) | 0.085355 | 7.35e-8  |
| rs2958913        | 52976942 | Genotyped | G/C             | 0.2  | 1     | 1.84E-07 | 0.94 (0.92,0.96) | 1.78E-07 | 0.93 (0.9,0.95)  | 0.057  | 0.96 (0.91,1)    | 0.199376 | 7.12e-8  |
| rs2877634        | 52987545 | Imputed   | A/G             | 0.31 | 0.984 | 1.91E-07 | 0.95 (0.93,0.97) | 1.83E-07 | 0.94 (0.92,0.96) | 0.0914 | 0.97 (0.93,1.01) | 0.098864 | 6.85e-8  |
| chr17:52992128:D | 52992128 | Imputed   | TA/T            | 0.3  | 0.981 | 1.91E-07 | 0.95 (0.93,0.97) | 1.95E-07 | 0.94 (0.91,0.96) | 0.104  | 0.97 (0.93,1.01) | 0.083135 | 6.87e-8  |
| rs7214573        | 53006654 | Genotyped | T/C             | 0.27 | 1     | 2.02E-07 | 0.95 (0.93,0.97) | 2.32E-07 | 0.94 (0.91,0.96) | 0.131  | 0.97 (0.93,1.01) | 0.059508 | 6.5e-8   |
| chr17:53030584:I | 53030584 | Imputed   | C/CA            | 0.27 | 0.994 | 2.04E-07 | 0.95 (0.93,0.97) | 2.29E-07 | 0.94 (0.91,0.96) | 0.158  | 0.97 (0.93,1.01) | 0.051159 | 6.44e-8  |
| chr17:53067647:D | 53067647 | Imputed   | TCAGGCGACA/T    | 0.26 | 0.957 | 2.14E-07 | 0.94 (0.92,0.96) | 7.95E-07 | 0.94 (0.91,0.96) | 0.175  | 0.97 (0.93,1.01) | 0.074036 | 6.15e-8  |
| chr17:53041890:D | 53041890 | Imputed   | TACTTTA/T       | 0.27 | 0.988 | 2.21E-07 | 0.95 (0.93,0.97) | 3.02E-07 | 0.94 (0.91,0.96) | 0.152  | 0.97 (0.93,1.01) | 0.057636 | 5.97e-8  |
| rs8071094        | 53086937 | Genotyped | C/T             | 0.1  | 1     | 2.22E-07 | 0.92 (0.89,0.95) | 1.06E-05 | 0.92 (0.89,0.96) | 0.0613 | 0.94 (0.89,1)    | 0.538967 | 5.92e-8  |

|                  |          |           |         |      |       |          |                  |          |                  |        |                  |          |         |
|------------------|----------|-----------|---------|------|-------|----------|------------------|----------|------------------|--------|------------------|----------|---------|
| chr17:53044475:I | 53044475 | Imputed   | T/TA    | 0.27 | 0.977 | 2.23E-07 | 0.95 (0.93,0.97) | 3.07E-07 | 0.94 (0.91,0.96) | 0.159  | 0.97 (0.93,1.01) | 0.056581 | 5.9e-8  |
| rs12937006       | 53030461 | Genotyped | C/T     | 0.27 | 1     | 2.24E-07 | 0.95 (0.93,0.97) | 2.78E-07 | 0.94 (0.91,0.96) | 0.15   | 0.97 (0.93,1.01) | 0.053969 | 5.89e-8 |
| rs9889559        | 52983722 | Imputed   | T/C     | 0.3  | 0.992 | 2.26E-07 | 0.95 (0.93,0.97) | 3.82E-07 | 0.94 (0.92,0.96) | 0.0805 | 0.97 (0.93,1)    | 0.130636 | 5.82e-8 |
| rs9913784        | 52989071 | Genotyped | A/T     | 0.3  | 1     | 2.26E-07 | 0.95 (0.93,0.97) | 2.28E-07 | 0.94 (0.91,0.96) | 0.0934 | 0.97 (0.93,1.01) | 0.093189 | 5.83e-8 |
| rs12949538       | 53010670 | Genotyped | C/T     | 0.27 | 1     | 2.28E-07 | 0.95 (0.93,0.97) | 2.61E-07 | 0.94 (0.91,0.96) | 0.135  | 0.97 (0.93,1.01) | 0.059804 | 5.77e-8 |
| rs35097996       | 53021923 | Imputed   | T/C     | 0.27 | 0.993 | 2.29E-07 | 0.95 (0.93,0.97) | 3.06E-07 | 0.94 (0.91,0.96) | 0.126  | 0.97 (0.93,1.01) | 0.064026 | 5.76e-8 |
| rs17745189       | 53013980 | Genotyped | A/G     | 0.27 | 1     | 2.34E-07 | 0.95 (0.93,0.97) | 2.67E-07 | 0.94 (0.91,0.96) | 0.141  | 0.97 (0.93,1.01) | 0.057168 | 5.64e-8 |
| rs3087650        | 53029328 | Genotyped | G/A     | 0.27 | 1     | 2.36E-07 | 0.95 (0.93,0.97) | 2.81E-07 | 0.94 (0.91,0.96) | 0.155  | 0.97 (0.93,1.01) | 0.052747 | 5.6e-8  |
| rs8066588        | 53025689 | Genotyped | C/T     | 0.27 | 1     | 2.37E-07 | 0.95 (0.93,0.97) | 2.91E-07 | 0.94 (0.91,0.96) | 0.14   | 0.97 (0.93,1.01) | 0.054664 | 5.57e-8 |
| rs8076984        | 53035428 | Imputed   | T/C     | 0.27 | 0.996 | 2.39E-07 | 0.95 (0.93,0.97) | 2.75E-07 | 0.94 (0.91,0.96) | 0.158  | 0.97 (0.93,1.01) | 0.051294 | 5.53e-8 |
| rs9908752        | 52983216 | Genotyped | C/T     | 0.3  | 1     | 2.40E-07 | 0.95 (0.93,0.97) | 3.83E-07 | 0.94 (0.92,0.96) | 0.0764 | 0.96 (0.93,1)    | 0.14129  | 5.5e-8  |
| rs8066833        | 53025475 | Imputed   | A/G     | 0.27 | 0.994 | 2.43E-07 | 0.95 (0.93,0.97) | 3.12E-07 | 0.94 (0.91,0.96) | 0.132  | 0.97 (0.93,1.01) | 0.061724 | 5.44e-8 |
| rs17817847       | 53018281 | Imputed   | T/A     | 0.27 | 0.993 | 2.44E-07 | 0.95 (0.93,0.97) | 3.27E-07 | 0.94 (0.91,0.96) | 0.132  | 0.97 (0.93,1.01) | 0.061394 | 5.42e-8 |
| rs12949718       | 52981853 | Genotyped | C/T     | 0.31 | 1     | 2.49E-07 | 0.95 (0.93,0.97) | 3.76E-07 | 0.94 (0.92,0.96) | 0.0787 | 0.97 (0.93,1)    | 0.143385 | 5.32e-8 |
| chr17:53035494:D | 53035494 | Imputed   | GA/G    | 0.27 | 0.992 | 2.49E-07 | 0.95 (0.93,0.97) | 2.77E-07 | 0.94 (0.91,0.96) | 0.163  | 0.97 (0.93,1.01) | 0.05085  | 5.31e-8 |
| rs12936860       | 53030226 | Genotyped | G/A     | 0.27 | 1     | 2.50E-07 | 0.95 (0.93,0.97) | 3.00E-07 | 0.94 (0.91,0.96) | 0.156  | 0.97 (0.93,1.01) | 0.05249  | 5.28e-8 |
| rs9910653        | 52992268 | Genotyped | G/A     | 0.31 | 1     | 2.59E-07 | 0.95 (0.93,0.97) | 2.38E-07 | 0.94 (0.92,0.96) | 0.0965 | 0.97 (0.93,1.01) | 0.111745 | 5.12e-8 |
| chr17:53016155:D | 53016155 | Imputed   | CTT/C   | 0.27 | 0.993 | 2.61E-07 | 0.95 (0.93,0.97) | 3.73E-07 | 0.94 (0.91,0.96) | 0.136  | 0.97 (0.93,1.01) | 0.062538 | 5.07e-8 |
| rs17817901       | 53038745 | Imputed   | A/G     | 0.27 | 0.995 | 2.66E-07 | 0.95 (0.93,0.97) | 2.96E-07 | 0.94 (0.91,0.96) | 0.161  | 0.97 (0.93,1.01) | 0.052265 | 4.99e-8 |
| chr17:53026823:D | 53026823 | Imputed   | TAAAG/T | 0.27 | 0.992 | 2.79E-07 | 0.95 (0.93,0.97) | 3.01E-07 | 0.94 (0.91,0.96) | 0.15   | 0.97 (0.93,1.01) | 0.054805 | 4.76e-8 |
| rs12150038       | 53041520 | Genotyped | T/G     | 0.27 | 1     | 2.82E-07 | 0.95 (0.93,0.97) | 3.40E-07 | 0.94 (0.91,0.96) | 0.163  | 0.97 (0.93,1.01) | 0.052667 | 4.71e-8 |
| rs9914088        | 52979985 | Genotyped | T/C     | 0.3  | 1     | 2.84E-07 | 0.95 (0.93,0.97) | 4.88E-07 | 0.94 (0.92,0.96) | 0.076  | 0.96 (0.93,1)    | 0.147245 | 4.68e-8 |

|                  |          |           |            |      |       |          |                  |          |                  |        |                  |          |          |
|------------------|----------|-----------|------------|------|-------|----------|------------------|----------|------------------|--------|------------------|----------|----------|
| rs1802212        | 53038654 | Genotyped | A/C        | 0.27 | 1     | 2.85E-07 | 0.95 (0.93,0.97) | 3.36E-07 | 0.94 (0.91,0.96) | 0.157  | 0.97 (0.93,1.01) | 0.05377  | 4.66e-8  |
| rs8073158        | 53028615 | Imputed   | C/A        | 0.27 | 0.993 | 2.89E-07 | 0.95 (0.93,0.97) | 3.41E-07 | 0.94 (0.91,0.96) | 0.15   | 0.97 (0.93,1.01) | 0.057298 | 4.6e-8   |
| rs17745231       | 53036529 | Genotyped | C/G        | 0.27 | 1     | 3.00E-07 | 0.95 (0.93,0.97) | 3.42E-07 | 0.94 (0.91,0.96) | 0.161  | 0.97 (0.93,1.01) | 0.052315 | 4.43e-8  |
| rs12938118       | 53037359 | Genotyped | T/C        | 0.27 | 1     | 3.10E-07 | 0.95 (0.93,0.97) | 3.51E-07 | 0.94 (0.91,0.96) | 0.161  | 0.97 (0.93,1.01) | 0.052537 | 4.3e-8   |
| rs12602751       | 52994174 | Genotyped | C/A        | 0.31 | 1     | 3.11E-07 | 0.95 (0.93,0.97) | 3.32E-07 | 0.94 (0.92,0.96) | 0.0889 | 0.97 (0.93,1.01) | 0.119844 | 4.29e-8  |
| rs12937760       | 53016130 | Genotyped | G/T        | 0.27 | 1     | 3.11E-07 | 0.95 (0.93,0.97) | 3.72E-07 | 0.94 (0.91,0.96) | 0.155  | 0.97 (0.93,1.01) | 0.0542   | 4.29e-8  |
| rs7216138        | 52995664 | Genotyped | G/A        | 0.31 | 1     | 3.24E-07 | 0.95 (0.93,0.97) | 3.22E-07 | 0.94 (0.92,0.96) | 0.0892 | 0.97 (0.93,1.01) | 0.118214 | 4.12e-8  |
| rs12951542       | 53041965 | Genotyped | T/C        | 0.27 | 1     | 3.25E-07 | 0.95 (0.93,0.97) | 4.00E-07 | 0.94 (0.91,0.96) | 0.161  | 0.97 (0.93,1.01) | 0.055946 | 4.11e-8  |
| ch17_pos53017747 | 53017747 | Genotyped | A/G        | 0.27 | 1     | 3.69E-07 | 0.95 (0.93,0.97) | 4.03E-07 | 0.94 (0.91,0.96) | 0.141  | 0.97 (0.93,1.01) | 0.060556 | 3.64e-8  |
| chr17:53041892:D | 53041892 | Imputed   | CTTTAACT/C | 0.27 | 0.986 | 4.48E-07 | 0.95 (0.93,0.97) | 5.12E-07 | 0.94 (0.91,0.96) | 0.16   | 0.97 (0.93,1.01) | 0.061572 | 3.01e-8  |
| rs17712917       | 53271365 | Imputed   | T/G        | 0.22 | 0.991 | 4.50E-07 | 0.94 (0.92,0.96) | 1.79E-07 | 0.93 (0.91,0.96) | 0.285  | 0.98 (0.93,1.02) | 0.016876 | 3,00E-08 |
| rs7212321        | 53258437 | Genotyped | C/G        | 0.22 | 1     | 4.95E-07 | 0.94 (0.92,0.96) | 1.21E-07 | 0.93 (0.9,0.96)  | 0.315  | 0.98 (0.94,1.02) | 0.012958 | 2.74e-8  |
| rs8075983        | 53271918 | Genotyped | G/A        | 0.22 | 1     | 5.06E-07 | 0.94 (0.92,0.96) | 2.58E-07 | 0.93 (0.91,0.96) | 0.27   | 0.98 (0.93,1.02) | 0.020872 | 2.68e-8  |
| rs714896         | 53256982 | Imputed   | T/C        | 0.22 | 0.99  | 5.12E-07 | 0.94 (0.92,0.96) | 1.22E-07 | 0.93 (0.9,0.95)  | 0.311  | 0.98 (0.93,1.02) | 0.012228 | 2.65e-8  |
| rs714897         | 53256579 | Genotyped | C/T        | 0.22 | 1     | 5.36E-07 | 0.94 (0.92,0.96) | 1.41E-07 | 0.93 (0.9,0.96)  | 0.333  | 0.98 (0.94,1.02) | 0.011172 | 2.53e-8  |
| rs9910034        | 52983596 | Imputed   | G/A        | 0.18 | 0.979 | 6.11E-07 | 0.94 (0.92,0.96) | 1.21E-06 | 0.93 (0.9,0.96)  | 0.0563 | 0.95 (0.91,1)    | 0.279546 | 2.23e-8  |
| rs9907270        | 53266415 | Genotyped | G/A        | 0.22 | 1     | 6.38E-07 | 0.94 (0.92,0.97) | 2.09E-07 | 0.93 (0.91,0.96) | 0.302  | 0.98 (0.93,1.02) | 0.013714 | 2.14e-8  |
| rs9914836        | 52997875 | Genotyped | C/G        | 0.28 | 1     | 7.11E-07 | 0.95 (0.93,0.97) | 1.27E-06 | 0.94 (0.92,0.96) | 0.105  | 0.97 (0.93,1.01) | 0.10606  | 1.93e-8  |
| chr17:52998317:I | 52998317 | Imputed   | G/GAC      | 0.29 | 0.984 | 7.43E-07 | 0.95 (0.93,0.97) | 1.08E-06 | 0.94 (0.92,0.96) | 0.0934 | 0.97 (0.93,1.01) | 0.121049 | 1.85e-8  |
| rs9915913        | 52998168 | Genotyped | G/T        | 0.29 | 1     | 7.98E-07 | 0.95 (0.93,0.97) | 1.03E-06 | 0.94 (0.92,0.96) | 0.106  | 0.97 (0.93,1.01) | 0.106638 | 1.73e-8  |
| rs59623427       | 53121907 | Imputed   | T/C        | 0.46 | 0.984 | 8.01E-07 | 0.95 (0.94,0.97) | 1.55E-06 | 0.95 (0.93,0.97) | 0.16   | 0.97 (0.94,1.01) | 0.280645 | 1.72e-8  |
| rs7208403        | 53046667 | Genotyped | C/A        | 0.4  | 1     | 1.01E-06 | 0.95 (0.93,0.97) | 9.52E-06 | 0.95 (0.93,0.97) | 0.183  | 0.97 (0.94,1.01) | 0.249619 | 1.37e-8  |

|                  |          |           |         |      |       |          |                  |          |                  |        |                  |          |          |
|------------------|----------|-----------|---------|------|-------|----------|------------------|----------|------------------|--------|------------------|----------|----------|
| rs7226272        | 53046447 | Genotyped | G/A     | 0.4  | 1     | 1.08E-06 | 0.95 (0.93,0.97) | 9.71E-06 | 0.95 (0.93,0.97) | 0.182  | 0.97 (0.94,1.01) | 0.258887 | 1.29e-8  |
| rs9914596        | 52996551 | Genotyped | C/T     | 0.29 | 1     | 1.11E-06 | 0.95 (0.93,0.97) | 1.26E-06 | 0.94 (0.92,0.96) | 0.119  | 0.97 (0.93,1.01) | 0.099011 | 1.25e-8  |
| rs12937360       | 53046298 | Genotyped | C/T     | 0.4  | 1     | 1.21E-06 | 0.95 (0.94,0.97) | 1.01E-05 | 0.95 (0.93,0.97) | 0.196  | 0.98 (0.94,1.01) | 0.24398  | 1.16e-8  |
| rs35079296       | 52994210 | Genotyped | T/G     | 0.29 | 1     | 1.29E-06 | 0.95 (0.93,0.97) | 1.62E-06 | 0.94 (0.92,0.97) | 0.118  | 0.97 (0.93,1.01) | 0.116142 | 1.09e-8  |
| rs66898273       | 52993956 | Imputed   | C/T     | 0.29 | 0.991 | 1.38E-06 | 0.95 (0.93,0.97) | 1.78E-06 | 0.94 (0.92,0.97) | 0.115  | 0.97 (0.93,1.01) | 0.122404 | 1.02e-8  |
| rs72831295       | 53043804 | Imputed   | T/C     | 0.28 | 0.985 | 1.47E-06 | 0.95 (0.93,0.97) | 1.36E-06 | 0.94 (0.92,0.96) | 0.147  | 0.97 (0.93,1.01) | 0.097356 | 9.6e-9   |
| rs1962045        | 52996150 | Genotyped | C/T     | 0.29 | 1     | 1.50E-06 | 0.95 (0.93,0.97) | 1.84E-06 | 0.94 (0.92,0.97) | 0.122  | 0.97 (0.93,1.01) | 0.113386 | 9.4e-9   |
| rs9897646        | 52985351 | Genotyped | G/C     | 0.28 | 1     | 1.64E-06 | 0.95 (0.93,0.97) | 1.98E-06 | 0.94 (0.92,0.97) | 0.161  | 0.97 (0.93,1.01) | 0.081252 | 8.63e-9  |
| rs17745123       | 52988232 | Genotyped | G/T     | 0.28 | 1     | 1.64E-06 | 0.95 (0.93,0.97) | 2.00E-06 | 0.94 (0.92,0.97) | 0.146  | 0.97 (0.93,1.01) | 0.08771  | 8.65e-9  |
| rs9899602        | 52986908 | Genotyped | T/C     | 0.28 | 1     | 1.66E-06 | 0.95 (0.93,0.97) | 2.00E-06 | 0.94 (0.92,0.97) | 0.163  | 0.97 (0.93,1.01) | 0.082072 | 8.52e-9  |
| rs9899545        | 52986845 | Genotyped | T/C     | 0.28 | 1     | 1.67E-06 | 0.95 (0.93,0.97) | 2.02E-06 | 0.94 (0.92,0.97) | 0.153  | 0.97 (0.93,1.01) | 0.087512 | 8.46e-9  |
| rs28564882       | 52989598 | Genotyped | C/T     | 0.29 | 1     | 1.70E-06 | 0.95 (0.93,0.97) | 2.27E-06 | 0.94 (0.92,0.97) | 0.0988 | 0.97 (0.93,1.01) | 0.143936 | 8.36e-9  |
| rs2628297        | 53164243 | Imputed   | A/G     | 0.47 | 0.986 | 1.76E-06 | 0.95 (0.94,0.97) | 4.34E-06 | 0.95 (0.93,0.97) | 0.165  | 0.97 (0.94,1.01) | 0.344238 | 8.09e-9  |
| rs2628300        | 53160154 | Genotyped | A/G     | 0.47 | 1     | 2.66E-06 | 0.96 (0.94,0.97) | 6.02E-06 | 0.95 (0.93,0.97) | 0.179  | 0.98 (0.94,1.01) | 0.341058 | 5.42e-9  |
| rs12449786       | 53085570 | Genotyped | A/C     | 0.47 | 1     | 2.75E-06 | 0.96 (0.94,0.97) | 6.17E-06 | 0.95 (0.93,0.97) | 0.159  | 0.97 (0.94,1.01) | 0.36557  | 5.24e-9  |
| rs2541235        | 53157394 | Genotyped | T/C     | 0.47 | 1     | 3.03E-06 | 0.96 (0.94,0.97) | 7.31E-06 | 0.95 (0.93,0.97) | 0.179  | 0.98 (0.94,1.01) | 0.357866 | 4.78e-9  |
| rs2628302        | 53158361 | Genotyped | A/G     | 0.47 | 1     | 3.55E-06 | 0.96 (0.94,0.97) | 8.23E-06 | 0.95 (0.93,0.97) | 0.188  | 0.98 (0.94,1.01) | 0.36058  | 4.11e-9  |
| rs2787491        | 53206519 | Imputed   | G/C     | 0.44 | 0.924 | 1.37E-05 | 1.05 (1.02,1.07) | 5.57E-07 | 1.06 (1.04,1.09) | 0.655  | 1.01 (0.97,1.05) | 0.001351 | 1.13e-9  |
| chr17:53195938:D | 53195938 | Imputed   | A/AAATG | 0.43 | 0.904 | 1.43E-05 | 1.05 (1.02,1.07) | 3.34E-07 | 1.06 (1.04,1.09) | 0.673  | 1.01 (0.97,1.05) | 0.001166 | 1.09e-9  |
| rs2958915        | 52975892 | Genotyped | G/T     | 0.43 | 1     | 4.47E-05 | 0.96 (0.94,0.98) | 9.48E-05 | 0.96 (0.94,0.98) | 0.116  | 0.97 (0.94,1.01) | 0.572598 | 3.67e-10 |
| rs244375         | 53183659 | Imputed   | A/G     | 0.38 | 0.926 | 6.73E-05 | 1.04 (1.02,1.06) | 1.47E-06 | 1.06 (1.04,1.09) | 0.993  | 1 (0.96,1.04)    | 0.000426 | 2.49e-10 |
| rs8080876        | 53175267 | Genotyped | T/C     | 0.41 | 1     | 6.82E-05 | 1.04 (1.02,1.06) | 3.09E-06 | 1.06 (1.03,1.08) | 0.652  | 1.01 (0.97,1.05) | 0.002776 | 2.46e-10 |

|                  |          |           |         |      |       |          |                  |          |                  |       |               |          |          |
|------------------|----------|-----------|---------|------|-------|----------|------------------|----------|------------------|-------|---------------|----------|----------|
| rs2787487        | 53209382 | Imputed   | C/G     | 0.4  | 0.99  | 7.92E-05 | 1.04 (1.02,1.06) | 1.61E-06 | 1.06 (1.03,1.08) | 0.967 | 1 (0.96,1.04) | 0.000563 | 2.13e-10 |
| rs2787504        | 53178341 | Genotyped | A/G     | 0.4  | 1     | 8.91E-05 | 1.04 (1.02,1.06) | 2.39E-06 | 1.06 (1.03,1.08) | 0.835 | 1 (0.97,1.04) | 0.000963 | 1.91e-10 |
| rs2529508        | 53212572 | Imputed   | T/A     | 0.41 | 0.981 | 9.50E-05 | 1.04 (1.02,1.06) | 2.21E-06 | 1.06 (1.03,1.08) | 0.884 | 1 (0.97,1.04) | 0.000924 | 1.8e-10  |
| rs244347         | 53196350 | Imputed   | G/T     | 0.4  | 0.985 | 9.69E-05 | 1.04 (1.02,1.06) | 2.20E-06 | 1.06 (1.03,1.08) | 0.924 | 1 (0.96,1.04) | 0.000793 | 1.76e-10 |
| rs2787484        | 53210120 | Genotyped | T/C     | 0.4  | 1     | 9.72E-05 | 1.04 (1.02,1.06) | 2.07E-06 | 1.06 (1.03,1.08) | 0.917 | 1 (0.97,1.04) | 0.000791 | 1.76e-10 |
| chr17:53195933:D | 53195933 | Imputed   | G/GAAAT | 0.4  | 0.992 | 9.77E-05 | 1.04 (1.02,1.06) | 2.11E-06 | 1.06 (1.03,1.08) | 0.924 | 1 (0.96,1.04) | 0.000814 | 1.75e-10 |
| rs2787474        | 53214634 | Imputed   | C/T     | 0.4  | 0.993 | 9.83E-05 | 1.04 (1.02,1.06) | 2.35E-06 | 1.06 (1.03,1.08) | 0.894 | 1 (0.97,1.04) | 0.00087  | 1.74e-10 |
| rs2529505        | 53206808 | Imputed   | A/G     | 0.4  | 0.992 | 9.88E-05 | 1.04 (1.02,1.06) | 1.97E-06 | 1.06 (1.03,1.08) | 0.885 | 1 (0.97,1.04) | 0.000858 | 1.73e-10 |
| rs171513         | 53190426 | Genotyped | G/A     | 0.4  | 1     | 9.90E-05 | 1.04 (1.02,1.06) | 2.04E-06 | 1.06 (1.03,1.08) | 0.925 | 1 (0.96,1.04) | 0.000732 | 1.73e-10 |
| rs244354         | 53194142 | Genotyped | T/C     | 0.4  | 1     | 1.00E-04 | 1.04 (1.02,1.06) | 2.03E-06 | 1.06 (1.03,1.08) | 0.949 | 1 (0.96,1.04) | 0.000675 | 1.71e-10 |
| rs244341         | 53198922 | Genotyped | A/G     | 0.4  | 1     | 1.00E-04 | 1.04 (1.02,1.06) | 2.20E-06 | 1.06 (1.03,1.08) | 0.929 | 1 (0.96,1.04) | 0.000784 | 1.71e-10 |

a: Build 37 coordinates on chromosome 17.

b: Major and minor allele.

c: Minor allele frequency.

d: IMPUTE2 info score.

e: P-value, Odds ratio (OR) and 95% Confidence Interval (CI) for association with Overall Breast Cancer Risk, Estrogen Positive (ER+) and Estrogen Negative (ER-) disease.

f: Case-only analysis, treating subtype status as a dependent variable, models adjusted for principal components and per-study fixed-effects.

g: Relative Likelihood with respect to lead SNP rs2787486.



**Supplementary Table 2: Markers correlated ( $r^2 > 0.6$ ) with, and likelihood ratio (RL) of <1:100 relative to rs2787486 with respect to overall Risk.**

| SNP              | Position <sup>a</sup> | Type      | Maj/Min <sup>b</sup> | MAF <sup>c</sup> | Info <sup>d</sup> | Rsq <sup>e</sup> | Overall Risk <sup>f</sup> |                  | ER+ <sup>f</sup> |                  | ER- <sup>f</sup> |                  | Heterogeneity <sup>g</sup> |
|------------------|-----------------------|-----------|----------------------|------------------|-------------------|------------------|---------------------------|------------------|------------------|------------------|------------------|------------------|----------------------------|
|                  |                       |           |                      |                  |                   |                  | P-value                   | OR (95%CI)       | P-value          | OR (95%CI)       | P-value          | OR (95%CI)       | P-value                    |
| rs2787497        | 53176211              | Genotyped | A/G                  | 0.27             | 1                 | 0.89             | 9.27E-13                  | 0.93 (0.91,0.95) | 3.52E-13         | 0.91 (0.89,0.93) | 0.0702           | 0.96 (0.92,1.00) | 0.007                      |
| rs8082622        | 53177567              | Genotyped | C/T                  | 0.27             | 1                 | 0.9              | 7.06E-13                  | 0.93 (0.91,0.94) | 6.24E-13         | 0.91 (0.89,0.94) | 0.0528           | 0.96 (0.92,1.00) | 0.011                      |
| rs2529510        | 53182046              | Imputed   | T/A                  | 0.3              | 0.91              | 0.84             | 6.92E-14                  | 0.92 (0.90,0.94) | 2.08E-14         | 0.91 (0.88,0.93) | 0.0645           | 0.96 (0.92,1.00) | 0.007                      |
| rs244373         | 53184949              | Imputed   | C/T                  | 0.29             | 0.98              | 0.99             | 7.30E-14                  | 0.92 (0.90,0.94) | 7.84E-14         | 0.91 (0.89,0.93) | 0.0315           | 0.96 (0.92,1.00) | 0.012                      |
| rs244358         | 53192231              | Genotyped | C/T                  | 0.27             | 1                 | 0.89             | 9.68E-13                  | 0.93 (0.91,0.95) | 2.97E-13         | 0.91 (0.89,0.93) | 0.0893           | 0.97 (0.93,1.01) | 0.005                      |
| rs187242         | 53192946              | Imputed   | T/A                  | 0.29             | 0.98              | 0.98             | 8.17E-13                  | 0.93 (0.91,0.95) | 2.65E-12         | 0.92 (0.89,0.94) | 0.0278           | 0.96 (0.92,1.00) | 0.030                      |
| rs244353         | 53194769              | Genotyped | G/A                  | 0.29             | 1                 | 0.99             | 5.75E-14                  | 0.92 (0.90,0.94) | 5.96E-14         | 0.91 (0.89,0.93) | 0.0275           | 0.96 (0.92,1.00) | 0.015                      |
| rs244348         | 53196291              | Genotyped | G/A                  | 0.27             | 1                 | 0.9              | 7.08E-13                  | 0.93 (0.91,0.94) | 5.20E-13         | 0.91 (0.89,0.93) | 0.0547           | 0.96 (0.92,1.00) | 0.011                      |
| rs244342         | 53198407              | Genotyped | C/T                  | 0.29             | 1                 | 0.99             | 6.73E-14                  | 0.92 (0.90,0.94) | 7.48E-14         | 0.91 (0.89,0.93) | 0.03             | 0.96 (0.92,1.00) | 0.015                      |
| rs244338         | 53200418              | Genotyped | G/A                  | 0.29             | 1                 | 0.99             | 6.21E-14                  | 0.92 (0.90,0.94) | 6.70E-14         | 0.91 (0.89,0.93) | 0.0276           | 0.96 (0.92,1.00) | 0.016                      |
| rs244337         | 53201124              | Imputed   | G/T                  | 0.29             | 0.99              | 0.99             | 6.60E-14                  | 0.92 (0.90,0.94) | 6.29E-14         | 0.91 (0.89,0.93) | 0.0304           | 0.96 (0.92,1.00) | 0.014                      |
| rs244336         | 53201502              | Genotyped | G/A                  | 0.27             | 1                 | 0.9              | 8.80E-13                  | 0.93 (0.91,0.95) | 7.60E-13         | 0.91 (0.89,0.94) | 0.047            | 0.96 (0.92,1.00) | 0.013                      |
| chr17:53205761:D | 53205761              | Imputed   | AT/A                 | 0.27             | 0.99              | 0.9              | 9.42E-13                  | 0.93 (0.91,0.95) | 7.95E-13         | 0.91 (0.89,0.94) | 0.0552           | 0.96 (0.92,1.00) | 0.012                      |
| rs2628321        | 53205917              | Genotyped | A/G                  | 0.29             | 1                 | 0.99             | 5.88E-14                  | 0.92 (0.90,0.94) | 7.01E-14         | 0.91 (0.89,0.93) | 0.0277           | 0.96 (0.92,1.00) | 0.015                      |
| rs2787486        | 53209774              | Imputed   | A/C                  | 0.28             | 0.96              | -                | 8.96E-15                  | 0.92 (0.90,0.94) | 1.39E-14         | 0.91 (0.88,0.93) | 0.0177           | 0.95 (0.91,0.99) | 0.017                      |
| rs2787481        | 53211110              | Genotyped | T/C                  | 0.27             | 1                 | 0.9              | 6.44E-13                  | 0.92 (0.91,0.94) | 2.93E-13         | 0.91 (0.89,0.93) | 0.0637           | 0.96 (0.92,1.00) | 0.008                      |
| rs244315         | 53214654              | Genotyped | C/T                  | 0.27             | 1                 | 0.9              | 4.72E-13                  | 0.92 (0.91,0.94) | 4.27E-13         | 0.91 (0.89,0.93) | 0.0493           | 0.96 (0.92,1.00) | 0.011                      |
| rs244317         | 53216985              | Genotyped | A/T                  | 0.27             | 1                 | 0.9              | 5.79E-13                  | 0.92 (0.91,0.94) | 2.74E-13         | 0.91 (0.89,0.93) | 0.0649           | 0.96 (0.92,1.00) | 0.008                      |
| rs2628316        | 53219837              | Genotyped | A/G                  | 0.29             | 1                 | 0.99             | 6.00E-14                  | 0.92 (0.90,0.94) | 1.17E-13         | 0.91 (0.89,0.93) | 0.0276           | 0.96 (0.92,1.00) | 0.016                      |
| chr17:53221365:I | 53221365              | Imputed   | T/TGC                | 0.29             | 0.98              | 0.99             | 9.68E-14                  | 0.92 (0.90,0.94) | 1.44E-13         | 0.91 (0.89,0.93) | 0.0254           | 0.95 (0.92,0.99) | 0.018                      |
| rs244318         | 53221368              | Imputed   | A/G                  | 0.29             | 0.98              | 0.97             | 4.19E-13                  | 0.93 (0.91,0.95) | 3.56E-13         | 0.91 (0.89,0.94) | 0.036            | 0.96 (0.92,1.00) | 0.015                      |
| rs244319         | 53222874              | Genotyped | G/A                  | 0.29             | 1                 | 0.98             | 2.19E-13                  | 0.93 (0.91,0.94) | 4.18E-13         | 0.91 (0.89,0.94) | 0.028            | 0.96 (0.92,1.00) | 0.022                      |
| rs244320         | 53222920              | Genotyped | C/T                  | 0.29             | 1                 | 0.98             | 2.19E-13                  | 0.93 (0.91,0.94) | 4.18E-13         | 0.91 (0.89,0.94) | 0.028            | 0.96 (0.92,1.00) | 0.022                      |
| rs244321         | 53223998              | Imputed   | T/A                  | 0.29             | 0.99              | 0.98             | 1.72E-13                  | 0.92 (0.91,0.94) | 3.22E-13         | 0.91 (0.89,0.94) | 0.0245           | 0.95 (0.92,0.99) | 0.023                      |
| rs10432032       | 53224088              | Genotyped | A/G                  | 0.29             | 1                 | 0.98             | 2.47E-13                  | 0.93 (0.91,0.94) | 5.33E-13         | 0.91 (0.89,0.94) | 0.0281           | 0.96 (0.92,1.00) | 0.023                      |
| rs244322         | 53224759              | Imputed   | C/T                  | 0.29             | 0.99              | 0.98             | 2.03E-13                  | 0.93 (0.91,0.94) | 3.35E-13         | 0.91 (0.89,0.94) | 0.0281           | 0.96 (0.92,1.00) | 0.021                      |
| rs2628315        | 53226622              | Genotyped | G/A                  | 0.29             | 1                 | 0.99             | 9.02E-14                  | 0.92 (0.90,0.94) | 1.78E-13         | 0.91 (0.89,0.93) | 0.0259           | 0.96 (0.92,0.99) | 0.018                      |

|          |          |         |     |      |      |      |          |                  |          |                  |        |                  |       |
|----------|----------|---------|-----|------|------|------|----------|------------------|----------|------------------|--------|------------------|-------|
| rs244294 | 53228543 | Imputed | A/G | 0.29 | 0.99 | 0.98 | 9.28E-13 | 0.93 (0.91,0.95) | 1.21E-12 | 0.91 (0.89,0.94) | 0.0354 | 0.96 (0.92,1.00) | 0.022 |
|----------|----------|---------|-----|------|------|------|----------|------------------|----------|------------------|--------|------------------|-------|

---

a: Build 37 coordinates on chromosome 17.

b: Major and minor allele.

c: Minor Allele Frequency

d: IMPUTE2 info score.

e: Correlation with respect to lead SNP rs2787486.

f: P-value, Odds ratio (OR) and 95% Confidence Interval (CI) for association with Overall Breast Cancer Risk, Estrogen Positive (ER+) and Estrogen Negative (ER-) disease.

g: Case-only analysis, treating subtype status as a dependent variable, models adjusted for principal components and per-study fixed-effects.

---

**Supplementary Table 3: Based on data from all Asian studies, association results for genotyped markers with MAF≥0.01 ranked by Overall Risk association.**

| SNP        | Position <sup>a</sup> | Maj/Min <sup>b</sup> | MAF <sup>c</sup> | Overall Risk <sup>d</sup> |                  | ER+ <sup>d</sup> |                  | ER- <sup>d</sup> |                  | Heterogeneity <sup>e</sup> |
|------------|-----------------------|----------------------|------------------|---------------------------|------------------|------------------|------------------|------------------|------------------|----------------------------|
|            |                       |                      |                  | P-value                   | OR (95% CI)      | P-value          | OR (95% CI)      | P-value          | OR (95% CI)      | P-value                    |
| rs244353   | 53194769              | G/A                  | 0.28             | 0.00257                   | 0.92 (0.87,0.97) | 0.00506          | 0.91 (0.85,0.97) | 0.0443           | 0.91 (0.83,1)    | 0.765                      |
| rs244338   | 53200418              | G/A                  | 0.28             | 0.00278                   | 0.92 (0.87,0.97) | 0.00581          | 0.91 (0.85,0.97) | 0.041            | 0.91 (0.83,1)    | 0.798                      |
| rs2628321  | 53205917              | A/G                  | 0.28             | 0.00281                   | 0.92 (0.87,0.97) | 0.0054           | 0.91 (0.85,0.97) | 0.0447           | 0.91 (0.83,1)    | 0.775                      |
| rs244342   | 53198407              | G/A                  | 0.28             | 0.003                     | 0.92 (0.87,0.97) | 0.00642          | 0.91 (0.85,0.97) | 0.0393           | 0.91 (0.83,1)    | 0.849                      |
| rs12449538 | 53111121              | G/A                  | 0.28             | 0.0041                    | 0.92 (0.87,0.97) | 0.0053           | 0.91 (0.85,0.97) | 0.0582           | 0.92 (0.84,1)    | 0.698                      |
| rs2787500  | 53169806              | A/C                  | 0.29             | 0.00543                   | 0.92 (0.87,0.98) | 0.00683          | 0.91 (0.85,0.97) | 0.0541           | 0.92 (0.84,1)    | 0.813                      |
| rs2628315  | 53226622              | G/A                  | 0.29             | 0.00594                   | 0.92 (0.87,0.98) | 0.00655          | 0.91 (0.85,0.97) | 0.0778           | 0.92 (0.84,1.01) | 0.715                      |
| rs7211784  | 53279433              | A/G                  | 0.44             | 0.012                     | 0.94 (0.89,0.99) | 0.000987         | 0.9 (0.85,0.96)  | 0.00978          | 0.9 (0.83,0.97)  | 0.868                      |
| rs2628316  | 53219837              | A/G                  | 0.28             | 0.0151                    | 0.93 (0.88,0.99) | 0.0115           | 0.91 (0.85,0.98) | 0.19             | 0.94 (0.86,1.03) | 0.501                      |
| rs2958905  | 52863768              | A/G                  | 0.19             | 0.0152                    | 0.92 (0.86,0.98) | 0.0484           | 0.92 (0.85,1)    | 0.17             | 0.93 (0.83,1.03) | 0.867                      |
| rs11650051 | 52944139              | G/A                  | 0.13             | 0.0167                    | 1.1 (1.02,1.18)  | 0.311            | 1.05 (0.96,1.15) | 0.0161           | 1.16 (1.03,1.3)  | 0.0911                     |
| rs2628314  | 53235182              | A/G                  | 0.44             | 0.0175                    | 0.94 (0.89,0.99) | 0.00107          | 0.9 (0.85,0.96)  | 0.245            | 0.95 (0.88,1.03) | 0.123                      |
| rs7503456  | 53280553              | G/A                  | 0.49             | 0.0198                    | 0.94 (0.89,0.99) | 0.000273         | 0.89 (0.84,0.95) | 0.035            | 0.92 (0.85,0.99) | 0.428                      |
| rs244298   | 53241387              | G/A                  | 0.44             | 0.0201                    | 0.94 (0.89,0.99) | 0.00111          | 0.9 (0.85,0.96)  | 0.285            | 0.96 (0.88,1.04) | 0.101                      |
| rs244303   | 53238728              | G/A                  | 0.44             | 0.0202                    | 0.94 (0.89,0.99) | 0.00124          | 0.9 (0.85,0.96)  | 0.278            | 0.96 (0.88,1.04) | 0.114                      |
| rs10432032 | 53224088              | A/G                  | 0.3              | 0.0203                    | 0.94 (0.88,0.99) | 0.0197           | 0.92 (0.86,0.99) | 0.202            | 0.94 (0.86,1.03) | 0.565                      |
| rs244300   | 53239240              | T/A                  | 0.44             | 0.0213                    | 0.94 (0.9,0.99)  | 0.00126          | 0.9 (0.85,0.96)  | 0.288            | 0.96 (0.88,1.04) | 0.109                      |
| rs244291   | 53231137              | G/A                  | 0.44             | 0.0222                    | 0.94 (0.9,0.99)  | 0.00111          | 0.9 (0.85,0.96)  | 0.314            | 0.96 (0.89,1.04) | 0.0895                     |
| rs244293   | 53230722              | A/G                  | 0.44             | 0.0225                    | 0.94 (0.9,0.99)  | 0.00105          | 0.9 (0.85,0.96)  | 0.284            | 0.96 (0.88,1.04) | 0.0993                     |
| rs244299   | 53240266              | C/A                  | 0.44             | 0.0225                    | 0.94 (0.9,0.99)  | 0.00124          | 0.9 (0.85,0.96)  | 0.289            | 0.96 (0.88,1.04) | 0.106                      |
| rs244320   | 53222920              | G/A                  | 0.3              | 0.0233                    | 0.94 (0.89,0.99) | 0.0194           | 0.92 (0.86,0.99) | 0.312            | 0.96 (0.88,1.04) | 0.424                      |
| rs244319   | 53222874              | G/A                  | 0.3              | 0.0263                    | 0.94 (0.89,0.99) | 0.022            | 0.92 (0.86,0.99) | 0.309            | 0.96 (0.88,1.04) | 0.452                      |
| rs2541235  | 53157394              | G/A                  | 0.41             | 0.0303                    | 1.06 (1.01,1.11) | 0.278            | 1.04 (0.97,1.1)  | 0.00705          | 1.12 (1.03,1.21) | 0.136                      |
| rs244301   | 53239140              | G/A                  | 0.46             | 0.032                     | 0.95 (0.9,1)     | 0.00177          | 0.91 (0.85,0.96) | 0.518            | 0.97 (0.9,1.05)  | 0.0602                     |
| rs11079139 | 52960751              | A/G                  | 0.15             | 0.0341                    | 0.93 (0.86,0.99) | 0.192            | 0.94 (0.87,1.03) | 0.426            | 0.96 (0.86,1.07) | 0.683                      |
| rs12449786 | 53085570              | C/A                  | 0.42             | 0.0379                    | 1.06 (1,1.11)    | 0.311            | 1.03 (0.97,1.1)  | 0.00973          | 1.11 (1.03,1.21) | 0.168                      |
| rs7215402  | 52963855              | A/G                  | 0.1              | 0.0434                    | 0.91 (0.84,1)    | 0.0796           | 0.91 (0.82,1.01) | 0.513            | 0.96 (0.84,1.09) | 0.393                      |

|                  |          |     |      |        |                  |         |                  |        |                  |        |
|------------------|----------|-----|------|--------|------------------|---------|------------------|--------|------------------|--------|
| rs7207239        | 52942456 | G/A | 0.15 | 0.044  | 1.08 (1,1.15)    | 0.448   | 1.03 (0.95,1.13) | 0.0996 | 1.1 (0.98,1.23)  | 0.229  |
| rs7225949        | 53096771 | G/A | 0.45 | 0.0445 | 0.95 (0.9,1)     | 0.00299 | 0.91 (0.86,0.97) | 0.345  | 0.96 (0.89,1.04) | 0.128  |
| rs244288         | 53231841 | G/A | 0.46 | 0.0455 | 0.95 (0.9,1)     | 0.00393 | 0.91 (0.86,0.97) | 0.567  | 0.98 (0.9,1.06)  | 0.0776 |
| rs244297         | 53241700 | A/G | 0.46 | 0.0456 | 0.95 (0.9,1)     | 0.00279 | 0.91 (0.86,0.97) | 0.6    | 0.98 (0.9,1.06)  | 0.061  |
| rs7207731        | 52942722 | G/A | 0.15 | 0.0458 | 1.07 (1,1.15)    | 0.458   | 1.03 (0.95,1.13) | 0.102  | 1.1 (0.98,1.23)  | 0.229  |
| rs17817442       | 53099514 | A/G | 0.45 | 0.0473 | 0.95 (0.9,1)     | 0.00273 | 0.91 (0.86,0.97) | 0.374  | 0.96 (0.89,1.04) | 0.117  |
| rs244339         | 53200114 | G/A | 0.47 | 0.0476 | 0.95 (0.9,1)     | 0.00259 | 0.91 (0.86,0.97) | 0.581  | 0.98 (0.9,1.06)  | 0.0516 |
| rs2170943        | 53209505 | C/A | 0.47 | 0.0487 | 0.95 (0.9,1)     | 0.00308 | 0.91 (0.86,0.97) | 0.627  | 0.98 (0.9,1.06)  | 0.0554 |
| rs2529506        | 53211177 | G/A | 0.47 | 0.0511 | 0.95 (0.9,1)     | 0.00372 | 0.91 (0.86,0.97) | 0.512  | 0.97 (0.9,1.05)  | 0.0807 |
| rs244305         | 53237843 | A/G | 0.46 | 0.0541 | 0.95 (0.9,1)     | 0.00433 | 0.92 (0.86,0.97) | 0.595  | 0.98 (0.9,1.06)  | 0.0763 |
| rs244289         | 53231788 | A/G | 0.46 | 0.0544 | 0.95 (0.9,1)     | 0.00446 | 0.92 (0.86,0.97) | 0.593  | 0.98 (0.9,1.06)  | 0.0783 |
| rs244295         | 53242899 | T/A | 0.46 | 0.0548 | 0.95 (0.9,1)     | 0.00433 | 0.92 (0.86,0.97) | 0.626  | 0.98 (0.9,1.06)  | 0.0708 |
| rs244296         | 53242878 | A/G | 0.46 | 0.0548 | 0.95 (0.9,1)     | 0.00424 | 0.91 (0.86,0.97) | 0.632  | 0.98 (0.91,1.06) | 0.0689 |
| rs183618         | 53235974 | A/G | 0.46 | 0.0561 | 0.95 (0.91,1)    | 0.00463 | 0.92 (0.86,0.97) | 0.6    | 0.98 (0.9,1.06)  | 0.0783 |
| ch17_pos52942053 | 52942053 | A/G | 0.14 | 0.0581 | 1.07 (1,1.15)    | 0.432   | 1.04 (0.95,1.13) | 0.182  | 1.08 (0.96,1.21) | 0.364  |
| rs244308         | 53212053 | A/G | 0.46 | 0.0633 | 0.95 (0.91,1)    | 0.00409 | 0.91 (0.86,0.97) | 0.597  | 0.98 (0.9,1.06)  | 0.0661 |
| rs2628300        | 53160154 | G/A | 0.42 | 0.0652 | 1.05 (1,1.1)     | 0.44    | 1.02 (0.96,1.09) | 0.0119 | 1.11 (1.02,1.21) | 0.139  |
| rs244292         | 53230734 | A/G | 0.46 | 0.0677 | 0.95 (0.91,1)    | 0.0048  | 0.92 (0.86,0.97) | 0.646  | 0.98 (0.91,1.06) | 0.0701 |
| rs244309         | 53212093 | C/G | 0.47 | 0.0682 | 0.95 (0.91,1)    | 0.00462 | 0.92 (0.86,0.97) | 0.603  | 0.98 (0.9,1.06)  | 0.0698 |
| rs244313         | 53214332 | G/A | 0.46 | 0.0704 | 0.95 (0.91,1)    | 0.00485 | 0.92 (0.86,0.97) | 0.613  | 0.98 (0.9,1.06)  | 0.069  |
| rs9891263        | 52937108 | G/A | 0.38 | 0.0711 | 1.05 (1,1.1)     | 0.197   | 1.04 (0.98,1.11) | 0.53   | 1.03 (0.95,1.12) | 0.711  |
| rs12941961       | 52958586 | G/A | 0.09 | 0.0715 | 0.92 (0.85,1.01) | 0.119   | 0.92 (0.83,1.02) | 0.524  | 0.96 (0.84,1.09) | 0.475  |
| rs244311         | 53212803 | G/A | 0.47 | 0.0773 | 0.96 (0.91,1)    | 0.00595 | 0.92 (0.86,0.98) | 0.604  | 0.98 (0.9,1.06)  | 0.0799 |
| rs171510         | 53211527 | G/A | 0.47 | 0.0777 | 0.96 (0.91,1.01) | 0.00576 | 0.92 (0.86,0.98) | 0.598  | 0.98 (0.9,1.06)  | 0.0798 |
| rs2787482        | 53210774 | G/A | 0.47 | 0.0805 | 0.96 (0.91,1.01) | 0.00618 | 0.92 (0.86,0.98) | 0.6    | 0.98 (0.9,1.06)  | 0.0823 |
| rs244290         | 53231231 | A/G | 0.46 | 0.0814 | 0.96 (0.91,1.01) | 0.00628 | 0.92 (0.86,0.98) | 0.686  | 0.98 (0.91,1.07) | 0.0714 |
| rs244312         | 53213197 | A/G | 0.47 | 0.082  | 0.96 (0.91,1.01) | 0.00652 | 0.92 (0.86,0.98) | 0.597  | 0.98 (0.9,1.06)  | 0.0866 |
| rs2628318        | 53210312 | A/G | 0.47 | 0.0845 | 0.96 (0.91,1.01) | 0.00685 | 0.92 (0.87,0.98) | 0.6    | 0.98 (0.9,1.06)  | 0.0869 |
| rs2787488        | 53208151 | A/G | 0.47 | 0.0867 | 0.96 (0.91,1.01) | 0.00644 | 0.92 (0.86,0.98) | 0.677  | 0.98 (0.91,1.06) | 0.0677 |
| rs17746183       | 52966587 | G/A | 0.03 | 0.0927 | 1.14 (0.98,1.32) | 0.056   | 1.19 (1,1.42)    | 0.902  | 0.99 (0.78,1.25) | 0.148  |

|            |          |     |      |        |                  |         |                  |        |                  |        |
|------------|----------|-----|------|--------|------------------|---------|------------------|--------|------------------|--------|
| rs244341   | 53198922 | G/A | 0.47 | 0.0938 | 0.96 (0.91,1.01) | 0.00808 | 0.92 (0.87,0.98) | 0.661  | 0.98 (0.91,1.06) | 0.0766 |
| rs2058026  | 53204759 | T/A | 0.47 | 0.0954 | 0.96 (0.91,1.01) | 0.00762 | 0.92 (0.87,0.98) | 0.645  | 0.98 (0.91,1.06) | 0.0768 |
| rs244316   | 53215223 | G/A | 0.47 | 0.0958 | 0.96 (0.91,1.01) | 0.00644 | 0.92 (0.86,0.98) | 0.727  | 0.99 (0.91,1.07) | 0.0607 |
| rs244350   | 53196132 | G/C | 0.47 | 0.0979 | 0.96 (0.91,1.01) | 0.00808 | 0.92 (0.87,0.98) | 0.64   | 0.98 (0.91,1.06) | 0.0802 |
| rs244356   | 53193809 | C/A | 0.47 | 0.0982 | 0.96 (0.91,1.01) | 0.0079  | 0.92 (0.87,0.98) | 0.676  | 0.98 (0.91,1.06) | 0.0731 |
| rs2787484  | 53210120 | G/A | 0.47 | 0.0982 | 0.96 (0.91,1.01) | 0.00751 | 0.92 (0.87,0.98) | 0.705  | 0.98 (0.91,1.07) | 0.069  |
| rs244334   | 53204055 | A/G | 0.47 | 0.0983 | 0.96 (0.91,1.01) | 0.00762 | 0.92 (0.87,0.98) | 0.667  | 0.98 (0.91,1.06) | 0.0731 |
| rs1994234  | 53229345 | A/G | 0.47 | 0.0983 | 0.96 (0.91,1.01) | 0.00709 | 0.92 (0.87,0.98) | 0.705  | 0.98 (0.91,1.07) | 0.0701 |
| rs8079105  | 52966403 | G/A | 0.22 | 0.0986 | 0.95 (0.89,1.01) | 0.161   | 0.95 (0.88,1.02) | 0.192  | 0.94 (0.85,1.03) | 0.964  |
| rs7212184  | 52942558 | A/G | 0.19 | 0.0995 | 1.06 (0.99,1.12) | 0.269   | 1.05 (0.97,1.13) | 0.223  | 1.06 (0.96,1.18) | 0.559  |
| rs17683089 | 52943044 | C/G | 0.19 | 0.1    | 1.05 (0.99,1.12) | 0.261   | 1.05 (0.97,1.13) | 0.236  | 1.06 (0.96,1.18) | 0.589  |
| rs244355   | 53194085 | T/A | 0.47 | 0.1    | 0.96 (0.91,1.01) | 0.00845 | 0.92 (0.87,0.98) | 0.66   | 0.98 (0.91,1.06) | 0.0769 |
| rs2628323  | 53203097 | A/T | 0.47 | 0.1    | 0.96 (0.91,1.01) | 0.00801 | 0.92 (0.87,0.98) | 0.667  | 0.98 (0.91,1.06) | 0.0751 |
| rs244307   | 53211713 | A/G | 0.47 | 0.101  | 0.96 (0.91,1.01) | 0.00651 | 0.92 (0.86,0.98) | 0.743  | 0.99 (0.91,1.07) | 0.0576 |
| rs244360   | 53191703 | A/G | 0.47 | 0.103  | 0.96 (0.91,1.01) | 0.00805 | 0.92 (0.87,0.98) | 0.693  | 0.98 (0.91,1.07) | 0.0719 |
| rs244335   | 53201930 | C/G | 0.47 | 0.104  | 0.96 (0.91,1.01) | 0.00867 | 0.92 (0.87,0.98) | 0.667  | 0.98 (0.91,1.06) | 0.0777 |
| rs244351   | 53195566 | G/A | 0.47 | 0.106  | 0.96 (0.91,1.01) | 0.00923 | 0.92 (0.87,0.98) | 0.679  | 0.98 (0.91,1.06) | 0.0774 |
| rs244368   | 53186537 | G/A | 0.47 | 0.107  | 0.96 (0.91,1.01) | 0.00818 | 0.92 (0.87,0.98) | 0.7    | 0.98 (0.91,1.07) | 0.0737 |
| rs2628302  | 53158361 | G/A | 0.39 | 0.11   | 1.04 (0.99,1.1)  | 0.556   | 1.02 (0.96,1.09) | 0.0272 | 1.1 (1.01,1.19)  | 0.143  |
| rs2958902  | 52866817 | G/A | 0.08 | 0.111  | 0.92 (0.84,1.02) | 0.0906  | 0.9 (0.8,1.02)   | 0.685  | 0.97 (0.83,1.13) | 0.502  |
| rs244343   | 53197612 | A/G | 0.47 | 0.112  | 0.96 (0.91,1.01) | 0.00974 | 0.92 (0.87,0.98) | 0.68   | 0.98 (0.91,1.06) | 0.0799 |
| rs244344   | 53196998 | A/G | 0.47 | 0.113  | 0.96 (0.91,1.01) | 0.0112  | 0.92 (0.87,0.98) | 0.668  | 0.98 (0.91,1.06) | 0.0897 |
| rs244340   | 53199345 | G/A | 0.47 | 0.114  | 0.96 (0.91,1.01) | 0.00919 | 0.92 (0.87,0.98) | 0.708  | 0.98 (0.91,1.07) | 0.0726 |
| rs244354   | 53194142 | G/A | 0.47 | 0.116  | 0.96 (0.91,1.01) | 0.0085  | 0.92 (0.87,0.98) | 0.785  | 0.99 (0.91,1.07) | 0.0569 |
| rs244352   | 53195478 | A/G | 0.47 | 0.117  | 0.96 (0.91,1.01) | 0.00862 | 0.92 (0.87,0.98) | 0.767  | 0.99 (0.91,1.07) | 0.0598 |
| rs244333   | 53204178 | G/A | 0.47 | 0.117  | 0.96 (0.91,1.01) | 0.00899 | 0.92 (0.87,0.98) | 0.772  | 0.99 (0.91,1.07) | 0.061  |
| rs12603955 | 52996688 | G/A | 0.11 | 0.119  | 0.94 (0.86,1.02) | 0.156   | 0.93 (0.84,1.03) | 0.483  | 0.95 (0.84,1.09) | 0.693  |
| rs8065212  | 53024240 | A/G | 0.46 | 0.119  | 0.96 (0.91,1.01) | 0.746   | 0.99 (0.93,1.05) | 0.134  | 0.94 (0.87,1.02) | 0.327  |
| rs8080876  | 53175267 | G/A | 0.46 | 0.12   | 0.96 (0.91,1.01) | 0.00923 | 0.92 (0.87,0.98) | 0.693  | 0.98 (0.91,1.07) | 0.0819 |
| rs244361   | 53191356 | A/G | 0.47 | 0.12   | 0.96 (0.91,1.01) | 0.00884 | 0.92 (0.87,0.98) | 0.791  | 0.99 (0.91,1.07) | 0.0583 |

|                  |          |     |      |       |                  |         |                  |        |                  |        |
|------------------|----------|-----|------|-------|------------------|---------|------------------|--------|------------------|--------|
| rs171513         | 53190426 | A/G | 0.47 | 0.121 | 0.96 (0.91,1.01) | 0.009   | 0.92 (0.87,0.98) | 0.811  | 0.99 (0.91,1.07) | 0.0558 |
| rs10515083       | 52964057 | T/A | 0.25 | 0.123 | 0.95 (0.9,1.01)  | 0.0784  | 0.94 (0.87,1.01) | 0.634  | 0.98 (0.89,1.07) | 0.408  |
| rs8072090        | 53174434 | T/A | 0.46 | 0.123 | 0.96 (0.91,1.01) | 0.00923 | 0.92 (0.87,0.98) | 0.665  | 0.98 (0.91,1.06) | 0.0975 |
| rs244345         | 53196977 | T/A | 0.47 | 0.124 | 0.96 (0.91,1.01) | 0.00955 | 0.92 (0.87,0.98) | 0.781  | 0.99 (0.91,1.07) | 0.0615 |
| rs2541241        | 53072993 | C/A | 0.47 | 0.126 | 0.96 (0.91,1.01) | 0.0102  | 0.92 (0.87,0.98) | 0.717  | 0.99 (0.91,1.07) | 0.0894 |
| rs244357         | 53193181 | A/G | 0.47 | 0.126 | 0.96 (0.91,1.01) | 0.00953 | 0.92 (0.87,0.98) | 0.784  | 0.99 (0.91,1.07) | 0.061  |
| rs2958898        | 52869248 | C/A | 0.25 | 0.127 | 1.05 (0.99,1.11) | 0.471   | 1.03 (0.96,1.1)  | 0.117  | 1.08 (0.98,1.18) | 0.192  |
| rs7224560        | 53176539 | G/C | 0.47 | 0.127 | 0.96 (0.91,1.01) | 0.0103  | 0.92 (0.87,0.98) | 0.721  | 0.99 (0.91,1.07) | 0.0781 |
| rs7209029        | 53173046 | G/A | 0.46 | 0.128 | 0.96 (0.91,1.01) | 0.00911 | 0.92 (0.87,0.98) | 0.711  | 0.99 (0.91,1.07) | 0.0856 |
| rs2628324        | 53202977 | A/T | 0.47 | 0.129 | 0.96 (0.91,1.01) | 0.00971 | 0.92 (0.87,0.98) | 0.804  | 0.99 (0.91,1.07) | 0.0597 |
| rs11655949       | 53169883 | G/A | 0.46 | 0.13  | 0.96 (0.91,1.01) | 0.00869 | 0.92 (0.87,0.98) | 0.731  | 0.99 (0.91,1.07) | 0.0828 |
| rs4794552        | 53087132 | T/A | 0.49 | 0.131 | 0.96 (0.91,1.01) | 0.856   | 0.99 (0.93,1.06) | 0.12   | 0.94 (0.86,1.02) | 0.22   |
| rs244363         | 53188893 | G/A | 0.47 | 0.133 | 0.96 (0.92,1.01) | 0.0103  | 0.92 (0.87,0.98) | 0.791  | 0.99 (0.91,1.07) | 0.0648 |
| rs2958925        | 52960715 | A/G | 0.33 | 0.136 | 1.04 (0.99,1.1)  | 0.243   | 1.04 (0.97,1.11) | 0.637  | 1.02 (0.94,1.11) | 0.847  |
| rs244364         | 53188280 | G/A | 0.47 | 0.136 | 0.96 (0.92,1.01) | 0.00989 | 0.92 (0.87,0.98) | 0.837  | 0.99 (0.92,1.07) | 0.0574 |
| rs2934892        | 52933304 | A/C | 0.14 | 0.137 | 1.06 (0.98,1.13) | 0.983   | 1 (0.91,1.09)    | 0.0849 | 1.1 (0.99,1.24)  | 0.093  |
| rs12150025       | 52932154 | T/A | 0.14 | 0.138 | 1.06 (0.98,1.13) | 0.994   | 1 (0.91,1.09)    | 0.0958 | 1.1 (0.98,1.23)  | 0.116  |
| rs9914596        | 52996551 | G/A | 0.11 | 0.14  | 1.06 (0.98,1.15) | 0.648   | 1.02 (0.93,1.13) | 0.619  | 1.03 (0.91,1.17) | 0.837  |
| rs9303359        | 52934629 | A/G | 0.26 | 0.14  | 1.04 (0.99,1.11) | 0.662   | 1.02 (0.95,1.09) | 0.0602 | 1.09 (1,1.19)    | 0.159  |
| rs2787504        | 53178341 | G/A | 0.46 | 0.14  | 0.96 (0.92,1.01) | 0.0114  | 0.92 (0.87,0.98) | 0.75   | 0.99 (0.91,1.07) | 0.077  |
| rs2332311        | 52957444 | A/G | 0.49 | 0.144 | 1.04 (0.99,1.09) | 0.424   | 1.03 (0.96,1.09) | 0.667  | 1.02 (0.94,1.1)  | 0.92   |
| ch17_pos52969673 | 52969673 | G/A | 0.14 | 0.145 | 0.95 (0.88,1.02) | 0.034   | 0.91 (0.83,0.99) | 0.435  | 1.05 (0.93,1.18) | 0.0209 |
| rs11079153       | 53176023 | G/C | 0.46 | 0.146 | 0.96 (0.92,1.01) | 0.0114  | 0.92 (0.87,0.98) | 0.773  | 0.99 (0.91,1.07) | 0.0737 |
| rs1948000        | 53147716 | C/A | 0.47 | 0.146 | 0.96 (0.92,1.01) | 0.0128  | 0.93 (0.87,0.98) | 0.701  | 0.98 (0.91,1.07) | 0.108  |
| rs2628326        | 53178283 | G/A | 0.47 | 0.148 | 0.96 (0.92,1.01) | 0.0115  | 0.92 (0.87,0.98) | 0.848  | 0.99 (0.92,1.07) | 0.0593 |
| rs12453615       | 53177509 | A/G | 0.47 | 0.15  | 0.96 (0.92,1.01) | 0.0113  | 0.92 (0.87,0.98) | 0.85   | 0.99 (0.92,1.07) | 0.0608 |
| rs8068337        | 53177899 | G/A | 0.47 | 0.151 | 0.96 (0.92,1.01) | 0.0119  | 0.93 (0.87,0.98) | 0.842  | 0.99 (0.92,1.07) | 0.0617 |
| rs7207057        | 53172968 | G/C | 0.47 | 0.157 | 0.96 (0.92,1.01) | 0.0119  | 0.93 (0.87,0.98) | 0.767  | 0.99 (0.91,1.07) | 0.0922 |
| rs8080157        | 53208450 | A/G | 0.24 | 0.158 | 1.04 (0.98,1.11) | 0.138   | 1.06 (0.98,1.13) | 0.257  | 1.06 (0.96,1.16) | 0.631  |
| rs12453779       | 53172109 | A/G | 0.46 | 0.158 | 0.96 (0.92,1.01) | 0.0112  | 0.92 (0.87,0.98) | 0.706  | 0.98 (0.91,1.07) | 0.102  |

|                  |          |     |      |       |                  |        |                  |        |                  |         |
|------------------|----------|-----|------|-------|------------------|--------|------------------|--------|------------------|---------|
| rs2934894        | 52940581 | A/C | 0.09 | 0.159 | 0.94 (0.86,1.03) | 0.0046 | 0.85 (0.76,0.95) | 0.5    | 1.05 (0.91,1.2)  | 0.00918 |
| rs9303362        | 53062553 | G/A | 0.47 | 0.165 | 0.96 (0.92,1.01) | 0.013  | 0.93 (0.87,0.98) | 0.797  | 0.99 (0.91,1.07) | 0.0859  |
| rs2907643        | 52886167 | A/G | 0.04 | 0.166 | 0.91 (0.79,1.04) | 0.281  | 0.91 (0.76,1.08) | 0.679  | 0.95 (0.77,1.19) | 0.66    |
| rs2934891        | 52933244 | A/C | 0.11 | 0.174 | 0.95 (0.87,1.03) | 0.0478 | 0.9 (0.82,1)     | 0.582  | 1.04 (0.91,1.17) | 0.042   |
| rs6504933        | 52828898 | A/G | 0.21 | 0.175 | 1.04 (0.98,1.11) | 0.446  | 1.03 (0.96,1.11) | 0.4    | 1.04 (0.95,1.15) | 0.904   |
| rs12450607       | 53127255 | C/G | 0.48 | 0.175 | 0.97 (0.92,1.02) | 0.024  | 0.93 (0.88,0.99) | 0.646  | 0.98 (0.91,1.06) | 0.176   |
| rs7218719        | 53245227 | A/G | 0.11 | 0.178 | 0.94 (0.87,1.03) | 0.0607 | 0.91 (0.82,1)    | 0.0793 | 0.89 (0.78,1.02) | 0.717   |
| rs2907631        | 52867544 | A/C | 0.26 | 0.178 | 1.04 (0.98,1.1)  | 0.489  | 1.02 (0.96,1.1)  | 0.212  | 1.06 (0.97,1.16) | 0.316   |
| rs1860457        | 52868303 | A/G | 0.26 | 0.18  | 1.04 (0.98,1.1)  | 0.537  | 1.02 (0.95,1.1)  | 0.185  | 1.06 (0.97,1.16) | 0.245   |
| rs12937006       | 53030461 | G/A | 0.11 | 0.181 | 1.06 (0.98,1.14) | 0.741  | 1.02 (0.92,1.12) | 0.825  | 1.01 (0.9,1.15)  | 0.927   |
| rs12453699       | 53171846 | A/C | 0.47 | 0.181 | 0.97 (0.92,1.02) | 0.013  | 0.93 (0.87,0.98) | 0.817  | 0.99 (0.91,1.07) | 0.0832  |
| rs10852971       | 53058738 | G/A | 0.24 | 0.184 | 1.04 (0.98,1.1)  | 0.17   | 1.05 (0.98,1.13) | 0.102  | 1.08 (0.98,1.19) | 0.888   |
| rs6504934        | 52830106 | G/A | 0.14 | 0.187 | 1.05 (0.98,1.14) | 0.306  | 1.05 (0.96,1.16) | 0.16   | 1.09 (0.97,1.24) | 0.566   |
| rs1106602        | 52916757 | C/G | 0.16 | 0.187 | 1.05 (0.98,1.12) | 0.364  | 1.04 (0.96,1.13) | 0.584  | 1.03 (0.93,1.15) | 0.818   |
| rs2958940        | 52950183 | A/G | 0.09 | 0.189 | 0.94 (0.86,1.03) | 0.011  | 0.87 (0.78,0.97) | 0.579  | 1.04 (0.91,1.19) | 0.017   |
| rs2958908        | 52846363 | A/G | 0.05 | 0.198 | 0.92 (0.82,1.04) | 0.178  | 0.9 (0.78,1.05)  | 0.941  | 0.99 (0.82,1.2)  | 0.427   |
| rs6504942        | 52958987 | G/C | 0.45 | 0.199 | 0.97 (0.92,1.02) | 0.28   | 0.97 (0.91,1.03) | 0.813  | 0.99 (0.91,1.07) | 0.65    |
| rs8072453        | 52956033 | G/C | 0.17 | 0.2   | 0.96 (0.89,1.02) | 0.135  | 0.94 (0.86,1.02) | 0.441  | 0.96 (0.86,1.07) | 0.835   |
| rs7221313        | 52957823 | T/A | 0.43 | 0.205 | 0.97 (0.92,1.02) | 0.188  | 0.96 (0.9,1.02)  | 0.799  | 1.01 (0.93,1.1)  | 0.299   |
| rs7225247        | 52933176 | G/A | 0.39 | 0.208 | 1.03 (0.98,1.09) | 0.535  | 1.02 (0.96,1.09) | 0.528  | 1.03 (0.95,1.11) | 0.916   |
| rs974588         | 52864264 | C/A | 0.01 | 0.21  | 0.86 (0.67,1.09) | 0.396  | 0.88 (0.64,1.19) | 0.345  | 0.84 (0.57,1.22) | 0.703   |
| rs2934928        | 52956487 | A/G | 0.33 | 0.212 | 1.03 (0.98,1.09) | 0.793  | 1.01 (0.94,1.08) | 0.706  | 1.02 (0.93,1.11) | 0.832   |
| rs12945137       | 53065846 | G/A | 0.24 | 0.213 | 1.04 (0.98,1.1)  | 0.197  | 1.05 (0.98,1.13) | 0.107  | 1.08 (0.98,1.19) | 0.871   |
| ch17_pos52846490 | 52846490 | G/A | 0.05 | 0.224 | 0.93 (0.82,1.05) | 0.172  | 0.9 (0.77,1.05)  | 0.959  | 1 (0.83,1.21)    | 0.337   |
| rs11079135       | 52919409 | A/G | 0.03 | 0.237 | 0.91 (0.79,1.06) | 0.506  | 0.94 (0.78,1.13) | 0.544  | 0.93 (0.73,1.18) | 0.96    |
| rs1106601        | 52916671 | G/C | 0.16 | 0.238 | 1.04 (0.97,1.12) | 0.393  | 1.04 (0.95,1.13) | 0.736  | 1.02 (0.91,1.13) | 0.997   |
| rs2934929        | 52913199 | T/A | 0.16 | 0.238 | 1.04 (0.97,1.12) | 0.365  | 1.04 (0.96,1.13) | 0.822  | 1.01 (0.91,1.13) | 0.963   |
| rs2332308        | 52944373 | A/G | 0.34 | 0.242 | 1.03 (0.98,1.09) | 0.745  | 0.99 (0.93,1.06) | 0.0816 | 1.08 (0.99,1.17) | 0.0639  |
| rs7211787        | 53234912 | T/A | 0.1  | 0.244 | 0.95 (0.87,1.04) | 0.0579 | 0.9 (0.81,1)     | 0.124  | 0.9 (0.79,1.03)  | 0.988   |
| rs11657590       | 52864887 | G/A | 0.27 | 0.245 | 1.03 (0.98,1.09) | 0.514  | 1.02 (0.95,1.1)  | 0.262  | 1.05 (0.96,1.15) | 0.323   |

|            |          |     |      |       |                  |        |                  |        |                  |         |
|------------|----------|-----|------|-------|------------------|--------|------------------|--------|------------------|---------|
| rs12951542 | 53041965 | A/G | 0.11 | 0.248 | 1.05 (0.97,1.13) | 0.868  | 1.01 (0.92,1.11) | 0.997  | 1 (0.88,1.13)    | 0.984   |
| rs2958919  | 52969601 | A/G | 0.22 | 0.25  | 1.04 (0.98,1.1)  | 0.792  | 1.01 (0.94,1.09) | 0.317  | 1.05 (0.96,1.15) | 0.313   |
| rs12938118 | 53037359 | A/G | 0.11 | 0.251 | 1.05 (0.97,1.13) | 0.867  | 1.01 (0.92,1.11) | 0.997  | 1 (0.88,1.13)    | 0.984   |
| rs17745231 | 53036529 | C/G | 0.11 | 0.251 | 1.05 (0.97,1.13) | 0.867  | 1.01 (0.92,1.11) | 0.997  | 1 (0.88,1.13)    | 0.984   |
| rs1802212  | 53038654 | A/C | 0.11 | 0.251 | 1.05 (0.97,1.13) | 0.867  | 1.01 (0.92,1.11) | 0.997  | 1 (0.88,1.13)    | 0.984   |
| rs9898886  | 53249679 | A/G | 0.09 | 0.254 | 0.95 (0.87,1.04) | 0.0723 | 0.91 (0.81,1.01) | 0.134  | 0.9 (0.78,1.03)  | 0.893   |
| rs2332314  | 53033007 | A/C | 0.24 | 0.261 | 1.04 (0.97,1.1)  | 0.748  | 0.99 (0.92,1.06) | 0.963  | 1 (0.91,1.1)     | 0.567   |
| rs17745049 | 52935126 | G/A | 0.04 | 0.263 | 0.93 (0.82,1.06) | 0.882  | 0.99 (0.85,1.15) | 0.399  | 0.92 (0.75,1.12) | 0.59    |
| rs3087650  | 53029328 | G/A | 0.11 | 0.266 | 1.05 (0.97,1.13) | 0.881  | 1.01 (0.91,1.11) | 0.96   | 1 (0.88,1.13)    | 0.984   |
| rs12150038 | 53041520 | A/C | 0.11 | 0.266 | 1.05 (0.97,1.13) | 0.91   | 1.01 (0.91,1.11) | 0.997  | 1 (0.88,1.13)    | 0.951   |
| rs12936639 | 53235982 | G/A | 0.1  | 0.27  | 0.95 (0.87,1.04) | 0.0619 | 0.9 (0.81,1.01)  | 0.137  | 0.9 (0.79,1.03)  | 0.967   |
| rs8066588  | 53025689 | G/A | 0.11 | 0.27  | 1.05 (0.97,1.13) | 0.928  | 1 (0.91,1.11)    | 0.988  | 1 (0.88,1.13)    | 0.914   |
| rs12936860 | 53030226 | G/A | 0.11 | 0.275 | 1.04 (0.97,1.13) | 0.933  | 1 (0.91,1.11)    | 0.994  | 1 (0.88,1.13)    | 0.932   |
| rs8072720  | 52955672 | A/T | 0.43 | 0.278 | 0.97 (0.92,1.02) | 0.309  | 0.97 (0.91,1.03) | 0.268  | 0.96 (0.88,1.04) | 0.99    |
| rs2907636  | 52879449 | A/G | 0.16 | 0.28  | 1.04 (0.97,1.11) | 0.348  | 1.04 (0.96,1.13) | 0.674  | 1.02 (0.92,1.14) | 0.892   |
| rs2907641  | 52883339 | G/A | 0.15 | 0.283 | 1.04 (0.97,1.11) | 0.405  | 1.04 (0.95,1.13) | 0.646  | 1.03 (0.92,1.14) | 0.802   |
| rs16955216 | 52929254 | A/C | 0.48 | 0.298 | 1.03 (0.98,1.08) | 0.889  | 1 (0.94,1.06)    | 0.182  | 1.06 (0.97,1.14) | 0.169   |
| rs12937760 | 53016130 | C/A | 0.12 | 0.317 | 1.04 (0.96,1.12) | 0.933  | 1 (0.91,1.09)    | 0.847  | 1.01 (0.9,1.14)  | 0.731   |
| rs2332265  | 52830795 | T/A | 0.35 | 0.318 | 1.03 (0.97,1.08) | 0.686  | 1.01 (0.95,1.08) | 0.194  | 1.06 (0.97,1.15) | 0.395   |
| rs7226272  | 53046447 | A/G | 0.43 | 0.319 | 1.03 (0.98,1.08) | 0.881  | 1 (0.94,1.07)    | 0.0815 | 1.08 (0.99,1.17) | 0.21    |
| rs12951898 | 53035602 | G/A | 0.23 | 0.323 | 1.03 (0.97,1.1)  | 0.648  | 0.98 (0.91,1.06) | 0.901  | 0.99 (0.9,1.1)   | 0.593   |
| rs4793783  | 53025480 | A/G | 0.23 | 0.329 | 1.03 (0.97,1.1)  | 0.596  | 0.98 (0.91,1.06) | 0.901  | 0.99 (0.9,1.1)   | 0.546   |
| rs12944690 | 53029614 | A/G | 0.23 | 0.334 | 1.03 (0.97,1.1)  | 0.638  | 0.98 (0.91,1.06) | 0.891  | 0.99 (0.9,1.09)  | 0.591   |
| rs12165058 | 53022049 | A/G | 0.23 | 0.335 | 1.03 (0.97,1.09) | 0.586  | 0.98 (0.91,1.06) | 0.898  | 0.99 (0.9,1.09)  | 0.541   |
| rs7224432  | 53176480 | C/A | 0.24 | 0.337 | 1.03 (0.97,1.09) | 0.272  | 1.04 (0.97,1.12) | 0.278  | 1.05 (0.96,1.16) | 0.794   |
| rs7208403  | 53046667 | A/C | 0.43 | 0.346 | 1.02 (0.97,1.08) | 0.931  | 1 (0.94,1.07)    | 0.0857 | 1.07 (0.99,1.17) | 0.201   |
| rs12946841 | 52971277 | C/A | 0.08 | 0.354 | 1.05 (0.95,1.15) | 0.852  | 1.01 (0.9,1.13)  | 0.871  | 0.99 (0.85,1.15) | 0.934   |
| rs2934890  | 52931473 | G/A | 0.07 | 0.356 | 0.95 (0.86,1.05) | 0.0469 | 0.88 (0.78,1)    | 0.522  | 1.05 (0.9,1.23)  | 0.0301  |
| rs6504947  | 53004144 | A/T | 0.41 | 0.36  | 0.98 (0.93,1.03) | 0.0571 | 0.94 (0.88,1)    | 0.753  | 0.99 (0.91,1.07) | 0.173   |
| rs1008523  | 53263614 | C/G | 0.3  | 0.367 | 1.03 (0.97,1.08) | 0.024  | 1.08 (1.01,1.15) | 0.272  | 0.95 (0.87,1.04) | 0.00859 |



|                  |          |     |      |       |                  |        |                  |        |                  |         |
|------------------|----------|-----|------|-------|------------------|--------|------------------|--------|------------------|---------|
| rs12952166       | 53005586 | G/A | 0.41 | 0.369 | 0.98 (0.93,1.03) | 0.0634 | 0.94 (0.89,1)    | 0.696  | 0.98 (0.91,1.07) | 0.203   |
| rs2529527        | 53186402 | A/G | 0.16 | 0.376 | 1.03 (0.96,1.11) | 0.438  | 0.97 (0.89,1.05) | 0.203  | 1.07 (0.96,1.2)  | 0.0392  |
| rs2628298        | 53163478 | T/A | 0.1  | 0.378 | 0.96 (0.88,1.05) | 0.138  | 0.92 (0.83,1.03) | 0.127  | 0.9 (0.78,1.03)  | 0.885   |
| rs7212321        | 53258437 | C/G | 0.1  | 0.378 | 0.96 (0.89,1.05) | 0.1    | 0.92 (0.83,1.02) | 0.161  | 0.91 (0.8,1.04)  | 0.809   |
| ch17_pos53018824 | 53018824 | G/A | 0.41 | 0.379 | 0.98 (0.93,1.03) | 0.0533 | 0.94 (0.88,1)    | 0.712  | 0.98 (0.91,1.07) | 0.176   |
| rs12937360       | 53046298 | A/G | 0.42 | 0.379 | 1.02 (0.97,1.08) | 0.959  | 1 (0.94,1.07)    | 0.117  | 1.07 (0.98,1.16) | 0.233   |
| rs7214573        | 53006654 | A/G | 0.12 | 0.38  | 1.04 (0.96,1.12) | 0.902  | 0.99 (0.9,1.09)  | 0.923  | 0.99 (0.88,1.12) | 0.902   |
| rs244329         | 53267230 | A/G | 0.3  | 0.38  | 1.02 (0.97,1.08) | 0.0221 | 1.08 (1.01,1.15) | 0.251  | 0.95 (0.87,1.04) | 0.00696 |
| rs2934884        | 52918902 | A/G | 0.28 | 0.381 | 1.03 (0.97,1.08) | 0.163  | 0.95 (0.89,1.02) | 0.0316 | 1.1 (1.01,1.2)   | 0.00277 |
| rs17745189       | 53013980 | A/G | 0.12 | 0.394 | 1.03 (0.96,1.12) | 0.937  | 1 (0.91,1.1)     | 0.873  | 0.99 (0.88,1.12) | 0.972   |
| rs8066213        | 52930323 | A/C | 0.47 | 0.396 | 1.02 (0.97,1.08) | 0.717  | 0.99 (0.93,1.05) | 0.234  | 1.05 (0.97,1.14) | 0.171   |
| rs1601297        | 53253019 | A/G | 0.3  | 0.398 | 1.02 (0.97,1.08) | 0.025  | 1.08 (1.01,1.15) | 0.247  | 0.95 (0.87,1.04) | 0.00782 |
| rs12949538       | 53010670 | G/A | 0.12 | 0.399 | 1.03 (0.96,1.12) | 0.838  | 0.99 (0.9,1.09)  | 0.937  | 1 (0.88,1.12)    | 0.841   |
| rs2958900        | 52868658 | A/G | 0.18 | 0.413 | 1.03 (0.96,1.1)  | 0.704  | 1.02 (0.94,1.1)  | 0.441  | 1.04 (0.94,1.15) | 0.372   |
| rs7218098        | 52834303 | A/G | 0.21 | 0.415 | 1.03 (0.96,1.09) | 0.689  | 1.02 (0.94,1.1)  | 0.317  | 1.05 (0.95,1.16) | 0.645   |
| rs2643023        | 53052002 | G/A | 0.33 | 0.417 | 1.02 (0.97,1.08) | 0.563  | 1.02 (0.95,1.09) | 0.63   | 1.02 (0.94,1.11) | 0.86    |
| rs2332303        | 52969844 | A/G | 0.47 | 0.417 | 1.02 (0.97,1.07) | 0.125  | 1.05 (0.99,1.11) | 0.96   | 1 (0.92,1.08)    | 0.154   |
| rs11869357       | 53193721 | A/G | 0.17 | 0.428 | 1.03 (0.96,1.1)  | 0.42   | 0.97 (0.89,1.05) | 0.269  | 1.06 (0.95,1.18) | 0.0613  |
| rs11079129       | 52869546 | G/A | 0.36 | 0.429 | 1.02 (0.97,1.08) | 0.894  | 1 (0.93,1.06)    | 0.106  | 1.07 (0.99,1.16) | 0.0552  |
| ch17_pos52831447 | 52831447 | G/A | 0.01 | 0.433 | 1.14 (0.82,1.58) | 0.354  | 0.81 (0.53,1.26) | 0.0038 | 1.91 (1.25,2.92) | 0.00692 |
| rs17675596       | 52872714 | G/C | 0.11 | 0.433 | 0.97 (0.89,1.05) | 0.981  | 1 (0.9,1.1)      | 0.0862 | 0.89 (0.78,1.02) | 0.0737  |
| rs9915913        | 52998168 | C/A | 0.12 | 0.435 | 1.03 (0.95,1.11) | 0.729  | 0.98 (0.89,1.08) | 0.924  | 0.99 (0.88,1.12) | 0.761   |
| rs9904768        | 53270820 | A/C | 0.24 | 0.436 | 1.02 (0.97,1.09) | 0.459  | 1.03 (0.96,1.1)  | 0.129  | 1.08 (0.98,1.18) | 0.528   |
| rs17745534       | 53137506 | G/A | 0.09 | 0.437 | 0.97 (0.88,1.05) | 0.2    | 0.93 (0.84,1.04) | 0.113  | 0.89 (0.78,1.03) | 0.819   |
| ch17_pos53017747 | 53017747 | A/G | 0.12 | 0.439 | 1.03 (0.95,1.11) | 0.967  | 1 (0.91,1.1)     | 0.913  | 0.99 (0.88,1.12) | 0.936   |
| rs2628310        | 53255472 | A/G | 0.3  | 0.446 | 1.02 (0.97,1.08) | 0.0301 | 1.08 (1.01,1.15) | 0.231  | 0.95 (0.87,1.04) | 0.00827 |
| rs11079143       | 53083122 | G/A | 0.09 | 0.447 | 0.97 (0.89,1.06) | 0.202  | 0.93 (0.84,1.04) | 0.125  | 0.9 (0.78,1.03)  | 0.857   |
| rs9303363        | 53137974 | G/A | 0.09 | 0.451 | 0.97 (0.89,1.06) | 0.206  | 0.93 (0.84,1.04) | 0.115  | 0.89 (0.78,1.03) | 0.819   |
| rs2787505        | 53107432 | G/A | 0.09 | 0.452 | 0.97 (0.89,1.06) | 0.202  | 0.93 (0.84,1.04) | 0.117  | 0.89 (0.78,1.03) | 0.827   |
| rs244328         | 53268945 | G/A | 0.3  | 0.453 | 1.02 (0.97,1.08) | 0.0318 | 1.07 (1.01,1.15) | 0.238  | 0.95 (0.87,1.04) | 0.00829 |

|                  |          |     |      |       |                  |        |                  |        |                  |        |
|------------------|----------|-----|------|-------|------------------|--------|------------------|--------|------------------|--------|
| rs714897         | 53256579 | G/A | 0.09 | 0.457 | 0.97 (0.89,1.06) | 0.118  | 0.92 (0.83,1.02) | 0.224  | 0.92 (0.8,1.05)  | 0.975  |
| rs16955257       | 52942491 | C/A | 0.06 | 0.46  | 1.04 (0.93,1.16) | 0.796  | 1.02 (0.89,1.16) | 0.407  | 1.07 (0.91,1.27) | 0.822  |
| rs2628309        | 53115419 | A/G | 0.09 | 0.463 | 0.97 (0.89,1.06) | 0.201  | 0.93 (0.84,1.04) | 0.123  | 0.9 (0.78,1.03)  | 0.85   |
| rs2628305        | 53140427 | C/A | 0.09 | 0.466 | 0.97 (0.89,1.06) | 0.205  | 0.93 (0.84,1.04) | 0.13   | 0.9 (0.78,1.03)  | 0.865  |
| rs2541245        | 53101200 | A/G | 0.09 | 0.467 | 0.97 (0.89,1.06) | 0.197  | 0.93 (0.83,1.04) | 0.129  | 0.9 (0.78,1.03)  | 0.876  |
| rs2628322        | 53205356 | G/A | 0.17 | 0.467 | 1.03 (0.96,1.1)  | 0.395  | 0.96 (0.89,1.05) | 0.302  | 1.06 (0.95,1.18) | 0.0657 |
| ch17_pos52822633 | 52822633 | A/C | 0.06 | 0.469 | 1.04 (0.93,1.16) | 0.61   | 1.03 (0.91,1.18) | 0.195  | 1.12 (0.95,1.31) | 0.529  |
| ch17_pos53036109 | 53036109 | A/G | 0.25 | 0.471 | 1.02 (0.96,1.08) | 0.478  | 0.97 (0.91,1.05) | 0.899  | 0.99 (0.9,1.09)  | 0.483  |
| rs4794540        | 52945104 | G/A | 0.49 | 0.474 | 0.98 (0.93,1.03) | 0.941  | 1 (0.94,1.07)    | 0.578  | 0.98 (0.9,1.06)  | 0.493  |
| rs2529499        | 53188361 | G/A | 0.17 | 0.475 | 1.02 (0.96,1.1)  | 0.365  | 0.96 (0.89,1.05) | 0.277  | 1.06 (0.95,1.18) | 0.0567 |
| rs2529500        | 53188379 | G/A | 0.17 | 0.475 | 1.02 (0.96,1.1)  | 0.365  | 0.96 (0.89,1.05) | 0.277  | 1.06 (0.95,1.18) | 0.0567 |
| rs11079128       | 52867748 | G/A | 0.33 | 0.476 | 1.02 (0.97,1.08) | 0.945  | 1 (0.93,1.07)    | 0.205  | 1.06 (0.97,1.15) | 0.139  |
| rs11658717       | 53076986 | A/G | 0.09 | 0.478 | 0.97 (0.89,1.06) | 0.209  | 0.93 (0.84,1.04) | 0.129  | 0.9 (0.78,1.03)  | 0.85   |
| rs2628308        | 53123573 | G/C | 0.09 | 0.478 | 0.97 (0.89,1.06) | 0.209  | 0.93 (0.84,1.04) | 0.129  | 0.9 (0.78,1.03)  | 0.85   |
| rs2787507        | 53127924 | A/G | 0.09 | 0.481 | 0.97 (0.89,1.06) | 0.208  | 0.93 (0.84,1.04) | 0.129  | 0.9 (0.78,1.03)  | 0.85   |
| rs12947685       | 53045519 | A/G | 0.18 | 0.481 | 0.98 (0.91,1.04) | 0.0932 | 0.93 (0.86,1.01) | 0.908  | 1.01 (0.91,1.12) | 0.133  |
| rs1484776        | 53111383 | C/A | 0.09 | 0.482 | 0.97 (0.89,1.06) | 0.216  | 0.93 (0.84,1.04) | 0.125  | 0.9 (0.78,1.03)  | 0.833  |
| rs8075983        | 53271918 | G/A | 0.09 | 0.484 | 0.97 (0.89,1.06) | 0.125  | 0.92 (0.83,1.02) | 0.249  | 0.92 (0.8,1.06)  | 0.991  |
| rs2787499        | 53170985 | A/T | 0.15 | 0.485 | 1.03 (0.96,1.1)  | 0.392  | 0.96 (0.88,1.05) | 0.303  | 1.06 (0.95,1.18) | 0.0693 |
| ch17_pos52974643 | 52974643 | C/G | 0.2  | 0.49  | 0.98 (0.92,1.04) | 0.251  | 0.96 (0.89,1.03) | 0.263  | 0.94 (0.85,1.04) | 0.994  |
| rs16955267       | 52943855 | G/C | 0.48 | 0.491 | 0.98 (0.93,1.03) | 0.981  | 1 (0.94,1.06)    | 0.498  | 0.97 (0.9,1.05)  | 0.476  |
| rs16955290       | 52949534 | T/A | 0.17 | 0.492 | 0.98 (0.91,1.04) | 0.773  | 1.01 (0.93,1.1)  | 0.0837 | 0.91 (0.81,1.01) | 0.0981 |
| rs1484770        | 53168340 | G/A | 0.15 | 0.493 | 1.02 (0.96,1.1)  | 0.41   | 0.96 (0.88,1.05) | 0.336  | 1.06 (0.95,1.18) | 0.0836 |
| rs8072827        | 53073858 | A/G | 0.17 | 0.494 | 1.02 (0.96,1.1)  | 0.417  | 0.97 (0.89,1.05) | 0.348  | 1.05 (0.95,1.17) | 0.115  |
| rs2541240        | 53042872 | G/A | 0.31 | 0.498 | 1.02 (0.96,1.08) | 0.511  | 1.02 (0.96,1.09) | 0.108  | 1.07 (0.98,1.17) | 0.568  |
| rs1156287        | 53076799 | A/G | 0.09 | 0.502 | 0.97 (0.89,1.06) | 0.221  | 0.93 (0.84,1.04) | 0.133  | 0.9 (0.78,1.03)  | 0.841  |
| rs1484771        | 53168495 | A/C | 0.15 | 0.502 | 1.02 (0.96,1.1)  | 0.386  | 0.96 (0.88,1.05) | 0.328  | 1.06 (0.95,1.18) | 0.073  |
| rs1962045        | 52996150 | G/A | 0.12 | 0.507 | 1.03 (0.95,1.11) | 0.59   | 0.97 (0.89,1.07) | 0.834  | 0.99 (0.87,1.11) | 0.765  |
| rs4372751        | 52986725 | G/A | 0.28 | 0.511 | 1.02 (0.96,1.08) | 0.396  | 1.03 (0.96,1.1)  | 0.0944 | 1.08 (0.99,1.18) | 0.771  |
| rs35496173       | 52896367 | C/A | 0.32 | 0.511 | 1.02 (0.96,1.08) | 0.87   | 0.99 (0.93,1.06) | 0.278  | 1.05 (0.96,1.14) | 0.165  |

|                  |          |     |      |       |                  |        |                  |        |                  |         |
|------------------|----------|-----|------|-------|------------------|--------|------------------|--------|------------------|---------|
| rs2628319        | 53210110 | G/A | 0.17 | 0.513 | 1.02 (0.96,1.09) | 0.355  | 0.96 (0.88,1.05) | 0.29   | 1.06 (0.95,1.18) | 0.0577  |
| rs9910653        | 52992268 | G/A | 0.23 | 0.513 | 0.98 (0.92,1.04) | 0.158  | 0.95 (0.88,1.02) | 0.45   | 0.96 (0.88,1.06) | 0.681   |
| rs17817950       | 53045325 | G/A | 0.18 | 0.516 | 0.98 (0.92,1.04) | 0.101  | 0.93 (0.86,1.01) | 0.848  | 1.01 (0.91,1.12) | 0.124   |
| rs9899545        | 52986845 | A/G | 0.13 | 0.519 | 0.98 (0.91,1.05) | 0.0649 | 0.92 (0.84,1.01) | 0.215  | 0.93 (0.83,1.04) | 0.67    |
| rs2787495        | 53159626 | G/C | 0.15 | 0.52  | 1.02 (0.95,1.1)  | 0.39   | 0.96 (0.88,1.05) | 0.336  | 1.06 (0.95,1.18) | 0.0848  |
| rs8070668        | 52991636 | A/G | 0.31 | 0.525 | 1.02 (0.96,1.08) | 0.46   | 1.03 (0.96,1.1)  | 0.0909 | 1.08 (0.99,1.17) | 0.61    |
| rs9895901        | 52984885 | A/G | 0.25 | 0.53  | 0.98 (0.93,1.04) | 0.138  | 0.95 (0.88,1.02) | 0.325  | 0.95 (0.87,1.05) | 0.633   |
| rs17635420       | 52833331 | A/C | 0.17 | 0.536 | 1.02 (0.95,1.09) | 0.514  | 1.03 (0.95,1.12) | 0.712  | 0.98 (0.88,1.09) | 0.426   |
| rs7216138        | 52995664 | G/A | 0.23 | 0.536 | 0.98 (0.92,1.04) | 0.154  | 0.95 (0.88,1.02) | 0.49   | 0.97 (0.88,1.06) | 0.637   |
| rs12602751       | 52994174 | C/A | 0.23 | 0.54  | 0.98 (0.92,1.04) | 0.157  | 0.95 (0.88,1.02) | 0.512  | 0.97 (0.88,1.07) | 0.609   |
| rs2111098        | 53174171 | G/A | 0.16 | 0.542 | 1.02 (0.95,1.1)  | 0.37   | 0.96 (0.88,1.05) | 0.343  | 1.05 (0.94,1.18) | 0.0753  |
| rs1026961        | 53155666 | G/A | 0.15 | 0.544 | 1.02 (0.95,1.1)  | 0.344  | 0.96 (0.88,1.05) | 0.344  | 1.05 (0.94,1.18) | 0.0729  |
| rs2958907        | 52850855 | A/G | 0.44 | 0.547 | 0.98 (0.94,1.04) | 0.742  | 1.01 (0.95,1.07) | 0.0153 | 0.9 (0.83,0.98)  | 0.00858 |
| rs17818040       | 53083891 | G/A | 0.17 | 0.548 | 1.02 (0.95,1.09) | 0.391  | 0.96 (0.89,1.05) | 0.353  | 1.05 (0.95,1.17) | 0.115   |
| rs9904377        | 52985982 | G/A | 0.25 | 0.556 | 0.98 (0.93,1.04) | 0.156  | 0.95 (0.88,1.02) | 0.352  | 0.96 (0.87,1.05) | 0.641   |
| rs35079296       | 52994210 | A/C | 0.12 | 0.557 | 1.02 (0.95,1.1)  | 0.618  | 0.98 (0.89,1.07) | 0.736  | 0.98 (0.87,1.1)  | 0.862   |
| rs2787481        | 53211110 | A/G | 0.1  | 0.559 | 0.98 (0.9,1.06)  | 0.178  | 0.93 (0.84,1.03) | 0.151  | 0.91 (0.79,1.04) | 0.857   |
| rs2958914        | 52975937 | A/G | 0.26 | 0.559 | 0.98 (0.93,1.04) | 0.533  | 0.98 (0.91,1.05) | 0.642  | 0.98 (0.89,1.07) | 0.755   |
| rs7222890        | 52989060 | T/A | 0.28 | 0.566 | 1.02 (0.96,1.08) | 0.457  | 1.03 (0.96,1.1)  | 0.0982 | 1.08 (0.99,1.18) | 0.725   |
| rs2958913        | 52976942 | G/C | 0.38 | 0.567 | 1.02 (0.96,1.07) | 0.747  | 0.99 (0.93,1.05) | 0.455  | 1.03 (0.95,1.12) | 0.599   |
| rs9914088        | 52979985 | A/G | 0.25 | 0.568 | 0.98 (0.93,1.04) | 0.147  | 0.95 (0.88,1.02) | 0.346  | 0.96 (0.87,1.05) | 0.618   |
| ch17_pos53120203 | 53120203 | A/G | 0.17 | 0.569 | 1.02 (0.95,1.09) | 0.361  | 0.96 (0.88,1.05) | 0.409  | 1.05 (0.94,1.17) | 0.118   |
| rs2787506        | 53110072 | A/G | 0.17 | 0.573 | 1.02 (0.95,1.09) | 0.358  | 0.96 (0.88,1.05) | 0.41   | 1.05 (0.94,1.17) | 0.118   |
| rs2787475        | 53215644 | A/G | 0.17 | 0.574 | 1.02 (0.95,1.09) | 0.312  | 0.96 (0.88,1.04) | 0.334  | 1.05 (0.95,1.17) | 0.0619  |
| rs17745091       | 52938797 | G/A | 0.34 | 0.574 | 1.02 (0.96,1.07) | 0.238  | 0.96 (0.9,1.03)  | 0.083  | 1.08 (0.99,1.17) | 0.0176  |
| rs9908752        | 52983216 | G/A | 0.25 | 0.577 | 0.98 (0.93,1.04) | 0.152  | 0.95 (0.88,1.02) | 0.35   | 0.96 (0.87,1.05) | 0.61    |
| rs244317         | 53216985 | T/A | 0.1  | 0.578 | 0.98 (0.9,1.06)  | 0.185  | 0.93 (0.84,1.03) | 0.156  | 0.91 (0.79,1.04) | 0.857   |
| rs2541244        | 53100168 | A/G | 0.17 | 0.58  | 1.02 (0.95,1.09) | 0.332  | 0.96 (0.88,1.04) | 0.383  | 1.05 (0.94,1.17) | 0.0961  |
| rs1933325        | 53148136 | G/A | 0.17 | 0.584 | 1.02 (0.95,1.09) | 0.351  | 0.96 (0.88,1.05) | 0.414  | 1.05 (0.94,1.17) | 0.118   |
| rs12452447       | 52964587 | C/A | 0.05 | 0.585 | 0.97 (0.86,1.09) | 0.66   | 1.03 (0.89,1.2)  | 0.569  | 0.95 (0.78,1.15) | 0.501   |

|                  |          |     |      |       |                  |        |                  |        |                  |        |
|------------------|----------|-----|------|-------|------------------|--------|------------------|--------|------------------|--------|
| rs17818058       | 53084124 | A/G | 0.17 | 0.585 | 1.02 (0.95,1.09) | 0.35   | 0.96 (0.88,1.05) | 0.418  | 1.05 (0.94,1.17) | 0.118  |
| rs17745391       | 53071872 | A/G | 0.17 | 0.586 | 1.02 (0.95,1.09) | 0.365  | 0.96 (0.88,1.05) | 0.395  | 1.05 (0.94,1.17) | 0.112  |
| rs9899602        | 52986908 | A/G | 0.13 | 0.588 | 0.98 (0.91,1.06) | 0.0732 | 0.92 (0.84,1.01) | 0.235  | 0.93 (0.83,1.05) | 0.655  |
| rs2628301        | 53159273 | G/A | 0.09 | 0.593 | 0.98 (0.89,1.07) | 0.19   | 0.93 (0.83,1.04) | 0.215  | 0.92 (0.8,1.05)  | 0.968  |
| rs9897646        | 52985351 | G/C | 0.13 | 0.594 | 0.98 (0.91,1.06) | 0.0694 | 0.92 (0.84,1.01) | 0.239  | 0.93 (0.83,1.05) | 0.644  |
| rs1351888        | 53149239 | G/A | 0.17 | 0.596 | 1.02 (0.95,1.09) | 0.342  | 0.96 (0.88,1.04) | 0.425  | 1.05 (0.94,1.16) | 0.118  |
| rs17683844       | 52965694 | A/G | 0.16 | 0.598 | 0.98 (0.91,1.05) | 0.288  | 0.96 (0.88,1.04) | 0.186  | 0.93 (0.83,1.04) | 0.608  |
| rs244315         | 53214654 | G/A | 0.1  | 0.599 | 0.98 (0.9,1.06)  | 0.182  | 0.93 (0.84,1.03) | 0.173  | 0.91 (0.79,1.04) | 0.893  |
| rs1564821        | 53248927 | G/A | 0.12 | 0.599 | 0.98 (0.91,1.06) | 0.0873 | 0.92 (0.83,1.01) | 0.302  | 1.07 (0.94,1.2)  | 0.012  |
| rs17745201       | 53027561 | A/T | 0.05 | 0.6   | 1.03 (0.92,1.16) | 0.47   | 0.95 (0.82,1.09) | 0.812  | 0.98 (0.81,1.17) | 0.652  |
| rs4436838        | 52947714 | A/C | 0.17 | 0.601 | 0.98 (0.92,1.05) | 0.694  | 1.02 (0.94,1.1)  | 0.116  | 0.92 (0.82,1.02) | 0.108  |
| rs9913784        | 52989071 | T/A | 0.25 | 0.601 | 0.98 (0.93,1.04) | 0.175  | 0.95 (0.89,1.02) | 0.33   | 0.96 (0.87,1.05) | 0.704  |
| rs2958921        | 52965793 | G/A | 0.26 | 0.601 | 0.98 (0.93,1.04) | 0.932  | 1 (0.93,1.07)    | 0.336  | 0.96 (0.87,1.05) | 0.496  |
| rs2628303        | 53158106 | G/A | 0.17 | 0.602 | 1.02 (0.95,1.09) | 0.346  | 0.96 (0.88,1.04) | 0.412  | 1.05 (0.94,1.17) | 0.109  |
| rs12453444       | 52839090 | A/G | 0.08 | 0.604 | 1.02 (0.93,1.12) | 0.444  | 0.96 (0.85,1.07) | 0.0428 | 1.16 (1.01,1.34) | 0.0151 |
| rs7210248        | 52964283 | G/A | 0.21 | 0.605 | 0.98 (0.92,1.05) | 0.664  | 0.98 (0.91,1.06) | 0.707  | 0.98 (0.89,1.09) | 0.956  |
| rs2787497        | 53176211 | A/G | 0.1  | 0.611 | 0.98 (0.9,1.06)  | 0.177  | 0.93 (0.84,1.03) | 0.194  | 0.91 (0.8,1.05)  | 0.933  |
| rs2628299        | 53160946 | C/A | 0.17 | 0.613 | 1.02 (0.95,1.09) | 0.342  | 0.96 (0.88,1.04) | 0.453  | 1.04 (0.94,1.16) | 0.125  |
| rs16955774       | 53272003 | A/G | 0.17 | 0.615 | 0.98 (0.92,1.05) | 0.515  | 0.97 (0.9,1.06)  | 0.904  | 0.99 (0.89,1.11) | 0.699  |
| rs4794530        | 52837689 | G/A | 0.31 | 0.623 | 1.01 (0.96,1.07) | 0.431  | 1.03 (0.96,1.1)  | 0.9    | 0.99 (0.91,1.09) | 0.41   |
| rs17745123       | 52988232 | C/A | 0.13 | 0.626 | 0.98 (0.91,1.06) | 0.0746 | 0.92 (0.84,1.01) | 0.235  | 0.93 (0.83,1.05) | 0.662  |
| rs244302         | 53238871 | G/A | 0.14 | 0.63  | 1.02 (0.95,1.1)  | 0.466  | 0.97 (0.88,1.06) | 0.239  | 1.07 (0.96,1.2)  | 0.0439 |
| rs2787498        | 53172871 | A/G | 0.17 | 0.63  | 1.02 (0.95,1.09) | 0.302  | 0.96 (0.88,1.04) | 0.415  | 1.05 (0.94,1.17) | 0.0966 |
| rs9895808        | 53048442 | C/G | 0.09 | 0.631 | 0.98 (0.9,1.07)  | 0.262  | 0.94 (0.84,1.05) | 0.173  | 0.91 (0.79,1.04) | 0.832  |
| ch17_pos52850065 | 52850065 | T/A | 0.1  | 0.637 | 1.02 (0.94,1.11) | 0.516  | 1.03 (0.93,1.14) | 0.558  | 0.96 (0.84,1.1)  | 0.219  |
| rs11079130       | 52889930 | G/A | 0.46 | 0.644 | 1.01 (0.96,1.07) | 0.785  | 1.01 (0.95,1.07) | 0.422  | 1.03 (0.95,1.12) | 0.485  |
| rs244358         | 53192231 | G/A | 0.09 | 0.645 | 0.98 (0.9,1.07)  | 0.19   | 0.93 (0.83,1.04) | 0.223  | 0.92 (0.8,1.06)  | 0.923  |
| rs2958891        | 52881683 | A/G | 0.2  | 0.645 | 0.99 (0.92,1.05) | 0.306  | 0.96 (0.89,1.04) | 0.29   | 1.06 (0.95,1.17) | 0.103  |
| rs244304         | 53237959 | A/G | 0.14 | 0.648 | 1.02 (0.95,1.09) | 0.436  | 0.96 (0.88,1.06) | 0.246  | 1.07 (0.95,1.2)  | 0.0422 |
| rs2332307        | 52944043 | A/G | 0.19 | 0.65  | 0.99 (0.92,1.05) | 0.24   | 0.95 (0.88,1.03) | 0.528  | 1.03 (0.93,1.14) | 0.215  |

|                  |          |     |      |       |                  |       |                  |       |                  |        |
|------------------|----------|-----|------|-------|------------------|-------|------------------|-------|------------------|--------|
| ch17_pos52881093 | 52881093 | A/G | 0.04 | 0.651 | 0.97 (0.86,1.1)  | 0.709 | 0.97 (0.83,1.14) | 0.454 | 1.08 (0.89,1.31) | 0.307  |
| rs2958915        | 52975892 | A/C | 0.14 | 0.656 | 0.98 (0.91,1.06) | 0.509 | 0.97 (0.88,1.06) | 0.576 | 0.97 (0.85,1.09) | 0.846  |
| rs10468513       | 53062903 | C/A | 0.09 | 0.66  | 0.98 (0.9,1.07)  | 0.299 | 0.94 (0.85,1.05) | 0.163 | 0.91 (0.79,1.04) | 0.75   |
| rs7212889        | 52834061 | C/A | 0.16 | 0.66  | 1.02 (0.95,1.09) | 0.486 | 1.03 (0.95,1.12) | 0.541 | 0.97 (0.86,1.08) | 0.305  |
| rs2628296        | 53166495 | T/A | 0.1  | 0.661 | 0.98 (0.9,1.07)  | 0.212 | 0.94 (0.84,1.04) | 0.229 | 0.92 (0.8,1.05)  | 0.943  |
| rs1990674        | 53061075 | G/A | 0.09 | 0.662 | 0.98 (0.9,1.07)  | 0.297 | 0.94 (0.85,1.05) | 0.161 | 0.91 (0.79,1.04) | 0.758  |
| rs2958876        | 52904526 | A/G | 0.09 | 0.664 | 1.02 (0.93,1.12) | 0.94  | 1 (0.89,1.11)    | 0.459 | 1.06 (0.92,1.22) | 0.411  |
| rs17745344       | 53048319 | A/G | 0.09 | 0.666 | 0.98 (0.9,1.07)  | 0.299 | 0.94 (0.85,1.05) | 0.172 | 0.91 (0.79,1.04) | 0.779  |
| rs7219874        | 53065807 | G/A | 0.09 | 0.668 | 0.98 (0.9,1.07)  | 0.3   | 0.94 (0.85,1.05) | 0.162 | 0.91 (0.79,1.04) | 0.758  |
| rs9890971        | 53059776 | A/T | 0.09 | 0.668 | 0.98 (0.9,1.07)  | 0.3   | 0.94 (0.85,1.05) | 0.162 | 0.91 (0.79,1.04) | 0.758  |
| rs9892173        | 53060214 | G/A | 0.09 | 0.668 | 0.98 (0.9,1.07)  | 0.3   | 0.94 (0.85,1.05) | 0.162 | 0.91 (0.79,1.04) | 0.758  |
| rs9902718        | 53061622 | A/G | 0.09 | 0.668 | 0.98 (0.9,1.07)  | 0.3   | 0.94 (0.85,1.05) | 0.162 | 0.91 (0.79,1.04) | 0.758  |
| ch17_pos52917757 | 52917757 | C/A | 0.14 | 0.669 | 1.02 (0.94,1.09) | 0.435 | 1.04 (0.95,1.13) | 0.758 | 1.02 (0.9,1.15)  | 0.493  |
| rs6504949        | 53050133 | A/C | 0.09 | 0.67  | 0.98 (0.9,1.07)  | 0.302 | 0.94 (0.85,1.05) | 0.162 | 0.91 (0.79,1.04) | 0.754  |
| rs1029626        | 53220620 | A/G | 0.17 | 0.67  | 1.01 (0.95,1.09) | 0.343 | 0.96 (0.88,1.04) | 0.449 | 1.04 (0.94,1.16) | 0.0953 |
| rs12953288       | 53227444 | A/G | 0.17 | 0.67  | 1.01 (0.95,1.09) | 0.328 | 0.96 (0.88,1.04) | 0.47  | 1.04 (0.93,1.16) | 0.0974 |
| rs16954962       | 52816899 | G/A | 0.11 | 0.671 | 1.02 (0.94,1.1)  | 0.925 | 1 (0.91,1.1)     | 0.49  | 1.04 (0.92,1.18) | 0.805  |
| rs9916642        | 53054497 | A/G | 0.09 | 0.672 | 0.98 (0.9,1.07)  | 0.3   | 0.94 (0.85,1.05) | 0.162 | 0.91 (0.79,1.04) | 0.758  |
| rs9891865        | 53060033 | G/A | 0.09 | 0.676 | 0.98 (0.9,1.07)  | 0.308 | 0.95 (0.85,1.05) | 0.164 | 0.91 (0.79,1.04) | 0.75   |
| rs7221223        | 53059007 | A/G | 0.09 | 0.679 | 0.98 (0.9,1.07)  | 0.306 | 0.95 (0.85,1.05) | 0.164 | 0.91 (0.79,1.04) | 0.758  |
| rs6504948        | 53049987 | A/G | 0.09 | 0.681 | 0.98 (0.9,1.07)  | 0.3   | 0.94 (0.85,1.05) | 0.176 | 0.91 (0.79,1.04) | 0.794  |
| rs9896044        | 53048542 | C/G | 0.09 | 0.681 | 0.98 (0.9,1.07)  | 0.3   | 0.94 (0.85,1.05) | 0.176 | 0.91 (0.79,1.04) | 0.794  |
| rs2191230        | 52869571 | C/G | 0.45 | 0.681 | 1.01 (0.96,1.06) | 0.913 | 1 (0.94,1.06)    | 0.388 | 1.04 (0.96,1.12) | 0.263  |
| rs9914836        | 52997875 | C/G | 0.1  | 0.683 | 0.98 (0.9,1.07)  | 0.18  | 0.93 (0.84,1.03) | 0.111 | 0.9 (0.78,1.03)  | 0.795  |
| rs6504950        | 53056471 | G/A | 0.09 | 0.685 | 0.98 (0.9,1.07)  | 0.317 | 0.95 (0.85,1.05) | 0.162 | 0.91 (0.79,1.04) | 0.738  |
| rs7219986        | 53263207 | G/A | 0.17 | 0.69  | 0.99 (0.92,1.06) | 0.515 | 0.97 (0.9,1.06)  | 0.991 | 1 (0.9,1.11)     | 0.629  |
| rs17711168       | 53225017 | A/G | 0.17 | 0.693 | 1.01 (0.95,1.08) | 0.333 | 0.96 (0.88,1.04) | 0.452 | 1.04 (0.94,1.16) | 0.0933 |
| rs7222197        | 53047499 | G/A | 0.09 | 0.694 | 0.98 (0.9,1.07)  | 0.303 | 0.94 (0.85,1.05) | 0.178 | 0.91 (0.79,1.04) | 0.794  |
| rs4793786        | 53228869 | A/C | 0.17 | 0.698 | 1.01 (0.95,1.08) | 0.321 | 0.96 (0.88,1.04) | 0.443 | 1.04 (0.94,1.16) | 0.0865 |
| rs16954966       | 52818980 | G/A | 0.31 | 0.698 | 1.01 (0.96,1.07) | 0.322 | 1.03 (0.97,1.1)  | 0.757 | 0.99 (0.9,1.08)  | 0.346  |

|                  |          |     |      |       |                  |        |                  |        |                  |        |
|------------------|----------|-----|------|-------|------------------|--------|------------------|--------|------------------|--------|
| rs4794549        | 53046726 | C/A | 0.19 | 0.709 | 0.99 (0.93,1.05) | 0.133  | 0.94 (0.87,1.02) | 0.842  | 1.01 (0.91,1.12) | 0.147  |
| rs17708843       | 52838076 | T/A | 0.13 | 0.712 | 0.99 (0.91,1.06) | 0.367  | 0.96 (0.87,1.05) | 0.853  | 1.01 (0.89,1.14) | 0.354  |
| rs12938755       | 52920878 | A/G | 0.16 | 0.713 | 0.99 (0.92,1.06) | 0.527  | 1.03 (0.94,1.12) | 0.0709 | 0.9 (0.8,1.01)   | 0.0426 |
| rs17682072       | 52915390 | G/A | 0.17 | 0.714 | 1.01 (0.95,1.08) | 0.701  | 1.02 (0.94,1.1)  | 0.72   | 1.02 (0.92,1.13) | 0.783  |
| rs8064882        | 53046209 | G/A | 0.19 | 0.718 | 0.99 (0.93,1.05) | 0.132  | 0.94 (0.87,1.02) | 0.818  | 1.01 (0.91,1.12) | 0.141  |
| rs2958943        | 52948531 | G/A | 0.14 | 0.719 | 0.99 (0.92,1.06) | 0.0828 | 0.92 (0.85,1.01) | 0.3    | 1.06 (0.95,1.19) | 0.0521 |
| rs11657917       | 52918326 | C/A | 0.15 | 0.719 | 1.01 (0.94,1.09) | 0.496  | 1.03 (0.95,1.12) | 0.716  | 1.02 (0.91,1.14) | 0.549  |
| rs9907270        | 53266415 | G/A | 0.1  | 0.723 | 0.98 (0.9,1.07)  | 0.264  | 0.94 (0.85,1.05) | 0.418  | 0.95 (0.82,1.08) | 0.989  |
| rs11653075       | 52873744 | G/A | 0.36 | 0.726 | 1.01 (0.96,1.06) | 0.668  | 0.99 (0.92,1.05) | 0.172  | 1.06 (0.98,1.15) | 0.0614 |
| rs244336         | 53201502 | G/A | 0.09 | 0.728 | 0.98 (0.9,1.08)  | 0.241  | 0.94 (0.84,1.05) | 0.226  | 0.92 (0.8,1.06)  | 0.987  |
| rs17745322       | 52942748 | G/A | 0.04 | 0.734 | 0.98 (0.87,1.11) | 0.438  | 1.06 (0.92,1.22) | 0.622  | 0.95 (0.79,1.16) | 0.348  |
| rs2958875        | 52906122 | A/G | 0.27 | 0.747 | 1.01 (0.95,1.07) | 0.613  | 1.02 (0.95,1.09) | 0.492  | 0.97 (0.89,1.06) | 0.407  |
| rs2934909        | 52948507 | T/A | 0.14 | 0.761 | 0.99 (0.92,1.06) | 0.1    | 0.93 (0.85,1.01) | 0.305  | 1.06 (0.95,1.19) | 0.0584 |
| rs2907639        | 52882437 | A/C | 0.23 | 0.763 | 1.01 (0.95,1.07) | 0.811  | 0.99 (0.92,1.07) | 0.605  | 1.03 (0.93,1.13) | 0.386  |
| rs16955309       | 52961757 | G/A | 0.33 | 0.763 | 0.99 (0.94,1.05) | 0.776  | 0.99 (0.93,1.06) | 0.604  | 1.02 (0.94,1.12) | 0.667  |
| rs2907659        | 52898034 | G/A | 0.2  | 0.765 | 0.99 (0.93,1.06) | 0.35   | 0.96 (0.89,1.04) | 0.22   | 1.07 (0.96,1.18) | 0.0899 |
| rs12449648       | 52871802 | G/A | 0.47 | 0.776 | 1.01 (0.96,1.06) | 0.982  | 1 (0.94,1.07)    | 0.491  | 1.03 (0.95,1.12) | 0.445  |
| rs8076678        | 53284506 | A/T | 0.06 | 0.783 | 1.02 (0.91,1.14) | 0.423  | 0.95 (0.82,1.08) | 0.625  | 1.05 (0.87,1.25) | 0.296  |
| rs4793781        | 52962115 | G/A | 0.16 | 0.785 | 0.99 (0.92,1.06) | 0.47   | 0.97 (0.89,1.06) | 0.871  | 0.99 (0.89,1.11) | 0.835  |
| rs12936957       | 53058202 | A/G | 0.19 | 0.785 | 0.99 (0.93,1.06) | 0.166  | 0.94 (0.87,1.02) | 0.78   | 1.01 (0.91,1.13) | 0.158  |
| rs1008524        | 53263720 | G/A | 0.15 | 0.786 | 1.01 (0.94,1.08) | 0.293  | 0.95 (0.87,1.04) | 0.144  | 1.09 (0.97,1.22) | 0.0161 |
| rs2787480        | 53102900 | G/A | 0.13 | 0.787 | 0.99 (0.92,1.07) | 0.12   | 0.93 (0.85,1.02) | 0.333  | 1.06 (0.94,1.19) | 0.0335 |
| rs28558726       | 53058676 | A/G | 0.1  | 0.788 | 0.99 (0.91,1.08) | 0.367  | 0.95 (0.86,1.06) | 0.256  | 0.92 (0.81,1.06) | 0.842  |
| rs9892976        | 53060329 | G/A | 0.1  | 0.788 | 0.99 (0.91,1.08) | 0.367  | 0.95 (0.86,1.06) | 0.256  | 0.92 (0.81,1.06) | 0.842  |
| rs10491163       | 52816901 | G/A | 0.23 | 0.792 | 0.99 (0.93,1.05) | 0.994  | 1 (0.93,1.07)    | 0.508  | 0.97 (0.88,1.07) | 0.517  |
| rs7359696        | 53066189 | A/G | 0.19 | 0.794 | 0.99 (0.93,1.06) | 0.162  | 0.94 (0.87,1.02) | 0.729  | 1.02 (0.92,1.13) | 0.13   |
| ch17_pos52975265 | 52975265 | G/C | 0.13 | 0.797 | 0.99 (0.92,1.07) | 0.119  | 0.93 (0.85,1.02) | 0.298  | 0.94 (0.83,1.06) | 0.721  |
| rs4794538        | 52925502 | A/G | 0.1  | 0.804 | 1.01 (0.93,1.1)  | 0.942  | 1 (0.91,1.11)    | 0.381  | 1.06 (0.93,1.21) | 0.501  |
| rs16955329       | 52969128 | A/C | 0.43 | 0.806 | 1.01 (0.96,1.06) | 0.277  | 1.03 (0.97,1.1)  | 0.983  | 1 (0.92,1.08)    | 0.216  |
| rs17745332       | 53047994 | G/A | 0.19 | 0.81  | 0.99 (0.93,1.06) | 0.166  | 0.95 (0.87,1.02) | 0.752  | 1.02 (0.92,1.13) | 0.143  |

|                  |          |     |      |       |                  |       |                  |        |                  |        |
|------------------|----------|-----|------|-------|------------------|-------|------------------|--------|------------------|--------|
| rs12952523       | 53044084 | C/A | 0.09 | 0.811 | 0.99 (0.9,1.08)  | 0.27  | 0.94 (0.84,1.05) | 0.751  | 1.02 (0.89,1.18) | 0.187  |
| rs17818028       | 53062755 | G/C | 0.09 | 0.812 | 0.99 (0.91,1.08) | 0.405 | 0.96 (0.86,1.06) | 0.198  | 0.91 (0.79,1.05) | 0.684  |
| rs9909390        | 52839122 | T/A | 0.08 | 0.818 | 1.01 (0.92,1.11) | 0.438 | 0.95 (0.85,1.07) | 0.118  | 1.13 (0.97,1.31) | 0.0303 |
| rs244348         | 53196291 | G/A | 0.09 | 0.818 | 0.99 (0.91,1.08) | 0.329 | 0.95 (0.85,1.06) | 0.25   | 0.92 (0.8,1.06)  | 0.949  |
| rs12452421       | 52876664 | G/A | 0.47 | 0.818 | 1.01 (0.96,1.06) | 0.96  | 1 (0.94,1.06)    | 0.554  | 1.02 (0.94,1.11) | 0.443  |
| rs34946336       | 53033200 | G/A | 0.12 | 0.823 | 1.01 (0.93,1.09) | 0.523 | 0.97 (0.87,1.07) | 0.747  | 0.98 (0.86,1.12) | 0.679  |
| rs17635965       | 52852700 | A/G | 0.13 | 0.824 | 1.01 (0.93,1.09) | 0.815 | 0.99 (0.9,1.09)  | 0.406  | 1.05 (0.93,1.18) | 0.097  |
| rs34918041       | 53048027 | G/A | 0.19 | 0.824 | 0.99 (0.93,1.06) | 0.175 | 0.95 (0.87,1.03) | 0.752  | 1.02 (0.92,1.13) | 0.148  |
| rs2877636        | 53006043 | A/G | 0.12 | 0.826 | 1.01 (0.93,1.09) | 0.447 | 0.96 (0.87,1.06) | 0.975  | 1 (0.88,1.14)    | 0.419  |
| rs2643025        | 53059082 | G/A | 0.02 | 0.829 | 0.98 (0.82,1.17) | 0.75  | 1.04 (0.83,1.29) | 0.943  | 1.01 (0.77,1.32) | 0.735  |
| rs2907623        | 52858375 | G/A | 0.44 | 0.829 | 1.01 (0.96,1.06) | 0.242 | 1.04 (0.98,1.1)  | 0.0799 | 0.93 (0.86,1.01) | 0.0164 |
| rs6504944        | 52972640 | G/A | 0.44 | 0.831 | 0.99 (0.94,1.05) | 0.476 | 1.02 (0.96,1.09) | 0.816  | 1.01 (0.93,1.1)  | 0.533  |
| rs17636218       | 52861905 | G/A | 0.13 | 0.832 | 1.01 (0.93,1.09) | 0.948 | 1 (0.91,1.1)     | 0.576  | 1.03 (0.92,1.17) | 0.284  |
| rs12940239       | 53068930 | A/G | 0.3  | 0.836 | 1.01 (0.95,1.06) | 0.223 | 0.96 (0.9,1.03)  | 0.836  | 1.01 (0.92,1.1)  | 0.19   |
| rs16955165       | 52907475 | C/A | 0.04 | 0.837 | 1.01 (0.89,1.15) | 0.825 | 1.02 (0.86,1.2)  | 0.202  | 1.14 (0.93,1.4)  | 0.321  |
| rs9903810        | 53016053 | T/A | 0.12 | 0.838 | 1.01 (0.93,1.09) | 0.436 | 0.96 (0.87,1.06) | 0.884  | 0.99 (0.87,1.13) | 0.462  |
| rs16955299       | 52957210 | A/G | 0.34 | 0.839 | 0.99 (0.94,1.05) | 0.726 | 0.99 (0.93,1.06) | 0.567  | 1.03 (0.94,1.12) | 0.607  |
| rs28564882       | 52989598 | G/A | 0.15 | 0.843 | 1.01 (0.94,1.08) | 0.286 | 0.95 (0.88,1.04) | 0.749  | 0.98 (0.88,1.1)  | 0.494  |
| rs2191231        | 52874735 | G/A | 0.13 | 0.846 | 1.01 (0.93,1.09) | 0.913 | 0.99 (0.91,1.09) | 0.29   | 1.07 (0.95,1.2)  | 0.222  |
| rs4794548        | 53014955 | C/G | 0.28 | 0.849 | 1.01 (0.95,1.06) | 0.194 | 1.05 (0.98,1.12) | 0.175  | 0.94 (0.86,1.03) | 0.0446 |
| rs17817829       | 53010381 | A/C | 0.12 | 0.85  | 1.01 (0.93,1.09) | 0.415 | 0.96 (0.87,1.06) | 0.947  | 1 (0.87,1.13)    | 0.423  |
| ch17_pos52931737 | 52931737 | A/G | 0.1  | 0.851 | 1.01 (0.93,1.1)  | 0.974 | 1 (0.9,1.11)     | 0.364  | 1.06 (0.93,1.21) | 0.438  |
| rs8066559        | 52930583 | C/G | 0.15 | 0.852 | 0.99 (0.92,1.07) | 0.612 | 1.02 (0.94,1.11) | 0.114  | 0.91 (0.81,1.02) | 0.068  |
| rs16955153       | 52890788 | A/G | 0.04 | 0.855 | 0.99 (0.87,1.12) | 0.818 | 0.98 (0.83,1.16) | 0.257  | 1.12 (0.92,1.37) | 0.226  |
| rs2332297        | 52918241 | A/G | 0.12 | 0.855 | 1.01 (0.93,1.09) | 0.692 | 1.02 (0.93,1.12) | 0.656  | 1.03 (0.91,1.16) | 0.857  |
| rs35698820       | 52974086 | A/G | 0.15 | 0.857 | 0.99 (0.93,1.07) | 0.359 | 0.96 (0.88,1.05) | 0.956  | 1 (0.9,1.12)     | 0.502  |
| rs28658459       | 52955962 | G/A | 0.41 | 0.862 | 1 (0.95,1.06)    | 0.448 | 1.02 (0.96,1.09) | 0.998  | 1 (0.92,1.09)    | 0.488  |
| rs12948479       | 52957221 | G/A | 0.16 | 0.866 | 1.01 (0.94,1.08) | 0.746 | 0.99 (0.91,1.07) | 0.94   | 1 (0.9,1.12)     | 0.905  |
| rs17709877       | 52871114 | C/A | 0.1  | 0.867 | 0.99 (0.91,1.08) | 0.691 | 1.02 (0.92,1.13) | 0.234  | 0.92 (0.8,1.06)  | 0.12   |
| rs36024363       | 52977185 | C/G | 0.12 | 0.87  | 0.99 (0.92,1.07) | 0.94  | 1 (0.91,1.1)     | 0.941  | 1 (0.89,1.14)    | 0.803  |

|                  |          |     |      |       |                  |       |                  |       |                  |       |
|------------------|----------|-----|------|-------|------------------|-------|------------------|-------|------------------|-------|
| rs11871690       | 53025741 | G/A | 0.12 | 0.872 | 1.01 (0.93,1.09) | 0.395 | 0.96 (0.87,1.06) | 0.863 | 0.99 (0.87,1.13) | 0.441 |
| rs28364644       | 52977353 | A/G | 0.12 | 0.875 | 0.99 (0.92,1.07) | 0.989 | 1 (0.91,1.1)     | 0.954 | 1 (0.89,1.14)    | 0.868 |
| rs2877631        | 52863321 | G/A | 0.26 | 0.877 | 1 (0.95,1.06)    | 0.306 | 1.04 (0.97,1.11) | 0.525 | 0.97 (0.89,1.06) | 0.279 |
| rs8067139        | 52976319 | A/C | 0.36 | 0.879 | 1 (0.94,1.05)    | 0.432 | 1.03 (0.96,1.09) | 0.589 | 0.98 (0.9,1.06)  | 0.385 |
| rs8082622        | 53177567 | G/A | 0.09 | 0.886 | 0.99 (0.91,1.09) | 0.329 | 0.95 (0.85,1.06) | 0.325 | 0.93 (0.81,1.07) | 0.971 |
| rs12936375       | 53022866 | C/A | 0.12 | 0.894 | 1.01 (0.93,1.09) | 0.388 | 0.96 (0.86,1.06) | 0.864 | 0.99 (0.87,1.13) | 0.45  |
| ch17_pos53043196 | 53043196 | G/A | 0.12 | 0.894 | 1.01 (0.93,1.09) | 0.645 | 0.98 (0.88,1.08) | 0.997 | 1 (0.88,1.14)    | 0.622 |
| rs4793782        | 53025342 | G/A | 0.12 | 0.896 | 1.01 (0.93,1.09) | 0.388 | 0.96 (0.86,1.06) | 0.868 | 0.99 (0.87,1.13) | 0.446 |
| rs7208123        | 53006339 | G/A | 0.24 | 0.896 | 1 (0.94,1.06)    | 0.338 | 0.97 (0.9,1.04)  | 0.868 | 1.01 (0.92,1.11) | 0.319 |
| rs2907627        | 52863699 | G/A | 0.37 | 0.896 | 1 (0.95,1.06)    | 0.724 | 1.01 (0.95,1.08) | 0.687 | 1.02 (0.94,1.11) | 0.979 |
| rs11869723       | 53023385 | G/A | 0.12 | 0.897 | 1.01 (0.93,1.09) | 0.388 | 0.96 (0.86,1.06) | 0.864 | 0.99 (0.87,1.13) | 0.45  |
| rs11869726       | 53023489 | A/G | 0.12 | 0.897 | 1.01 (0.93,1.09) | 0.388 | 0.96 (0.86,1.06) | 0.864 | 0.99 (0.87,1.13) | 0.45  |
| rs41455544       | 52989776 | C/G | 0.12 | 0.9   | 1.01 (0.93,1.09) | 0.42  | 0.96 (0.87,1.06) | 0.904 | 0.99 (0.87,1.13) | 0.471 |
| rs12949687       | 52843506 | G/A | 0.13 | 0.9   | 1 (0.92,1.08)    | 0.77  | 0.99 (0.9,1.09)  | 0.661 | 1.03 (0.91,1.16) | 0.185 |
| rs2287136        | 53038082 | G/A | 0.12 | 0.904 | 1 (0.93,1.09)    | 0.425 | 0.96 (0.87,1.06) | 0.865 | 0.99 (0.87,1.13) | 0.477 |
| rs9891704        | 53010755 | A/G | 0.24 | 0.905 | 1 (0.94,1.06)    | 0.352 | 0.97 (0.9,1.04)  | 0.822 | 1.01 (0.92,1.11) | 0.301 |
| rs2024465        | 53034652 | A/G | 0.12 | 0.91  | 1 (0.93,1.09)    | 0.423 | 0.96 (0.87,1.06) | 0.868 | 0.99 (0.87,1.13) | 0.472 |
| ch17_pos53024410 | 53024410 | G/A | 0.12 | 0.911 | 1 (0.93,1.09)    | 0.423 | 0.96 (0.87,1.06) | 0.863 | 0.99 (0.87,1.13) | 0.477 |
| rs11869638       | 53043894 | A/G | 0.12 | 0.911 | 1 (0.93,1.09)    | 0.423 | 0.96 (0.87,1.06) | 0.863 | 0.99 (0.87,1.13) | 0.477 |
| rs11870311       | 53023891 | G/A | 0.12 | 0.911 | 1 (0.93,1.09)    | 0.423 | 0.96 (0.87,1.06) | 0.863 | 0.99 (0.87,1.13) | 0.477 |
| rs11871939       | 53043769 | G/A | 0.12 | 0.911 | 1 (0.93,1.09)    | 0.423 | 0.96 (0.87,1.06) | 0.863 | 0.99 (0.87,1.13) | 0.477 |
| rs17817865       | 53032425 | G/A | 0.12 | 0.911 | 1 (0.93,1.09)    | 0.423 | 0.96 (0.87,1.06) | 0.863 | 0.99 (0.87,1.13) | 0.477 |
| rs35551341       | 53032644 | A/G | 0.12 | 0.911 | 1 (0.93,1.09)    | 0.423 | 0.96 (0.87,1.06) | 0.863 | 0.99 (0.87,1.13) | 0.477 |
| rs7220451        | 52883230 | C/A | 0.04 | 0.913 | 0.99 (0.87,1.13) | 0.891 | 0.99 (0.84,1.16) | 0.234 | 1.13 (0.93,1.38) | 0.232 |
| rs34838222       | 52818321 | G/A | 0.21 | 0.915 | 1 (0.94,1.06)    | 0.917 | 1 (0.93,1.08)    | 0.357 | 0.95 (0.86,1.05) | 0.396 |
| rs12603899       | 53010098 | A/G | 0.24 | 0.915 | 1 (0.94,1.06)    | 0.344 | 0.97 (0.9,1.04)  | 0.812 | 1.01 (0.92,1.11) | 0.293 |
| rs7209926        | 53006324 | A/G | 0.24 | 0.915 | 1 (0.94,1.06)    | 0.357 | 0.97 (0.9,1.04)  | 0.868 | 1.01 (0.92,1.11) | 0.332 |
| ch17_pos53242391 | 53242391 | T/A | 0.02 | 0.916 | 1.01 (0.83,1.23) | 0.302 | 1.14 (0.89,1.45) | 0.529 | 1.1 (0.82,1.49)  | 0.852 |
| ch17_pos53009280 | 53009280 | C/A | 0.24 | 0.916 | 1 (0.94,1.06)    | 0.339 | 0.97 (0.9,1.04)  | 0.792 | 1.01 (0.92,1.11) | 0.287 |
| rs2332305        | 52978674 | A/T | 0.12 | 0.919 | 1 (0.92,1.08)    | 0.387 | 0.96 (0.87,1.06) | 0.728 | 0.98 (0.86,1.11) | 0.562 |



|                  |          |     |      |       |               |       |                  |        |                  |        |
|------------------|----------|-----|------|-------|---------------|-------|------------------|--------|------------------|--------|
| rs12949718       | 52981853 | G/A | 0.27 | 0.923 | 1 (0.95,1.06) | 0.339 | 0.97 (0.9,1.04)  | 0.988  | 1 (0.92,1.09)    | 0.342  |
| rs9900816        | 53012057 | G/A | 0.24 | 0.924 | 1 (0.94,1.06) | 0.347 | 0.97 (0.9,1.04)  | 0.806  | 1.01 (0.92,1.11) | 0.289  |
| rs35168324       | 52980004 | A/C | 0.12 | 0.925 | 1 (0.92,1.08) | 0.994 | 1 (0.91,1.1)     | 0.897  | 1.01 (0.89,1.14) | 0.82   |
| rs8064660        | 52975823 | G/A | 0.36 | 0.925 | 1 (0.95,1.06) | 0.367 | 1.03 (0.97,1.1)  | 0.639  | 0.98 (0.9,1.07)  | 0.412  |
| rs17745279       | 53042743 | A/C | 0.12 | 0.927 | 1 (0.93,1.09) | 0.405 | 0.96 (0.87,1.06) | 0.863  | 0.99 (0.87,1.13) | 0.468  |
| rs34391032       | 53028683 | G/A | 0.12 | 0.927 | 1 (0.93,1.09) | 0.417 | 0.96 (0.87,1.06) | 0.87   | 0.99 (0.87,1.13) | 0.461  |
| rs9907961        | 53012927 | C/G | 0.24 | 0.931 | 1 (0.94,1.06) | 0.349 | 0.97 (0.9,1.04)  | 0.773  | 1.01 (0.92,1.11) | 0.278  |
| rs12952699       | 52998340 | G/A | 0.11 | 0.935 | 1 (0.92,1.09) | 0.363 | 0.95 (0.86,1.06) | 0.91   | 0.99 (0.87,1.13) | 0.402  |
| rs8069447        | 53008873 | A/C | 0.36 | 0.939 | 1 (0.95,1.06) | 0.222 | 0.96 (0.9,1.02)  | 0.87   | 1.01 (0.93,1.1)  | 0.178  |
| rs11871985       | 53043979 | G/A | 0.12 | 0.942 | 1 (0.93,1.09) | 0.391 | 0.96 (0.86,1.06) | 0.863  | 0.99 (0.87,1.13) | 0.462  |
| rs9303360        | 53001456 | A/G | 0.35 | 0.944 | 1 (0.95,1.05) | 0.144 | 0.95 (0.89,1.02) | 0.896  | 1.01 (0.92,1.09) | 0.14   |
| rs2332312        | 52996429 | G/A | 0.12 | 0.95  | 1 (0.92,1.08) | 0.354 | 0.95 (0.86,1.05) | 0.793  | 0.98 (0.86,1.12) | 0.483  |
| rs1017099        | 52879063 | A/C | 0.47 | 0.954 | 1 (0.95,1.05) | 0.699 | 0.99 (0.93,1.05) | 0.748  | 1.01 (0.93,1.1)  | 0.441  |
| rs12941894       | 52843777 | A/G | 0.13 | 0.955 | 1 (0.93,1.08) | 0.847 | 0.99 (0.9,1.09)  | 0.691  | 1.02 (0.91,1.16) | 0.239  |
| rs2907626        | 52861335 | G/A | 0.44 | 0.955 | 1 (0.95,1.05) | 0.426 | 1.03 (0.96,1.09) | 0.0783 | 0.93 (0.86,1.01) | 0.0303 |
| rs244331         | 53266069 | G/A | 0.43 | 0.969 | 1 (0.95,1.05) | 0.46  | 0.98 (0.92,1.04) | 0.067  | 1.08 (0.99,1.17) | 0.0256 |
| rs2191232        | 52874930 | A/C | 0.13 | 0.978 | 1 (0.93,1.08) | 0.73  | 0.98 (0.9,1.08)  | 0.299  | 1.06 (0.95,1.2)  | 0.166  |
| rs12939352       | 53007655 | A/C | 0.36 | 0.978 | 1 (0.95,1.06) | 0.191 | 0.96 (0.9,1.02)  | 0.867  | 1.01 (0.93,1.1)  | 0.156  |
| ch17_pos52966078 | 52966078 | A/G | 0.09 | 0.982 | 1 (0.91,1.1)  | 0.386 | 1.05 (0.94,1.17) | 0.514  | 0.95 (0.82,1.1)  | 0.205  |
| rs8068574        | 52972247 | A/G | 0.46 | 0.982 | 1 (0.95,1.05) | 0.272 | 1.04 (0.97,1.1)  | 0.87   | 1.01 (0.93,1.09) | 0.352  |
| rs16955327       | 52967511 | T/A | 0.24 | 0.984 | 1 (0.94,1.06) | 0.366 | 1.03 (0.96,1.11) | 0.418  | 0.96 (0.87,1.06) | 0.143  |
| rs244332         | 53266012 | G/A | 0.43 | 0.987 | 1 (0.95,1.05) | 0.481 | 0.98 (0.92,1.04) | 0.069  | 1.08 (0.99,1.17) | 0.0287 |
| rs9904670        | 53000707 | G/A | 0.12 | 0.988 | 1 (0.92,1.09) | 0.36  | 0.95 (0.86,1.06) | 0.803  | 0.98 (0.86,1.12) | 0.478  |
| rs9915183        | 53047137 | G/A | 0.09 | 0.994 | 1 (0.92,1.09) | 0.545 | 0.97 (0.87,1.08) | 0.278  | 0.93 (0.81,1.06) | 0.744  |
| ch17_pos52963621 | 52963621 | A/G | 0.36 | 0.996 | 1 (0.95,1.05) | 0.875 | 1.01 (0.94,1.07) | 0.785  | 1.01 (0.93,1.1)  | 0.946  |

a: Build 37 coordinates on chromosome 17.

b: Major and minor allele.

c: Minor Allele Frequency.

d: P-value, Odds ratio (OR) and 95% Confidence Interval (CI) for association with Overall Breast Cancer Risk, Estrogen Positive (ER+) and Estrogen Negative (ER-) disease.

e: Case-only analysis, treating subtype status as a dependent variable, models adjusted for principal components and per-study fixed-effects .

**Supplementary Table 4: Association result of genotyped markers correlated ( $r^2 > 0.6$ ) with, and likelihood ratio (RL) of <1:100 relative to rs2787486 with respect to overall Risk among the two populations**

| SNP        | Position <sup>a</sup> | Maj/Min <sup>b</sup> | European                  |          |                  |                  |                  |         |                  |          |            | Asian                     |                  |         |                  |         |                  |                  |            |         |                  |         |  |
|------------|-----------------------|----------------------|---------------------------|----------|------------------|------------------|------------------|---------|------------------|----------|------------|---------------------------|------------------|---------|------------------|---------|------------------|------------------|------------|---------|------------------|---------|--|
|            |                       |                      | Overall Risk <sup>d</sup> |          |                  | ER+ <sup>d</sup> |                  |         | ER- <sup>d</sup> |          |            | Overall Risk <sup>d</sup> |                  |         | ER+ <sup>d</sup> |         |                  | ER- <sup>d</sup> |            |         | Het <sup>e</sup> |         |  |
|            |                       |                      | MAF <sup>c</sup>          | P-value  | OR (95%CI)       | P-value          | OR (95%CI)       | P-value | OR (95%CI)       | P-value  | OR (95%CI) | P-value                   | OR (95%CI)       | P-value | OR (95%CI)       | P-value | OR (95%CI)       | P-value          | OR (95%CI) | P-value | OR (95%CI)       | P-value |  |
| rs2787497  | 53176211              | A/G                  | 0.27                      | 9.27E-13 | 0.93 (0.91,0.95) | 3.52E-13         | 0.91 (0.89,0.93) | 0.0702  | 0.96 (0.92,1)    | 0.007276 | 0.1        | 0.611                     | 0.98 (0.9,1.06)  | 0.177   | 0.93 (0.84,1.03) | 0.194   | 0.91 (0.8,1.05)  | 0.933            |            |         |                  |         |  |
| rs8082622  | 53177567              | G/A                  | 0.27                      | 7.06E-13 | 0.93 (0.91,0.94) | 6.24E-13         | 0.91 (0.89,0.94) | 0.0528  | 0.96 (0.92,1)    | 0.011023 | 0.09       | 0.886                     | 0.99 (0.91,1.09) | 0.329   | 0.95 (0.85,1.06) | 0.325   | 0.93 (0.81,1.07) | 0.971            |            |         |                  |         |  |
| rs244358   | 53192231              | G/A                  | 0.27                      | 9.68E-13 | 0.93 (0.91,0.95) | 2.97E-13         | 0.91 (0.89,0.93) | 0.0893  | 0.97 (0.93,1.01) | 0.005256 | 0.09       | 0.645                     | 0.98 (0.9,1.07)  | 0.19    | 0.93 (0.83,1.04) | 0.223   | 0.92 (0.8,1.06)  | 0.923            |            |         |                  |         |  |
| rs244353   | 53194769              | G/A                  | 0.29                      | 5.75E-14 | 0.92 (0.9,0.94)  | 5.96E-14         | 0.91 (0.89,0.93) | 0.0275  | 0.96 (0.92,1)    | 0.015142 | 0.28       | 0.0026                    | 0.92 (0.87,0.97) | 0.0051  | 0.91 (0.85,0.97) | 0.0443  | 0.91 (0.83,1)    | 0.765            |            |         |                  |         |  |
| rs244348   | 53196291              | G/A                  | 0.27                      | 7.08E-13 | 0.93 (0.91,0.94) | 5.20E-13         | 0.91 (0.89,0.93) | 0.0547  | 0.96 (0.92,1)    | 0.010577 | 0.09       | 0.818                     | 0.99 (0.91,1.08) | 0.329   | 0.95 (0.85,1.06) | 0.25    | 0.92 (0.8,1.06)  | 0.949            |            |         |                  |         |  |
| rs244342   | 53198407              | G/A                  | 0.29                      | 6.73E-14 | 0.92 (0.9,0.94)  | 7.48E-14         | 0.91 (0.89,0.93) | 0.03    | 0.96 (0.92,1)    | 0.014533 | 0.28       | 0.003                     | 0.92 (0.87,0.97) | 0.0064  | 0.91 (0.85,0.97) | 0.0393  | 0.91 (0.83,1)    | 0.849            |            |         |                  |         |  |
| rs244338   | 53200418              | G/A                  | 0.29                      | 6.21E-14 | 0.92 (0.9,0.94)  | 6.70E-14         | 0.91 (0.89,0.93) | 0.0276  | 0.96 (0.92,1)    | 0.015585 | 0.28       | 0.0028                    | 0.92 (0.87,0.97) | 0.0058  | 0.91 (0.85,0.97) | 0.041   | 0.91 (0.83,1)    | 0.798            |            |         |                  |         |  |
| rs244336   | 53201502              | G/A                  | 0.27                      | 8.80E-13 | 0.93 (0.91,0.95) | 7.60E-13         | 0.91 (0.89,0.94) | 0.047   | 0.96 (0.92,1)    | 0.012981 | 0.09       | 0.728                     | 0.98 (0.9,1.08)  | 0.241   | 0.94 (0.84,1.05) | 0.226   | 0.92 (0.8,1.06)  | 0.987            |            |         |                  |         |  |
| rs2628321  | 53205917              | A/G                  | 0.29                      | 5.88E-14 | 0.92 (0.9,0.94)  | 7.01E-14         | 0.91 (0.89,0.93) | 0.0277  | 0.96 (0.92,1)    | 0.015346 | 0.28       | 0.0028                    | 0.92 (0.87,0.97) | 0.0054  | 0.91 (0.85,0.97) | 0.0447  | 0.91 (0.83,1)    | 0.775            |            |         |                  |         |  |
| rs2787481  | 53211110              | A/G                  | 0.27                      | 6.44E-13 | 0.92 (0.91,0.94) | 2.93E-13         | 0.91 (0.89,0.93) | 0.0637  | 0.96 (0.92,1)    | 0.008094 | 0.1        | 0.559                     | 0.98 (0.9,1.06)  | 0.178   | 0.93 (0.84,1.03) | 0.151   | 0.91 (0.79,1.04) | 0.857            |            |         |                  |         |  |
| rs244315   | 53214654              | G/A                  | 0.27                      | 4.72E-13 | 0.92 (0.91,0.94) | 4.27E-13         | 0.91 (0.89,0.93) | 0.0493  | 0.96 (0.92,1)    | 0.010962 | 0.1        | 0.599                     | 0.98 (0.9,1.06)  | 0.182   | 0.93 (0.84,1.03) | 0.173   | 0.91 (0.79,1.04) | 0.893            |            |         |                  |         |  |
| rs244317   | 53216985              | T/A                  | 0.27                      | 5.79E-13 | 0.92 (0.91,0.94) | 2.74E-13         | 0.91 (0.89,0.93) | 0.0649  | 0.96 (0.92,1)    | 0.007933 | 0.1        | 0.578                     | 0.98 (0.9,1.06)  | 0.185   | 0.93 (0.84,1.03) | 0.156   | 0.91 (0.79,1.04) | 0.857            |            |         |                  |         |  |
| rs2628316  | 53219837              | A/G                  | 0.29                      | 6.00E-14 | 0.92 (0.9,0.94)  | 1.17E-13         | 0.91 (0.89,0.93) | 0.0276  | 0.96 (0.92,1)    | 0.015608 | 0.28       | 0.0151                    | 0.93 (0.88,0.99) | 0.0115  | 0.91 (0.85,0.98) | 0.19    | 0.94 (0.86,1.03) | 0.501            |            |         |                  |         |  |
| rs244319   | 53222874              | G/A                  | 0.29                      | 2.19E-13 | 0.93 (0.91,0.94) | 4.18E-13         | 0.91 (0.89,0.94) | 0.028   | 0.96 (0.92,1)    | 0.021933 | 0.3        | 0.0263                    | 0.94 (0.89,0.99) | 0.022   | 0.92 (0.86,0.99) | 0.309   | 0.96 (0.88,1.04) | 0.452            |            |         |                  |         |  |
| rs244320   | 53222920              | G/A                  | 0.29                      | 2.19E-13 | 0.93 (0.91,0.94) | 4.18E-13         | 0.91 (0.89,0.94) | 0.028   | 0.96 (0.92,1)    | 0.021933 | 0.3        | 0.0233                    | 0.94 (0.89,0.99) | 0.0194  | 0.92 (0.86,0.99) | 0.312   | 0.96 (0.88,1.04) | 0.424            |            |         |                  |         |  |
| rs10432032 | 53224088              | A/G                  | 0.29                      | 2.47E-13 | 0.93 (0.91,0.94) | 5.33E-13         | 0.91 (0.89,0.94) | 0.0281  | 0.96 (0.92,1)    | 0.023436 | 0.3        | 0.0203                    | 0.94 (0.88,0.99) | 0.0197  | 0.92 (0.86,0.99) | 0.202   | 0.94 (0.86,1.03) | 0.565            |            |         |                  |         |  |
| rs2628315  | 53226622              | G/A                  | 0.29                      | 9.02E-14 | 0.92 (0.9,0.94)  | 1.78E-13         | 0.91 (0.89,0.93) | 0.0259  | 0.96 (0.92,0.99) | 0.018409 | 0.29       | 0.0059                    | 0.92 (0.87,0.98) | 0.0066  | 0.91 (0.85,0.97) | 0.0778  | 0.92 (0.84,1.01) | 0.715            |            |         |                  |         |  |

a: Build 37 coordinates on chromosome 17.

b: Major and Minor allele.

c: Minor Allele Frequency.

d: P-value, Odds ratio (OR) and 95% Confidence Interval (CI) for association with Overall Breast Cancer Risk, Estrogen Positive (ER+) and Estrogen Negative (ER-) disease.

e: Case-only analysis, treating subtype status as a dependent variable, models adjusted for principal components and per-study fixed-effects.

**Supplementary Table 5: Candidate causal SNPs with overlap of regulatory element**

| Variant <sup>a</sup> | rsID <sup>b</sup> | TF <sup>c</sup>                                                                       | DB_score <sup>d</sup> | GTE <sup>e</sup> all                              | GTE <sup>f</sup> breast | RefGene <sup>g</sup> | RefGeneTSS <sup>h</sup> | target_gene <sup>i</sup>                                                                   | Functional <sup>j</sup> |
|----------------------|-------------------|---------------------------------------------------------------------------------------|-----------------------|---------------------------------------------------|-------------------------|----------------------|-------------------------|--------------------------------------------------------------------------------------------|-------------------------|
| rs2787497            | rs2787497         |                                                                                       | 5                     | COX11,<br>COX11 TOM1L1,<br>CTC-462L7.1,<br>STXBP4 | STXBP4                  | STXBP4               | STXBP4 130085           | HLF:IMR90:Hi-C                                                                             | INTRON                  |
| rs8082622            | rs8082622         | AIRE_2 -,<br>Foxj1_1 -,<br>Klf7 +,<br>NF-Y_known3 -,<br>RXRA_disc5 +                  | 5                     | COX11,<br>COX11 TOM1L1,<br>CTC-462L7.1,<br>STXBP4 | STXBP4                  | STXBP4               | STXBP4 131441           | HLF:IMR90:Hi-C                                                                             | INTRON                  |
| rs2529510            | rs2529510         | BATF_disc2 -,<br>CEBPB_known4 -,<br>Ik-1_1 -,<br>Ik-1_2 -,<br>Irf_disc6 -,<br>Sox_4 - | 6                     | COX11,<br>CTC-462L7.1,<br>STXBP4                  |                         | STXBP4               | STXBP4 135920           |                                                                                            | INTRON                  |
| rs244373             | rs244373          | BRCA1_known2 +,<br>CACD_1 -,<br>ERalpha-a_disc2 +,RAR -,<br>RXRA_disc1 -,<br>SF1 +    | 6                     | CTC-462L7.1,<br>STXBP4                            | STXBP4                  | STXBP4               | STXBP4 138823           |                                                                                            | INTRON                  |
| rs244358             | rs244358          | SF1 +,<br>TAL1_disc1 -                                                                | 7                     | COX11,<br>CTC-462L7.1,<br>STXBP4                  | STXBP4                  | STXBP4               | STXBP4 146105           |                                                                                            | INTRON                  |
| rs187242             | rs187242          | HNF1_7 -,<br>Mef2_known1 +,<br>Mef2_known6 +,<br>Sox_15 +,Sox_2 +                     | 7                     | CTC-462L7.1,<br>STXBP4                            | STXBP4                  | STXBP4               | STXBP4 146820           |                                                                                            | INTRON                  |
| rs244353             | rs244353          | HNF4_known1 +,<br>PPAR_3 +,<br>RFX5_known2 +,<br>RXRA_known5 -                        | 1f                    | CTC-462L7.1,<br>STXBP4                            | STXBP4                  | STXBP4               | HLF 147551              | STXBP4:BI_CD4_<br>Memory_Primary_7pool:Hnisz,<br>HLF:HepG2:PreSTIGE,<br>STXBP4:HUVEC:Hnisz | INTRON                  |

|                  |            |                                                                            |    |                                                   |        |        |            |                         |        |
|------------------|------------|----------------------------------------------------------------------------|----|---------------------------------------------------|--------|--------|------------|-------------------------|--------|
| rs244348         | rs244348   | BCL_disc7 -,<br>Cdc5 +,Cdx +,<br>Isl2 +,<br>Mef2_known3 +,<br>NRSF_disc7 - | 6  | COX11,<br>COX11 TOM1L1,<br>CTC-462L7.1,<br>STXBP4 | STXBP4 | STXBP4 | HLF 146029 |                         | INTRON |
| rs244342         | rs244342   | HDAC2_disc6 +                                                              | 7  | COX11 TOM1L1,<br>CTC-462L7.1,<br>STXBP4           | STXBP4 | STXBP4 | HLF 143913 |                         | INTRON |
| rs244338         | rs244338   | CDP_7 +,<br>CEBPG -,<br>SRF_known5 -                                       | 6  | CTC-462L7.1,<br>STXBP4                            | STXBP4 | STXBP4 | HLF 141902 |                         | INTRON |
| rs244337         | rs244337   | Foxj2_2 +,<br>HES1 +,<br>RFX5_known1 +,<br>ZBRK1 +                         | 7  | CTC-462L7.1,<br>STXBP4                            | STXBP4 | STXBP4 | HLF 141196 | HLF:ColonCrypt:PreSTIGE | INTRON |
| rs244336         | rs244336   | Mrg1::Hoxa9_2 -,<br>RREB-1_1 +,<br>SIX5_known1 -,<br>p300_disc7 -          | 7  | COX11,<br>CTC-462L7.1,<br>STXBP4                  | STXBP4 | STXBP4 | HLF 140818 | HLF:ColonCrypt:PreSTIGE | INTRON |
| chr17:53205761:D | rs11298913 |                                                                            |    | COX11,<br>CTC-462L7.1,<br>STXBP4,<br>TOM1L1       | STXBP4 | STXBP4 | HLF 136559 |                         | INTRON |
| rs2628321        | rs2628321  |                                                                            | 7  | COX11,<br>COX11 TOM1L1,<br>CTC-462L7.1,<br>STXBP4 | STXBP4 | STXBP4 | HLF 136403 |                         | INTRON |
| rs2787486        | rs2787486  | GR_disc5 +,<br>Maf_disc2 -,<br>RXRA_known3 -,<br>VDR_2 +                   | 7  | CTC-462L7.1,<br>STXBP4                            | STXBP4 | STXBP4 | HLF 132546 | HLF:IMR90:Hi-C          | INTRON |
| rs2787481        | rs2787481  | Pax-6_1 -                                                                  | 1f | COX11,<br>COX11 TOM1L1,<br>CTC-462L7.1,<br>STXBP4 | STXBP4 | STXBP4 | HLF 131210 | HLF:IMR90:Hi-C          | INTRON |

|                  |             |                                                                                                                                                                                                                       |    |                                                              |        |        |            |        |
|------------------|-------------|-----------------------------------------------------------------------------------------------------------------------------------------------------------------------------------------------------------------------|----|--------------------------------------------------------------|--------|--------|------------|--------|
| rs244315         | rs244315    | CAC-binding-protein -,<br>CTCF_disc1 -,<br>EWSR1-FLI1 +,<br>MAZ -,<br>PU.1_disc3 +,<br>RXRA_known6 +,<br>SP1_disc3 -,<br>STAT_disc7 -,<br>TATA_disc7 +,<br>TCF12_disc5 +,<br>TFII-1 -,<br>ZNF263_disc1 +,<br>Zfp281 - | 6  | COX11,<br>CTC-462L7.1,<br>STXBP4,<br>TOM1L1                  | STXBP4 | STXBP4 | HLF 127666 | INTRON |
| rs244317         | rs244317    | Foxf2 +,<br>Sin3Ak-20_disc6 +                                                                                                                                                                                         | 1f | COX11,<br>COX11 TOM1L1,<br>CTC-462L7.1,<br>STXBP4,<br>TOM1L1 | STXBP4 | STXBP4 | HLF 125335 | INTRON |
| rs2628316        | rs2628316   | HNF1_2 -,<br>PU.1_disc3 +                                                                                                                                                                                             | 6  | COX11,<br>COX11 TOM1L1,<br>CTC-462L7.1,<br>STXBP4            | STXBP4 | STXBP4 | HLF 122483 | INTRON |
| chr17:53221365:l | rs200876987 | CTCF_disc10 -,<br>Foxp1 -,Gm397 +,<br>Myf_2 +,<br>RREB-1_2 -                                                                                                                                                          |    | CTC-462L7.1,<br>STXBP4                                       | STXBP4 | STXBP4 | HLF 120955 | INTRON |
| rs244318         | rs244318    | CTCF_disc10 -,<br>Foxp1 -,<br>Gm397 +,<br>Myf_2 +,<br>RREB-1_1 -,<br>RREB-1_2 -                                                                                                                                       | 6  | COX11,<br>CTC-462L7.1,<br>STXBP4                             | STXBP4 | STXBP4 | HLF 120952 | INTRON |
| rs244319         | rs244319    | Mrg_2 +,<br>Sin3Ak-20_disc3 +,<br>Tgif1_1 -                                                                                                                                                                           | 4  | COX11,<br>COX11 TOM1L1,<br>CTC-462L7.1,<br>STXBP4            | STXBP4 | STXBP4 | HLF 119446 | INTRON |
| rs244320         | rs244320    | HNF6 +                                                                                                                                                                                                                | 4  | COX11,<br>CTC-462L7.1,<br>STXBP4                             | STXBP4 | STXBP4 | HLF 119400 | INTRON |

|            |            |                                                                                                                                                                                                |   |                                                   |        |        |            |        |
|------------|------------|------------------------------------------------------------------------------------------------------------------------------------------------------------------------------------------------|---|---------------------------------------------------|--------|--------|------------|--------|
| rs244321   | rs244321   |                                                                                                                                                                                                | 7 | COX11,<br>CTC-462L7.1,<br>STXBP4                  | STXBP4 | STXBP4 | HLF 118322 | INTRON |
| rs10432032 | rs10432032 | Elf3 +,<br>Evi-1_4 -,<br>Foxp1 -,<br>GATA_disc3 +,<br>GATA_known8 +,<br>HDAC2_disc6 -,<br>Ik-2_3 +,<br>Irf_disc3 +,<br>Irf_known9 -,<br>NF-AT +,<br>TATA_disc7 +,<br>Zfp105 -,<br>p300_disc5 + | 6 |                                                   |        | STXBP4 | HLF 118232 | INTRON |
| rs244322   | rs244322   | STAT_known10 -                                                                                                                                                                                 | 5 | COX11,<br>COX11 TOM1L1,<br>CTC-462L7.1,<br>STXBP4 | STXBP4 | STXBP4 | HLF 117561 | INTRON |
| rs2628315  | rs2628315  | Pax-4_4 +                                                                                                                                                                                      | 6 | COX11,<br>COX11 TOM1L1,<br>CTC-462L7.1,<br>STXBP4 | STXBP4 | STXBP4 | HLF 115698 | INTRON |
| rs244294   | rs244294   | Cdx2_1 -,<br>Cdx2_2 -,<br>Hoxa10 -,<br>Hoxa9 -,<br>Hoxb9 -,<br>Hoxc10 +,<br>Hoxc9 -,<br>Hoxd10 -,<br>Nkx6-1_1 -,<br>PLZF +                                                                     | 6 | COX11,<br>COX11 TOM1L1,<br>CTC-462L7.1,<br>STXBP4 | STXBP4 | STXBP4 | HLF 113777 | INTRON |

---

|   | Short   | Long            | Description                                                                        |
|---|---------|-----------------|------------------------------------------------------------------------------------|
| a | Variant | variant         | Variant ID                                                                         |
| b | rsID    | rsID            | rsID for top snp at locus                                                          |
| c | TF      | TF_motifs delta | ENCODE_PWM alteration. The delta shown as "+" (PWM strengthened) or "-" (weakened) |

|   |              |                        |                                                                                                                                                                                                                                                                               |
|---|--------------|------------------------|-------------------------------------------------------------------------------------------------------------------------------------------------------------------------------------------------------------------------------------------------------------------------------|
| d | DB_score     | RegulomeDB_score       | RegulomeDB score. Score ( <a href="http://regulomedb.org/help#score">http://regulomedb.org/help#score</a> ). Scale: 1 is most likely to be functional, to 7 = least likely.                                                                                                   |
| e | GTEEx all    | eQTL_target_all        | SNP reported to be associated with expression in studies including GTEEx.v6, GEUVADIS, Westra Nat Genetics. All tissue types included.                                                                                                                                        |
| f | GTEEx breast | eQTL_GTEEx.breast      | SNP is associated with expression in GTEEx breast samples (N =186)                                                                                                                                                                                                            |
| g | RefGene      | Overlapping_RefGene    | SNP falls within an annotated RefGene (within transcribed sequence)                                                                                                                                                                                                           |
| h | RefGeneTSS   | RefGeneTSS distance    | Distance to nearest refseq transcription start site                                                                                                                                                                                                                           |
| i | target_gene  | target_gene_prediction | SNP lies in a putative regulatory element predicted to regulated the listed gene, in ANY cell type, reported by methods IM-PET, Hnisz, PreSTIGE, Chia-PET, Hi-C, 3C, 4C, 5C, FANTOM5. Format = target:cell:method,,,target:cell:method,,,target:cell:method1,method2,,,,..... |
| j | Functional   | functional_annotation  | refgene functional annotation                                                                                                                                                                                                                                                 |

---

**Supplementary Table 6. Summary of association between 17q22 breast cancer risk iCHAV and allelic imbalance of genes within 1Mb up- and downstream flanking region. Levene's Test was used to evaluate equality of variances between heterozygote (CT) and homozygote (CC and TT) samples. The marker SNPs which passed the criteria did not have enough coverage for *KIF2B*, *TMEM100*, and *ANKFN1* to be included in the analysis.**

| <b>iCHAV marker (position)</b> | <b>Target Gene</b> | <b>Number of Samples (CC, CT, TT)</b> | <b>P-value</b> |
|--------------------------------|--------------------|---------------------------------------|----------------|
| rs2787481 (chr17: 53211110)    | TOM1L1             | 84, 74, 5                             | 0.081          |
| rs2787481 (chr17: 53211110)    | COX11              | 84, 78, 5                             | 0.032*         |
| rs2787481 (chr17: 53211110)    | STXBP4             | 53, 50, 0                             | 0.671          |
| rs2787481 (chr17: 53211110)    | HLF                | 49, 28, 10                            | 0.484          |
| rs2787481 (chr17: 53211110)    | MMD                | 114, 84, 17                           | 0.120          |
| rs2787481 (chr17: 53211110)    | PCTP               | 67, 46, 9                             | 0.191          |

\* marginal statistical significant P-value (<0.05)



**Supplementary Table 7: eQTL analysis from the METABRIC study (FDR-adjusted P values)**

| Top breast cancer hit with each gene |              |            |            |           |           |          |       |         |
|--------------------------------------|--------------|------------|------------|-----------|-----------|----------|-------|---------|
| SNP                                  | ilmn         | beta       | tstat      | pval      | fdr       | pos      | info  | gene    |
| rs2787486                            | ILMN_1666280 | -0.113065  | -3.836345  | 0.0001921 | 0.0506373 | 53209774 | 0.971 | COX11   |
| rs2787486                            | ILMN_1802642 | -0.1114234 | -2.195578  | 0.0298564 | 0.9843687 | 53209774 | 0.971 | TOM1L1  |
| rs2787486                            | ILMN_1802257 | -0.0697964 | -1.944933  | 0.0538932 | 1         | 53209774 | 0.971 | PCTP    |
| rs2787486                            | ILMN_1811239 | -0.0399775 | -1.877066  | 0.0626997 | 1         | 53209774 | 0.971 | ANKFN1  |
| rs2787486                            | ILMN_1707391 | 0.0343524  | 1.232992   | 0.2197537 | 1         | 53209774 | 0.971 | STXBP4  |
| rs2787486                            | ILMN_1652181 | 0.0255915  | 1.180756   | 0.2398069 | 1         | 53209774 | 0.971 | KIF2B   |
| rs2787486                            | ILMN_1733937 | 0.1963861  | 1.046407   | 0.2972709 | 1         | 53209774 | 0.971 | MMD     |
| rs2787486                            | ILMN_1722829 | -0.0551331 | -0.9441325 | 0.3468139 | 1         | 53209774 | 0.971 | HLF     |
| rs2787486                            | ILMN_2135537 | 0.0099096  | 0.6348671  | 0.5266057 | 1         | 53209774 | 0.971 | KIF2B   |
| rs2787486                            | ILMN_1698259 | 0.0345281  | 0.311061   | 0.7562413 | 1         | 53209774 | 0.971 | TMEM100 |

| Top eQTL with each gene |              |           |           |           |           |          |       |         |
|-------------------------|--------------|-----------|-----------|-----------|-----------|----------|-------|---------|
| SNP                     | ilmn         | beta      | tstat     | pval      | fdr       | pos      | info  | gene    |
| rs138326143             | ILMN_1666280 | 1.190773  | 5.556613  | 1.44E-07  | 0.0029157 | 53408414 | 0.993 | COX11   |
| rs186663197             | ILMN_1802642 | 32.71718  | 4.50583   | 0.0000143 | 0.0084882 | 53156559 | 0.037 | TOM1L1  |
| rs187880135             | ILMN_2135537 | 7.352602  | 4.410875  | 0.0000211 | 0.0103592 | 52762294 | 0.044 | KIF2B   |
| rs74920690              | ILMN_1652181 | 0.1790671 | 4.058103  | 0.0000839 | 0.0295929 | 52855066 | 0.874 | KIF2B   |
| rs244383                | ILMN_1811239 | -37.61968 | -4.0566   | 0.0000844 | 0.0295929 | 53300592 | 0.303 | ANKFN1  |
| rs184628656             | ILMN_1802257 | 57.6242   | 3.716124  | 0.0002969 | 0.0667873 | 52798123 | 0.051 | PCTP    |
| rs183917963             | ILMN_1707391 | 2.213403  | 3.605547  | 0.0004393 | 0.0844782 | 52572748 | 0.139 | STXBP4  |
| chr17526883781          | ILMN_1698259 | 1.659709  | 3.551286  | 0.0005308 | 0.0976632 | 52688378 | 0.64  | TMEM100 |
| rs189007317             | ILMN_1722829 | 0.4152539 | 3.515306  | 0.0006011 | 0.1044669 | 52506510 | 0.665 | HLF     |
| rs8065301               | ILMN_1733937 | -0.921983 | -3.088207 | 0.0024518 | 0.2716971 | 53428677 | 1     | MMD     |

---

Supplementary Table 8: GTEx findings; tissues in which there is a significant eQTL for rs244353

---

| Gene Symbol | SNP Id   | P-Value  | Effect Size | Tissue                          |
|-------------|----------|----------|-------------|---------------------------------|
| STXBP4      | rs244353 | 7.10E-16 | -0.39       | Adipose - Subcutaneous          |
| STXBP4      | rs244353 | 5.70E-09 | -0.45       | Adipose - Visceral (Omentum)    |
| STXBP4      | rs244353 | 7.00E-07 | -0.39       | Artery - Aorta                  |
| STXBP4      | rs244353 | 9.20E-20 | -0.43       | Artery - Tibial                 |
| STXBP4      | rs244353 | 1.3E-06  | -0.39       | Breast - Mammary Tissue         |
| STXBP4      | rs244353 | 2.00E-10 | -0.41       | Cells - Transformed fibroblasts |
| STXBP4      | rs244353 | 7.70E-11 | -0.37       | Lung                            |
| STXBP4      | rs244353 | 4.90E-12 | -0.36       | Nerve - Tibial                  |
| STXBP4      | rs244353 | 6.00E-07 | -0.34       | Skin - Sun Exposed (Lower leg)  |
| STXBP4      | rs244353 | 9.30E-11 | -0.35       | Thyroid                         |

---

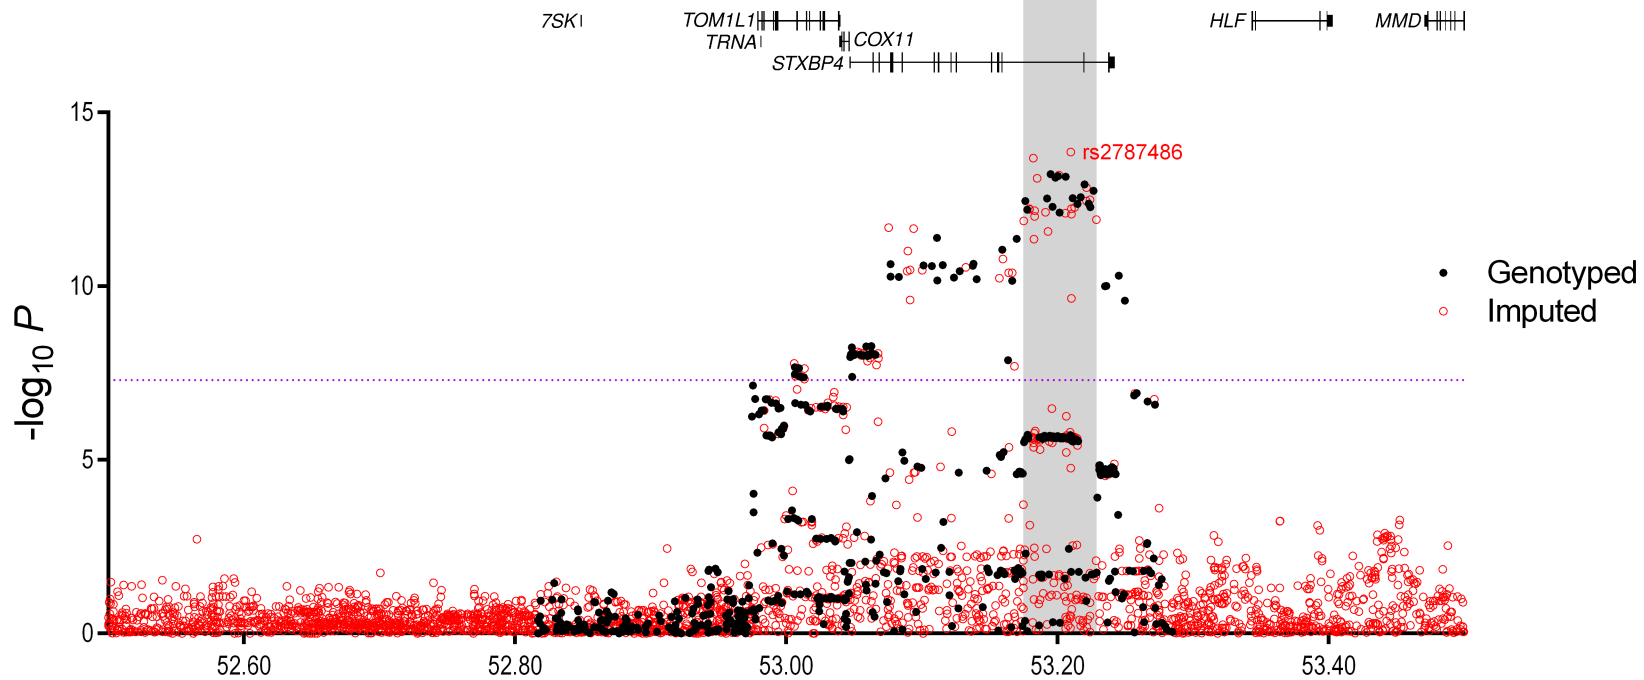

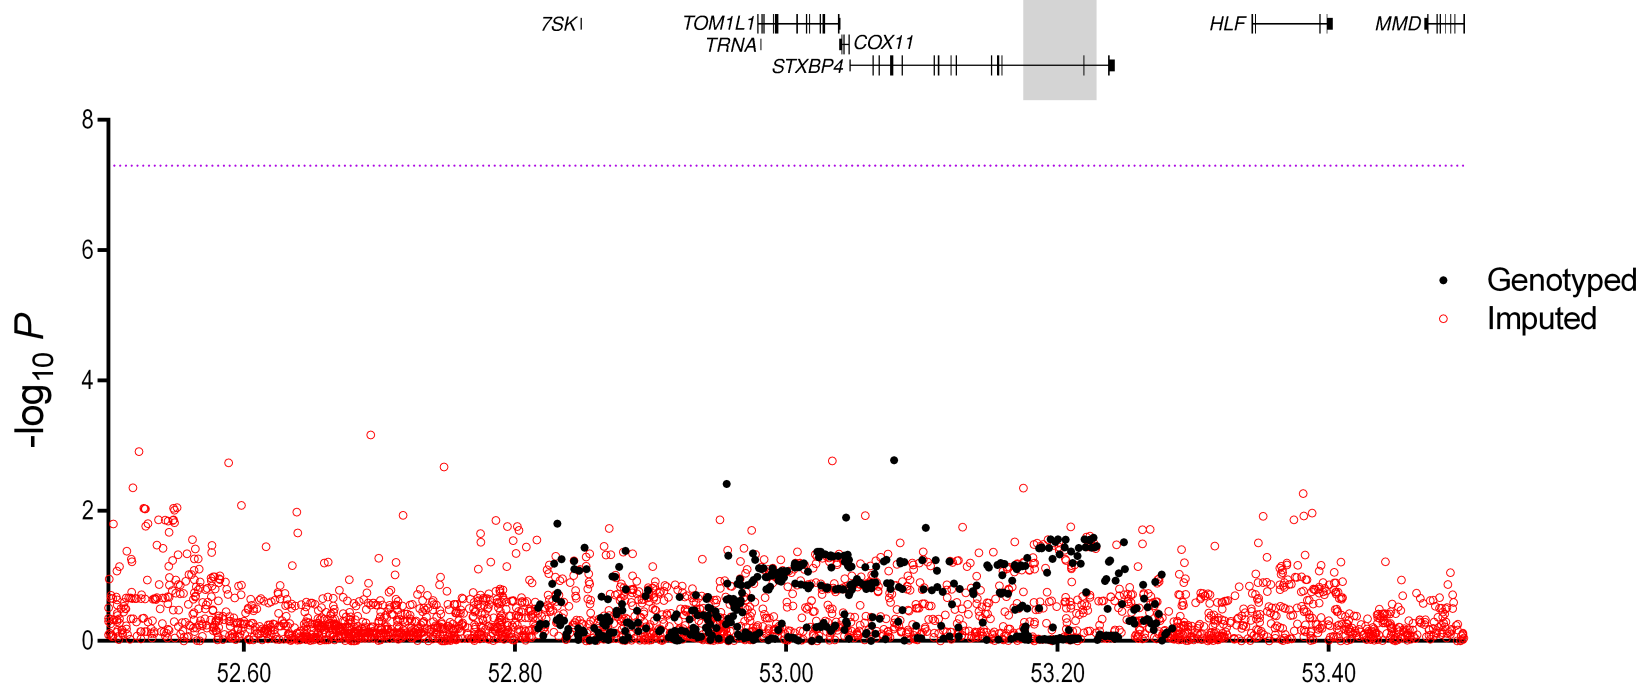

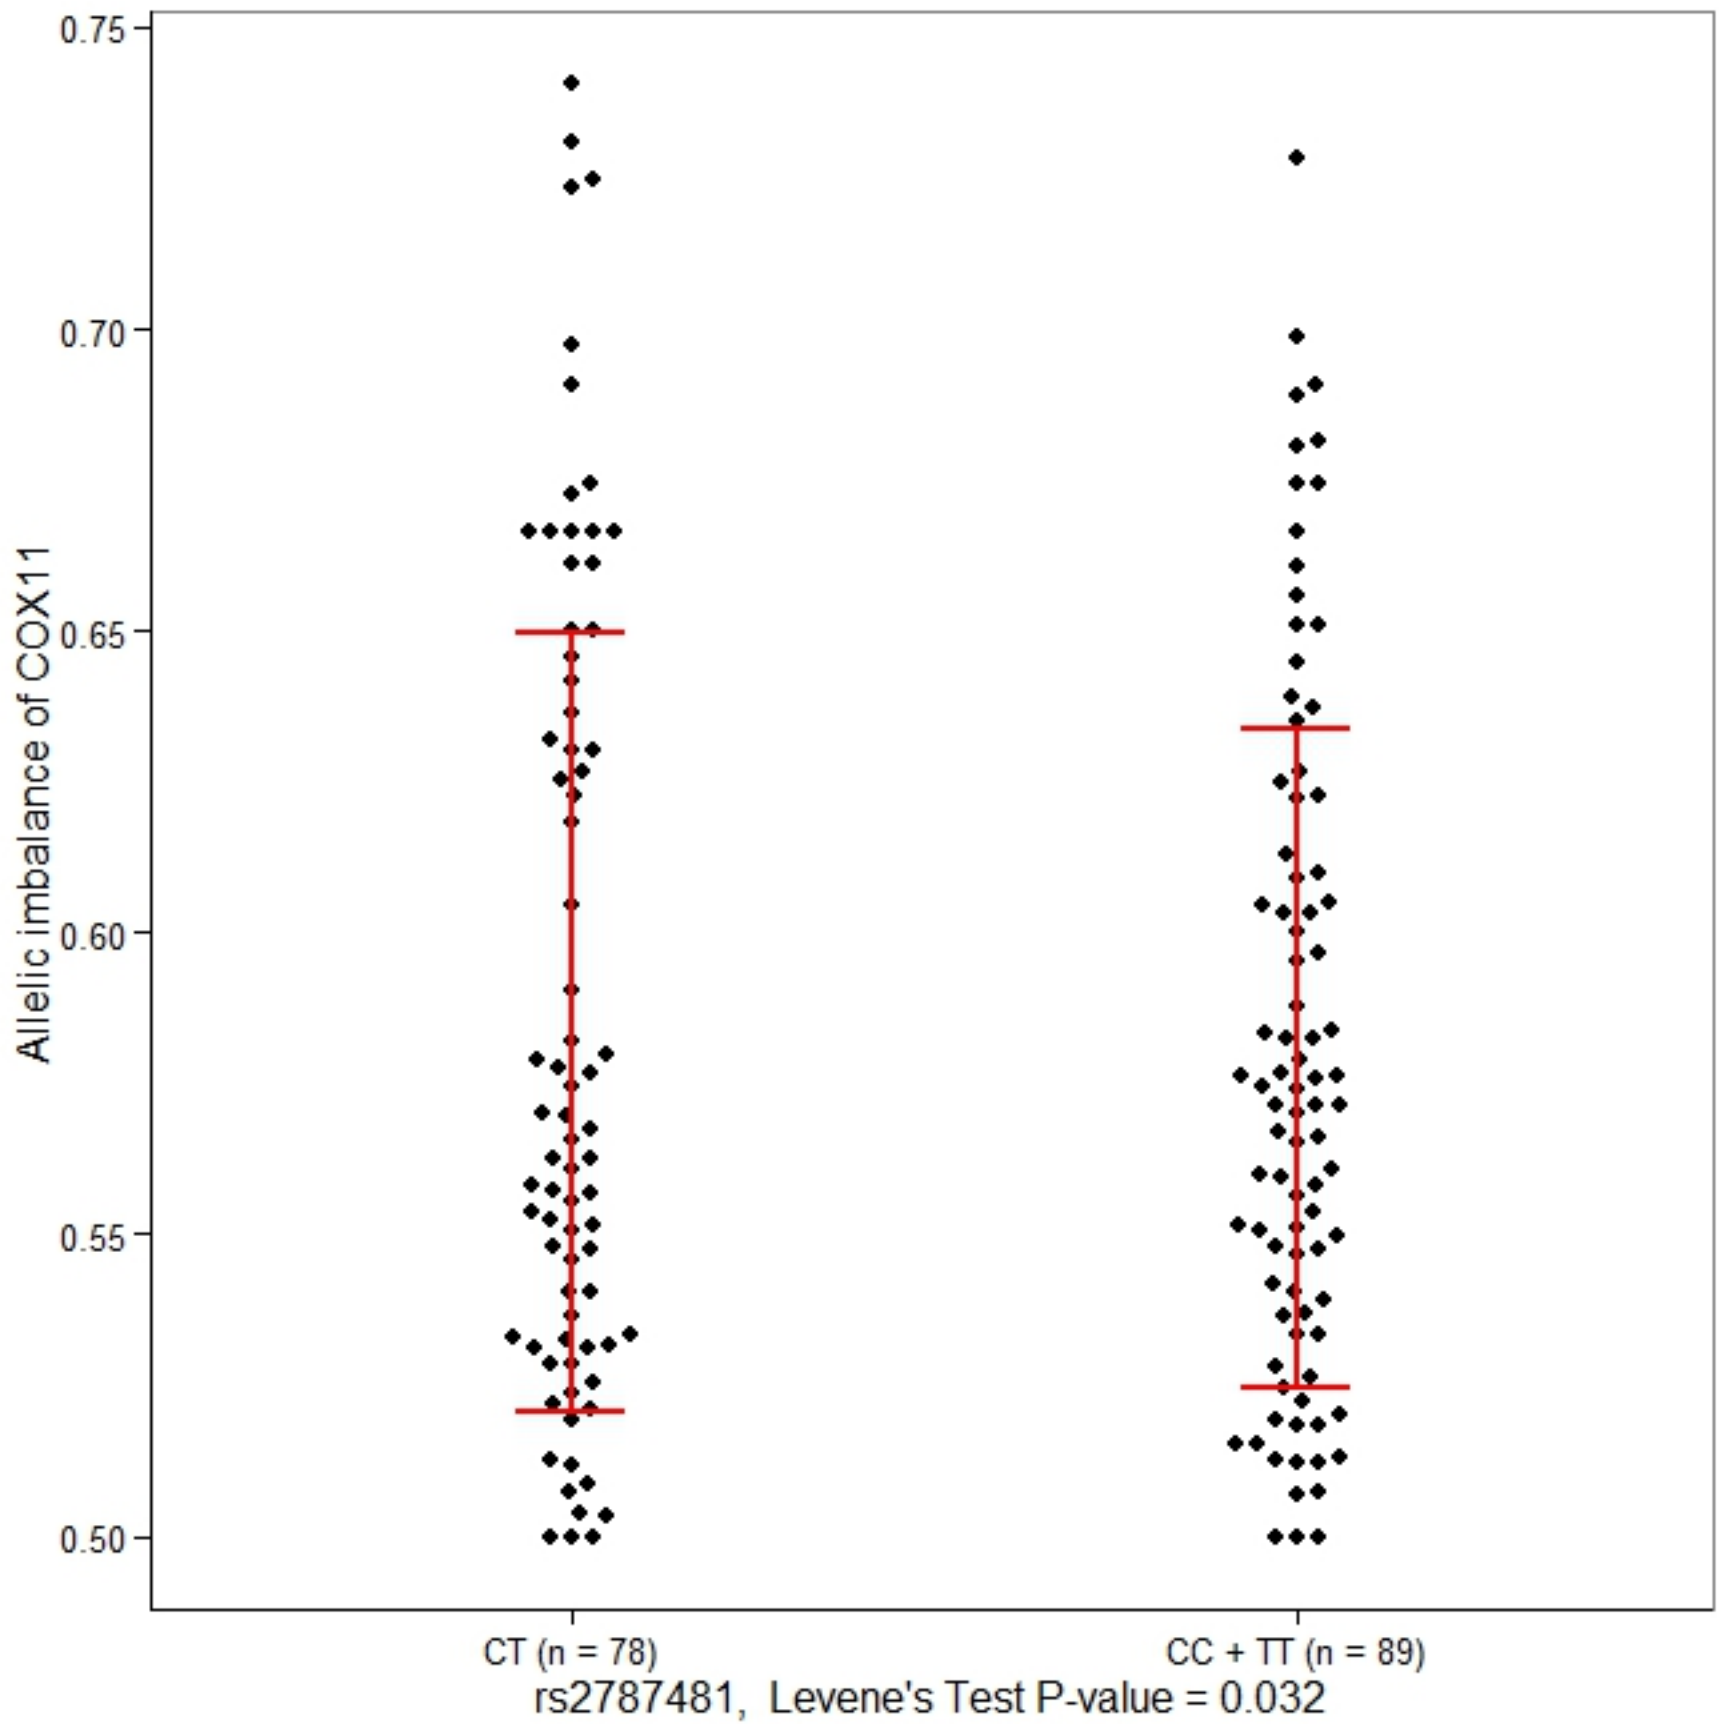

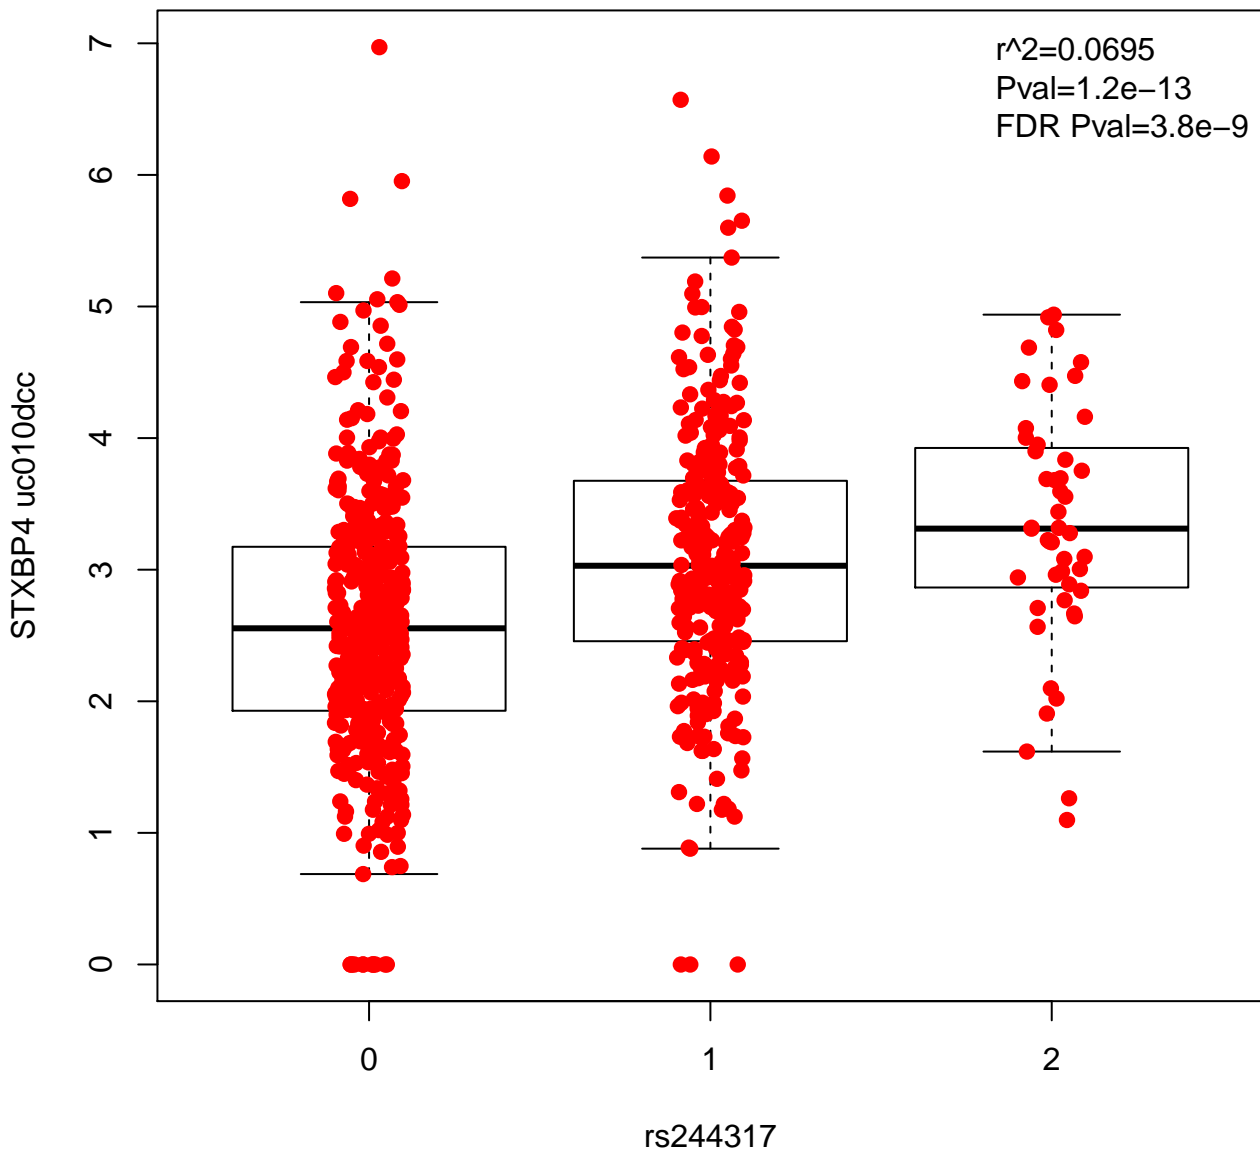

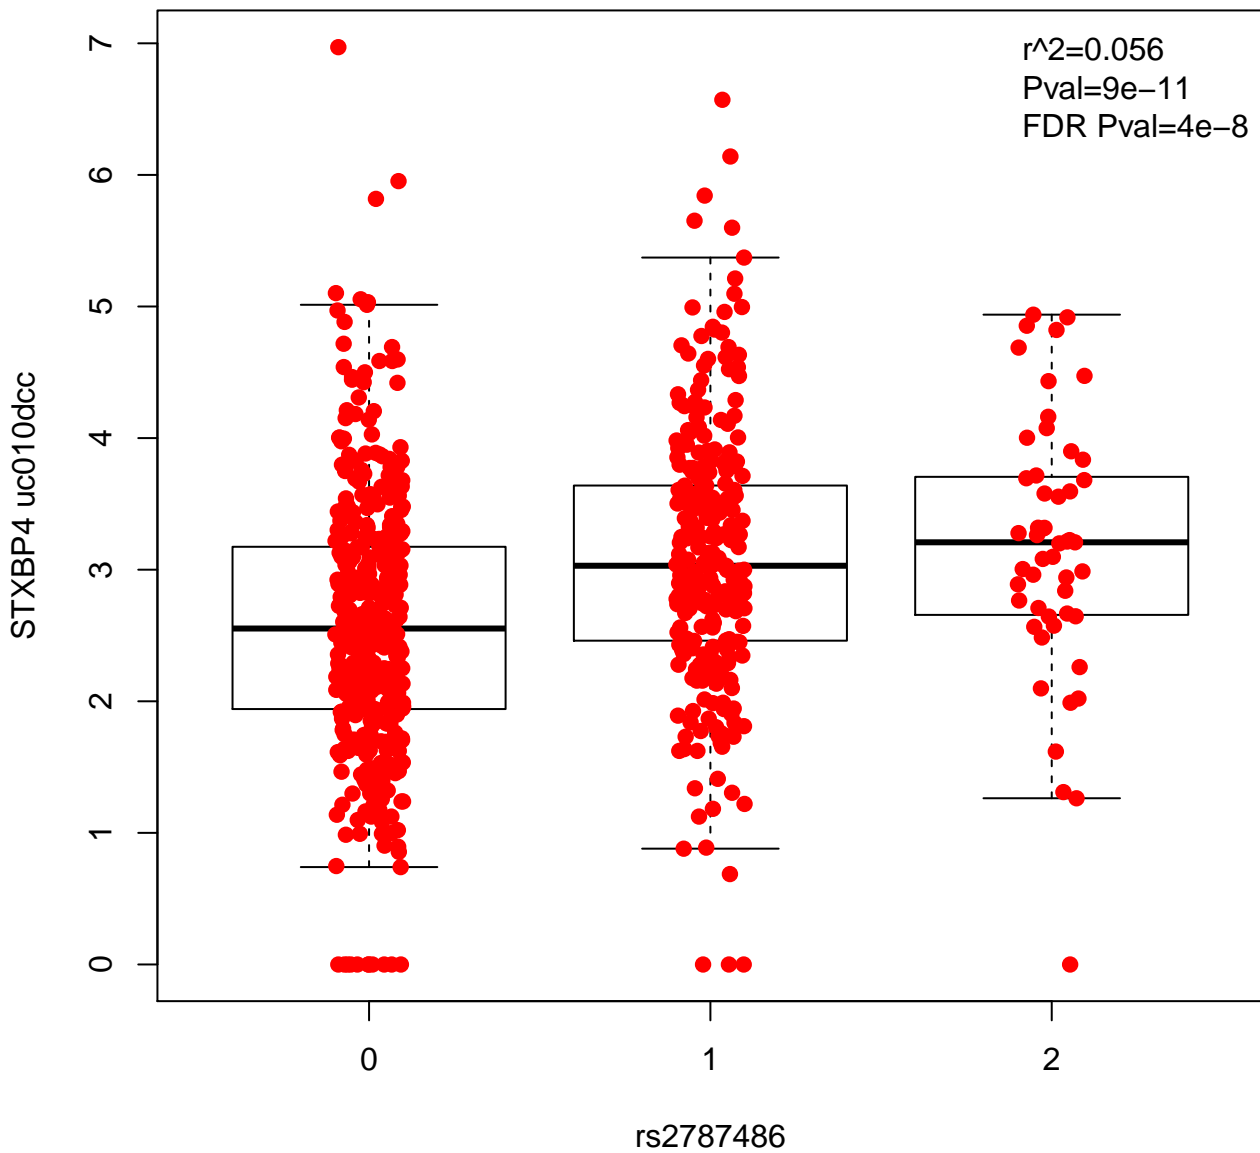

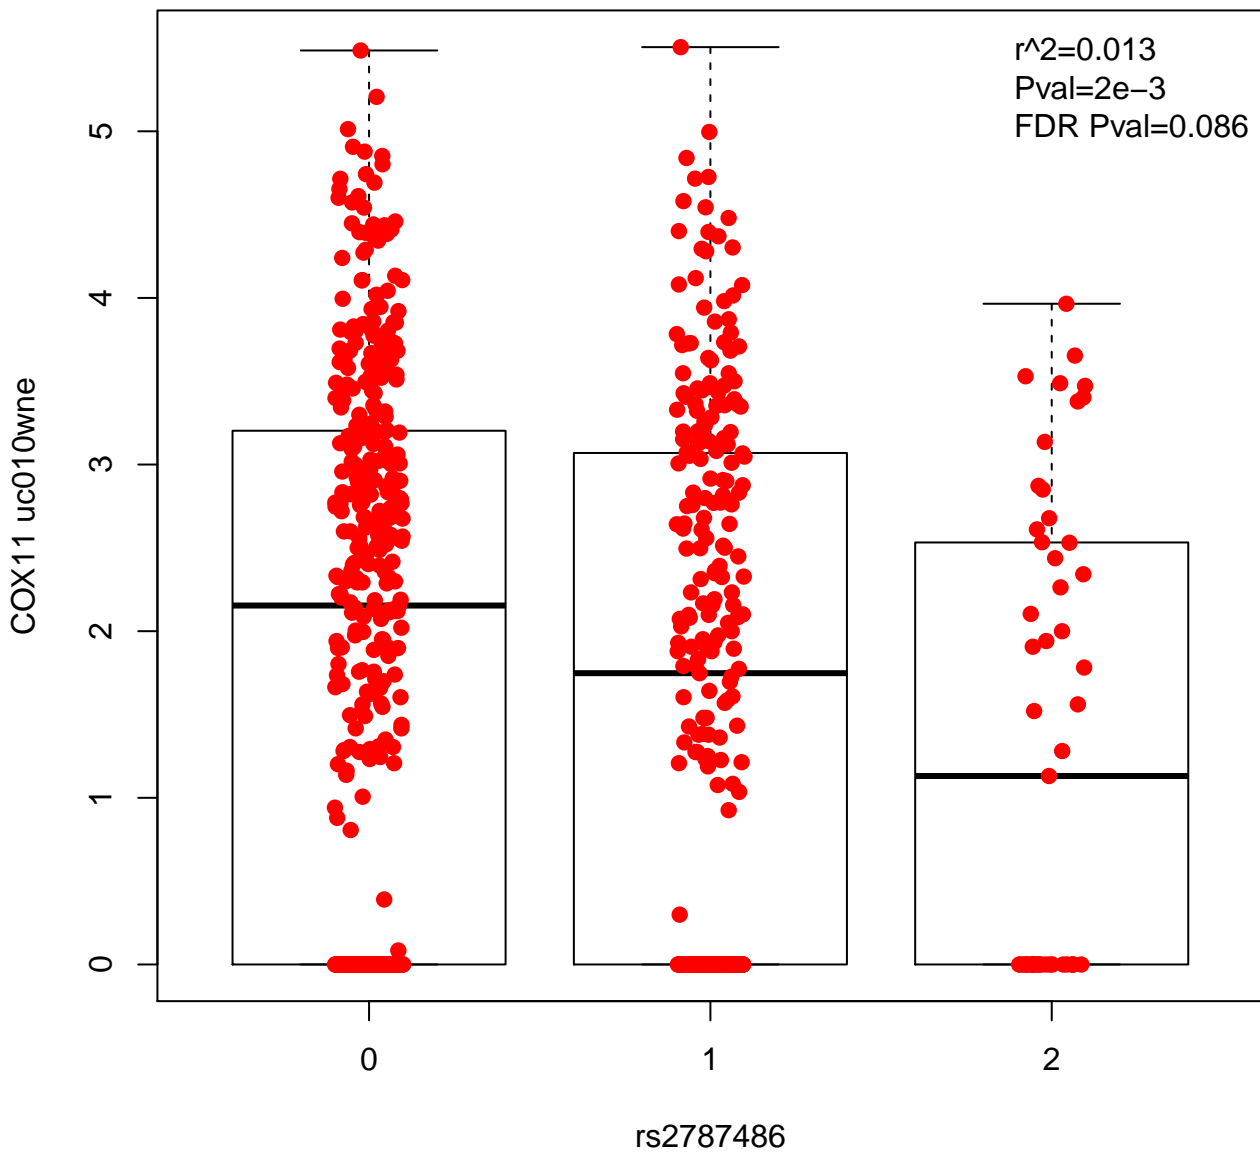



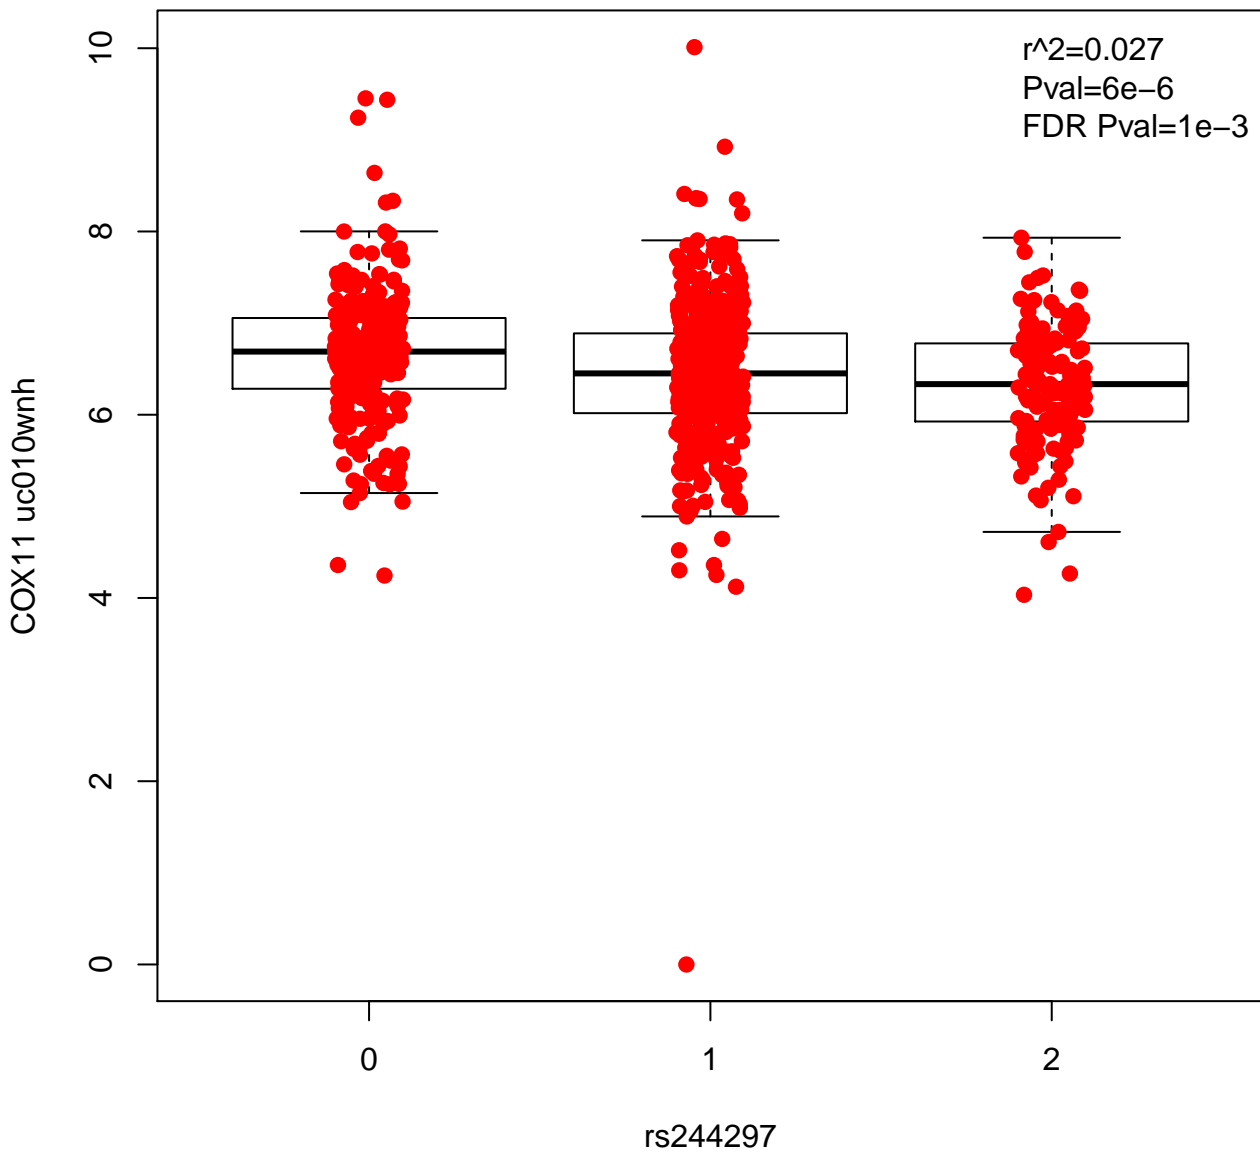

Breast\_Mammary\_Tissue eQTL rs244353 ENSG00000166263.9

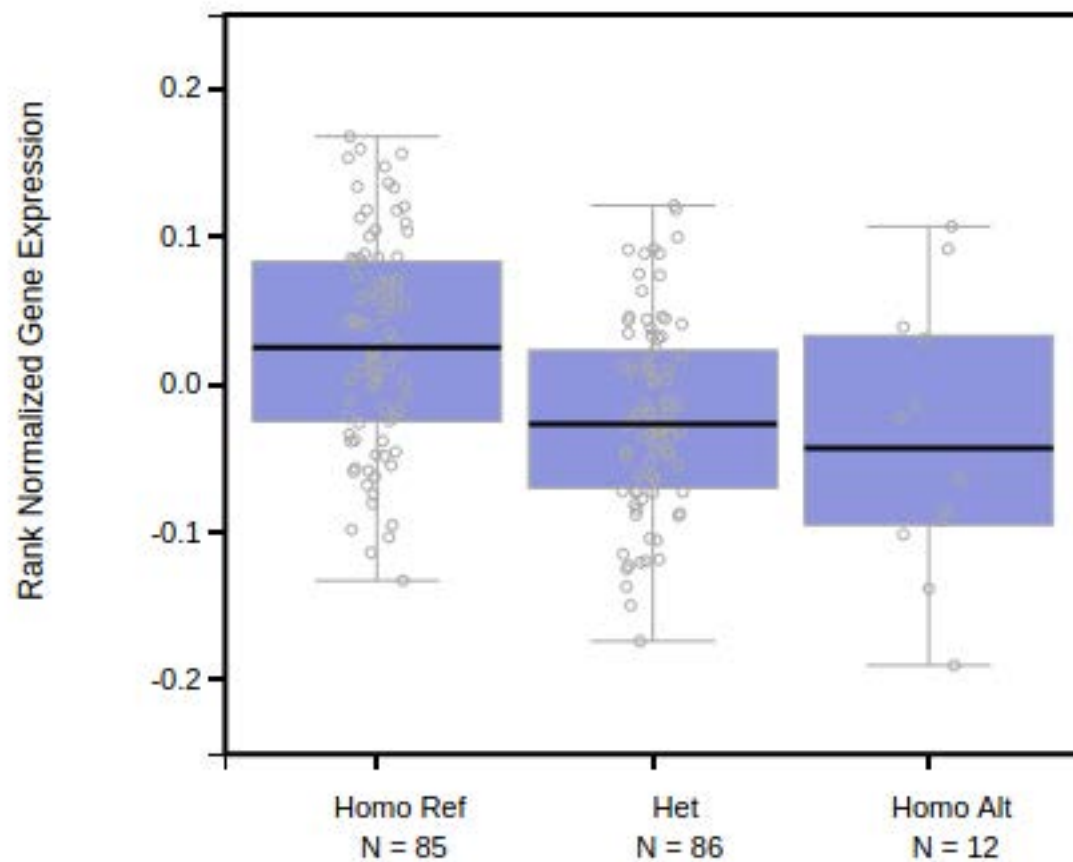

Supplement: srep32512-s1.pdf [file srep32512-s1.pdf]
